# Supplementary material for: Design of a randomised controlled trial of the effects of empagliflozin on myocardial perfusion, function and metabolism in type 2 diabetes patients at high cardiovascular risk (the SIMPLE trial)
Source: PubMed Central journal article supplement — BMJ Open. 2019 Nov 27;9(11):e029098. doi: 10.1136/bmjopen-2019-029098 (PMC6887087; doi:10.1136/bmjopen-2019-029098), 2019-11-27
Supplement: bmjopen-2019-029098.draft_revisions.pdf [file bmjopen-2019-029098.draft_revisions.pdf]

# BMJ Open

BMJ Open is committed to open peer review. As part of this commitment we make the peer review history of every article we publish publicly available.

When an article is published we post the peer reviewers' comments and the authors' responses online. We also post the versions of the paper that were used during peer review. These are the versions that the peer review comments apply to.

The versions of the paper that follow are the versions that were submitted during the peer review process. They are not the versions of record or the final published versions. They should not be cited or distributed as the published version of this manuscript.

BMJ Open is an open access journal and the full, final, typeset and author-corrected version of record of the manuscript is available on our site with no access controls, subscription charges or pay-per-view fees (<http://bmjopen.bmj.com>).

If you have any questions on BMJ Open's open peer review process please email [info.bmjopen@bmj.com](mailto:info.bmjopen@bmj.com)

# BMJ Open

## Design of a randomized controlled trial of the effects of empagliflozin on myocardial perfusion, function and metabolism in type 2 diabetes patients at high cardiovascular risk (The SIMPLE trial)

|                               |                                                                                                                                                                                                                                                                                                                                                                                                                                                                                                                                                                                                                                                                                                                                                                                                                                                                                                                                                                                                                                                                                       |
|-------------------------------|---------------------------------------------------------------------------------------------------------------------------------------------------------------------------------------------------------------------------------------------------------------------------------------------------------------------------------------------------------------------------------------------------------------------------------------------------------------------------------------------------------------------------------------------------------------------------------------------------------------------------------------------------------------------------------------------------------------------------------------------------------------------------------------------------------------------------------------------------------------------------------------------------------------------------------------------------------------------------------------------------------------------------------------------------------------------------------------|
| Journal:                      | <i>BMJ Open</i>                                                                                                                                                                                                                                                                                                                                                                                                                                                                                                                                                                                                                                                                                                                                                                                                                                                                                                                                                                                                                                                                       |
| Manuscript ID                 | bmjopen-2019-029098                                                                                                                                                                                                                                                                                                                                                                                                                                                                                                                                                                                                                                                                                                                                                                                                                                                                                                                                                                                                                                                                   |
| Article Type:                 | Protocol                                                                                                                                                                                                                                                                                                                                                                                                                                                                                                                                                                                                                                                                                                                                                                                                                                                                                                                                                                                                                                                                              |
| Date Submitted by the Author: | 11-Jan-2019                                                                                                                                                                                                                                                                                                                                                                                                                                                                                                                                                                                                                                                                                                                                                                                                                                                                                                                                                                                                                                                                           |
| Complete List of Authors:     | Jürgens, Mikkel; Herlev Hospital, Schou, Morten; Herlev Hospital, Cardiology<br>Hasbak, Philip; Copenhagen University Hospital, Rigshospitalet, Clinical Physiology, Nuclear Medicine & PET 4011, Cluster of Molecular Imaging<br>kjær, andreas; Copenhagen University Hospital, Rigshospitalet, Clinical Physiology, Nuclear Medicine & PET 4011, Cluster of Molecular Imaging<br>Wolsk, Emil; Rigshospitalet, Department of Cardiology - The Heart Centre<br>Zerahn, Bo; Herlev and Gentofte Hospital, University of Copenhagen, Department of Clinical Physiology and Nuclear Medicine<br>Wiberg, Mikkel; Herlev Hospital, Medicine<br>Brandt, Niels; Herlev and Gentofte Hospital, University of Copenhagen, Department of medicine<br>Gæde, Peter; Slagelse Sygehus<br>Rossing, Peter; Steno Diabetes Center AS<br>Faber, J; Herlev Hospital, Medicine<br>Inzucchi, Silvio; Yale School of Medicine, Section of Endocrinology<br>Gustafsson, Finn; Rigshospitalet, Department of Cardiology - The Heart Centre<br>Kistorp, Caroline; Rigshospitalet, Department of Endocrinology |
| Keywords:                     | Diabetic nephropathy & vascular disease < DIABETES & ENDOCRINOLOGY, CARDIOLOGY, Cardiovascular imaging < RADIOLOGY & IMAGING                                                                                                                                                                                                                                                                                                                                                                                                                                                                                                                                                                                                                                                                                                                                                                                                                                                                                                                                                          |
|                               |                                                                                                                                                                                                                                                                                                                                                                                                                                                                                                                                                                                                                                                                                                                                                                                                                                                                                                                                                                                                                                                                                       |

SCHOLARONE™  
Manuscripts

1  
2  
3  
4  
5 Design of a randomized controlled trial of the effects of empagliflozin  
6  
7  
8 on myocardial perfusion, function and metabolism in type 2 diabetes  
9  
10 patients at high cardiovascular risk (The SIMPLE trial)  
11  
12  
13  
14

---

15  
16  
17 Mikkel Jürgens<sup>1</sup>, Morten Schou<sup>2,3</sup>, Philip Hasbak<sup>4</sup>, Andreas Kjær<sup>4</sup>, Emil Wolsk<sup>5</sup>, Bo Zerahn<sup>6</sup>,

18  
19  
20 Mikkel Wiberg<sup>1</sup>, Niels Brandt<sup>7</sup>, Peter Gæde<sup>8</sup>, Peter Rossing<sup>3,9</sup>, Jens Faber<sup>1,3</sup>, Silvio E.

21  
22  
23  
24 Inzucchi<sup>10</sup>, Finn Gustafsson<sup>4,9</sup>, Caroline Kistorp<sup>3,7</sup>  
25  
26  
27

---

28  
29  
30 **Author e-mail addresses:**

31  
32 Mikkel Jürgens: [mikkel.juergens.01@regionh.dk](mailto:mikkel.juergens.01@regionh.dk); Morten Schou: [morten.schou.04@regionh.dk](mailto:morten.schou.04@regionh.dk); Philip  
33 Hasbak: [Philip.Hasbak@regionh.dk](mailto:Philip.Hasbak@regionh.dk); Andreas Kjær: [Andreas.Kjaer@regionh.dk](mailto:Andreas.Kjaer@regionh.dk); Emil Wolsk:  
34 [emil.wolsk@regionh.dk](mailto:emil.wolsk@regionh.dk); Bo Zerahn: [Bo.Zerahn@regionh.dk](mailto:Bo.Zerahn@regionh.dk); Mikkel Wiberg: [Mikkel\\_Wiberg@hotmail.com](mailto:Mikkel_Wiberg@hotmail.com)  
35 Niels Brandt: [niels.hoeeg.brandt-jacobsen@regionh.dk](mailto:niels.hoeeg.brandt-jacobsen@regionh.dk); Peter Gæde: [peter.haulund.gaede@regionh.dk](mailto:peter.haulund.gaede@regionh.dk);  
36 Peter Rossing: [peter.rossing@regionh.dk](mailto:peter.rossing@regionh.dk); Jens Faber: [Jens.Faber@regionh.dk](mailto:Jens.Faber@regionh.dk); Silvio E. Inzucchi:  
37 [silvio.inzucchi@yale.edu](mailto:silvio.inzucchi@yale.edu); Finn Gustafsson: [Finn.Gustafsson@regionh.dk](mailto:Finn.Gustafsson@regionh.dk); Caroline Kistorp:  
38 [caroline.michaela.kistorp@regionh.dk](mailto:caroline.michaela.kistorp@regionh.dk)  
39  
40

41  
42 **Word count: 3147**

43  
44 **Mesh terms: Diabetes Mellitus, Type 2; Sodium-Glucose Transporter 2 Inhibitors, Cardiovascular**  
45 **Diseases, Myocardial Perfusion Imaging, Cardiac Catheterization**  
46

47  
48 **Correspondence to: Caroline Kistorp, Medicinsk Endokrinologisk Klinik, Rigshospitalet, Blegdamsvej 9,**  
49 **2100 Copenhagen; +45 3545 9642; [caroline.michaela.kistorp@regionh.dk](mailto:caroline.michaela.kistorp@regionh.dk)**  
50

51  
52 **ABSTRACT**  
53  
54  
55  
56  
57  
58  
59  
60

---

1  
2  
3  
4 **Introduction:** A diagnosis of type 2 diabetes (T2D) more than doubles the risk of cardiovascular disease  
5  
6 (CVD), with heart failure (HF) being one of the most common complications with a severe prognosis.  
7  
8

9  
10 The landmark EMPA-REG study demonstrated that treatment with the sodium glucose cotransporter-2  
11  
12 (SGLT-2) inhibitor empagliflozin rapidly and significantly reduces CVD mortality and admission rates  
13  
14 for HF. However, the mechanisms behind this reduction in clinical events are unknown.  
15  
16

17 The current study was designed to investigate the effects of the SGLT-2 inhibitor empagliflozin on  
18  
19 myocardial perfusion and function in patients with T2D and high CVD risk.  
20  
21

22 **Methods and analysis:** In this investigator-initiated, randomized, double-blind controlled clinical trial,  
23  
24 92 patients with T2D and established CVD or high CVD risk, will be randomized to treatment with  
25  
26 empagliflozin 25 mg or a matching placebo for 13 weeks. The primary outcome measure is change in  
27  
28 myocardial flow reserve measured quantitatively by Rubidium-82 position emission tomography (<sup>82</sup>Rb-  
29  
30 PET). In a substudy, invasive hemodynamics at rest and during exercise will be measured at baseline  
31  
32 and following the intervention, using right heart catheterization.  
33  
34  
35  
36  
37

38 **Ethics and dissemination:** The study protocol (v7, 02/08/2018) has been approved by the Ethics  
39  
40 Committee of the Capital Region, Danish Data Protection Board and the Danish Medicines Agency, and  
41  
42 it will be monitored according to the Good Clinical Practice (GCP) regulations from the International  
43  
44 Conference on Harmonization.  
45  
46  
47

48 **Trial Registration:** ClinicalTrials.gov Identifier: NCT03151343  
49  
50  
51  
52  
53

## 54 ARTICLE SUMMARY

### 55 Strengths and limitations of this study:

- 56 • Double-blinded, randomized and placebo controlled.  
57  
58  
59  
60

- The use of advanced imaging techniques.
- Single-center
- No hard endpoints, all outcomes are based on surrogates

## INTRODUCTION

Type 2 diabetes (T2D) is a significant risk factor for cardiovascular disease (CVD), including heart failure (HF), and improved glycaemic control is only modestly beneficial in reducing macrovascular disease.<sup>1</sup>

In 2008, prompted by concerns that the T2D drug rosiglitazone might increase the risk of myocardial infarction, the U.S. Food & Drug Administration published guidelines effectively mandating large cardiovascular outcome trials for new T2D drugs. Several such trials have been completed or are ongoing. The trials have primarily examined the safety of dipeptidyl peptidase 4 (DPP-IV) inhibitors, glucagon-like peptide-1 receptor agonists (GLP-1 RA) and sodium–glucose cotransporter 2 (SGLT2) inhibitors.<sup>2–8</sup> The DPP-IV inhibitor trial SAVOR-TIMI indicated an increase in the secondary endpoint, hospitalization due to HF with the active comparator, while another DPP-IV trial, TECOS, as well as the newly published CARMELINA did not demonstrate an increased risk with the active drug. The GLP-1 RA trials LEADER and SUSTAIN although with a reduction in the primary MACE endpoint were neutral with regards to risk of HF. Most of the SGLT-2 trials have demonstrated CV benefits<sup>9</sup> via a reduction of the primary endpoint MACE. In the EMPA-REG outcome study, the SGLT-2 inhibitor empagliflozin reduced the risk of CV death by 38% and in contrast to the GLP-1 RA trials, admission due to HF by 35% in a high-risk T2D population.<sup>6</sup>

The novel evidence from the SGLT-2 inhibitor trials was surprising, because the treatments only had a modest effect on classical CV risk factors. Indeed, the mechanism behind their profound effect on CV death and risk of HF remains unknown, although several hypotheses have been proposed. An effect reducing the atherosclerotic burden is considered unlikely, because the risk of CV events was reduced within weeks of treatment. Thus, the cardioprotective effect might be functional rather than anatomical. Impaired myocardial microcirculation is considered to play a significant role in T2D-related CVD<sup>10</sup> as well as in HF with preserved ejection fraction.<sup>11</sup> Furthermore, coronary vascular dysfunction, particularly decreased vasodilator capacity, is a significant predictor for CV death in patients with T2D.<sup>12,13</sup> Notably, T2D patients with preserved coronary vasodilation had the same low risk of CVD as subjects without diabetes<sup>12</sup>. Experimental studies have shown that SGLT-2 inhibitor treatment significantly ameliorates coronary arterial and aortic (media) thickening, pericoronary arterial fibrosis and improves vasodilatation in diabetic rodents.<sup>14,15</sup> Thus, part of the underlying effect of empagliflozin in EMPA-REG could be driven by improvement in myocardial microcirculation.

1  
2  
3  
4 A complementary hypothesis has been suggested to explain the early beneficial effects on HF  
5 hospitalization found in the EMPA-REG trial.<sup>16</sup> Inhibition of SGLT-2 is associated with increased diuresis, thus  
6 the sodium- and volume-reducing effect could favour cardiac loading conditions in patients with T2D with  
7 subclinical dysfunctions of the heart. The proposed effects on central hemodynamics, especially right and  
8 left heart filling pressures and cardiac output, can be measured directly by right heart catheterization.  
9 Pulmonary capillary wedge pressure (PCWP), a measure of left heart filling pressure, has previously been  
10 shown to be associated with functional capacity among patients with HF.<sup>17</sup> Therefore, investigating the effect  
11 of SGLT-2 inhibitor on central hemodynamics during rest and exercise may contribute vital knowledge on the  
12 mechanisms behind the markedly reduced risk of admission for HF demonstrated in the EMPA-REG and  
13 DECLAIRE TIMI trials<sup>6,8</sup>.

21 The pathogenesis of myocardial dysfunction in T2D has been linked with insulin resistance (IR)  
22 and adipose tissue dysfunction, with an increased supply of free fatty acids (FFA) and adipocytokines  
23 mediating ectopic fat storage and thus increased intra-myocardial lipid accumulation, with decremental  
24 impact on cardiac function.<sup>18</sup> Increased glycosuria with SGLT-2 inhibitors could improve IR by indirectly  
25 increasing peripheral glucose uptake<sup>19</sup> through a reduction in glucose toxicity. Moreover they induce a small  
26 increase in plasma ketone bodies, which may serve as a preferred fuel source for the myocardium.<sup>20</sup>  
27 Therefore, further knowledge on the effects of SGLT-2 inhibitors on metabolic parameters, including  
28 dysfunctional adipose tissue and the relationship with parameters on cardiac function in patients with T2D  
29 is warranted.

37 In summary, SGLT2 inhibitors have been shown to reduce CVD in high-risk T2D patients, with several  
38 explanatory hypotheses being suggested that remain to be tested in clinical trials.

## 42 Hypothesis

43 Treatment with empagliflozin for 13 weeks improves the myocardial flow reserve (MFR) in patients with  
44 T2D and high cardiovascular risk.

## 48 Objectives

50 The primary objective of the current trial is to evaluate the effect of empagliflozin on MFR as measured by  
51 <sup>82</sup>Rb-PET compared to placebo in patients with T2D and CVD or additional CV risk factors. In a sub study,  
52 the effect of empagliflozin on key hemodynamic parameters will be measured during right heart  
53 catheterization at rest and during exercise. Key secondary outcomes include changes in cardiac  
54 echocardiographic evaluations of systolic and diastolic functions, functional capacity by accelerometry, and  
55 changes in glucose metabolism, plasma ketone bodies and adipose tissue function.

## METHODS AND ANALYSIS

### Trial design

This is an investigator-initiated, randomized, placebo-controlled, double-blind trial. Participants will be recruited from the T2D and cardiology outpatient clinics at Herlev-Gentofte University Hospital, Steno Diabetes Center Copenhagen and Rigshospitalet, Denmark.

### Study population

The study will include 92 patients with T2D who have either additional CV risk factors or pre-existing CVD. Detailed inclusion and exclusion criteria are listed in Table 1. Eligible patients will be invited for screening, and patients who meet all the criteria will be randomized to the double-blinded treatment. Participants will be considered part of the intention to treat (ITT) group after receiving the first dose of the study medication”

### Trial Intervention

Participants will be randomized 1:1 to either empagliflozin 25 mg or matching placebo once daily for 13 weeks. The trial medication will be randomized in computer-generated 1:1 blocks of 10 by the study pharmacy (Glostrup Pharmacy, Copenhagen, Denmark). Participants will receive randomization numbers and the corresponding medication containers sequentially. In case of medical emergency, participants can be unblinded individually.

### Trial visits and procedures

#### Visits

A schematic overview of the trial visits is presented in Table 2. At the screening visit ( $V_0$ ), informed consent will be obtained, and patients will be assessed for eligibility based on medical histories, physical examinations and blood samples. Ineligible participants will be counted as screen failures, and the reason for screen failure will be recorded.

Outcome-related procedures are performed at the baseline ( $V_1$ ) and after 13 weeks of treatment ( $V_3$ ). The trial medication will be dispensed when all the procedures pertaining to  $V_1$  have been completed.

After 3 to 6 weeks of treatment, the participants will visit the trial site for blood tests and a physical examination ( $V_2$ ). Participant status and compliance as well as adverse events will be assessed at  $V_2$ ,  $V_3$  and during two phone calls ( $T_1$  and  $T_2$ ).

#### $^{82}\text{Rb}$ -PET

1  
2  
3  
4 Myocardial perfusion and myocardial flow reserve (MFR) will be measured using cardiac  $^{82}\text{Rb}$ -PET, which  
5 allows for flow quantification in absolute terms. To determine the MFR, measurements will be performed  
6 at rest and during adenosine-induced stress. A standard clinical protocol will be used. Participants will be  
7 scanned in the supine position using a Siemens Biograph mCT/PET 128-slice scanner (Siemens Medical  
8 Solutions, Knoxville, USA). Low-dose non-contrast CT will be acquired for attenuation correction as well as  
9 measurement of cardiac adipose tissue volume. Approximately 1100 MBq of  $^{82}\text{Rb}$  will be obtained from a  
10 CardioGen-82 Sr-82/Rb-82 generator (Bracco Diagnostics, Inc., Princeton, New Jersey, USA) and  
11 intravenously infused with a constant flowrate of 50 mL/min. List-mode 3D data acquisition will begin with  
12 the tracer infusion and continue for 7 minutes. Static and ECG-gated images will be reconstructed with a  
13 2.5-minute delay to allow  $^{82}\text{Rb}$  to clear from the blood pool. Maximal hyperaemia will be induced with  
14 adenosine infused at 140  $\mu\text{g}/\text{kg}/\text{min}$  for 6 minutes. After 2.5 minutes of adenosine infusion, intravenous  
15  $^{82}\text{Rb}$  infusion and list-mode acquisition will follow the same protocol as for rest. Myocardial blood perfusion  
16 quantification (in mL/min/g) will be performed using Cedars-Sinai QGS+QPS 2015.6 software (Cedars-Sinai  
17 Medical Center), which is based on a single-compartment model for Rb-82 tracer kinetics.  
18  
19  
20  
21  
22  
23  
24  
25  
26  
27  
28  
29  
30

### 31 **Hemodynamics sub-study**

32 In a substudy, 38 participants randomly selected from the primary study population will perform a  
33 graded exercise test until maximal exertion using a supine ergometer with simultaneous invasive  
34 hemodynamic measurements. Using local anaesthesia, A Swan-Ganz catheter will be placed into the  
35 pulmonary artery via the right internal jugular vein. The following hemodynamic variables will be  
36 assessed: pulmonary capillary wedge pressure (PCWP), cardiac output (CO) using thermodilution,  
37 central venous pressure (CVP and pulmonary artery pressure (PAP). Following measurements at rest,  
38 participants will be transferred to a supine bicycle ergometer, and the measurements will be repeated  
39 (leg-raise situation). The participant will be instructed to pedal at 60 rpm and the workload is  
40 incrementally increased at steps of 10watts. Measurements during exercise will be obtained at 25 watts  
41 and during peak exercise. Blood sampled from the pulmonary vein will be obtained at rest, 25 watts and  
42 at peak exercise for analyses of lactate, oxygen saturation and other blood gas variables.  
43  
44  
45  
46  
47  
48  
49  
50  
51  
52  
53

### 54 **Echocardiography**

55 Echocardiographic measurements will be obtained using 3D and 2D imaging at rest: left ventricular  
56 ejection fraction (LVEF), left ventricle (LV) end-diastolic and end-systolic diameter, LV mass and left atrial  
57 volume. From pulsed-wave Doppler mitral inflow curves, E-wave, A-wave, E-decT and isovolumetric  
58  
59  
60



1  
2  
3  
4 relaxation time will be recorded. Tissue Doppler imaging will be obtained in the apical four-chamber,  
5 two-chamber and apical long-axis to evaluate peak systolic ( $s'$ ), early diastolic ( $e'$ ) and late diastolic ( $a'$ )  
6 velocities during the ejection period. Strain measures of LV (radial, circumferential and longitudinal  
7 speckle tracking) will be assessed via 2D echocardiography.  
8  
9  
10  
11  
12

### 13 **Cr-51 EDTA**

14 The Cr-51 EDTA method will be used to measure GFR. A single intravenous administration of 3.7MBq of  
15 Cr-51 EDTA is given. A venous sample is drawn four hours after administration.  
16  
17  
18  
19

### 20 **Accelerometry**

21 A patient-worn accelerometer will be used to assess daily activity level. The patient will wear the  
22 accelerometer continuously for 7 days, except for bathing and swimming.  
23  
24  
25

### 26 **Ambulatory blood pressure**

27 24-hour ambulatory blood pressures will be obtained using a Mobil-O-Graph New Generation 24h ABPM  
28 Classic (Siemens, Germany) set to measure blood pressure every 20 minutes during the daytime and  
29 every hour during the night.  
30  
31  
32  
33  
34

### 35 **Adipose tissue biopsy**

36 Biopsies will be obtained from the abdominal subcutaneous tissue during a fasting state using the  
37 Bergstrom needle technique. Total mRNA will be extracted from adipose tissue with commercially  
38 available lipid tissue kits to measure mRNA expression of adipocytokines. Quantification of inflammatory  
39 cells will be performed according to validated histological procedures.  
40  
41  
42  
43  
44  
45

### 46 **Oral Glucose Tolerance Test (OGTT)**

47 The fasting participant will drink a solution of 75g of glucose. Blood will be drawn at time points 0, 30,  
48 60 and 120 minutes, and measurements of plasma glucose, C-peptide and plasma insulin will be taken.  
49  
50  
51

### 52 **Questionnaires**

53 Participants will complete the EQ-5D-5L and the Minnesota Living with Heart Failure questionnaires.  
54  
55  
56

### 57 **Heart rate variability (HRV)**

58  
59  
60

1  
2  
3  
4 Heart rate variability will be measured using the Vagus™ handheld device. Heart rate response will be  
5 measured at rest, while rising from a lying position to standing upright, during deep in- and expiration  
6 and while performing the Valsalva maneuver.  
7  
8  
9

### 10 11 **Pulse wave analysis (PWA)**

12 Arterial stiffness will be measured using PWA. The procedure will be performed using a SphygmoCor  
13 device (version 7.0, Atcor Medical, Sydney, Australia) at the right radial artery.  
14  
15  
16

### 17 18 **Body composition**

19 Body composition will be measured by Dual-energy X-ray absorptiometry (DXA) (Hologic Discovery DXA  
20 scanner, Hologic Inc., Bedford, USA) based on fat free, fat and bone mass. Supplementary software  
21 provides a novel method for differentiating between visceral and subcutaneous abdominal fat.  
22  
23  
24  
25

### 26 27 **Urine and blood samples, fasting**

28 Standard blood analyses will be performed immediately after sampling. Blood and urine samples for  
29 specialized biomarkers will be stored at -80°C until batch analysis can be performed.  
30  
31  
32  
33  
34

## 35 **ENDPOINTS**

### 36 37 **Primary outcome measurement**

38 The effect of empagliflozin 25 mg once daily for 13 weeks, compared with placebo on the myocardial flow  
39 reserve MFR assessed by <sup>82</sup>Rb-PET  
40  
41

### 42 **Key sub-study measurement**

43 The effect of empagliflozin compared with placebo on PCWP at a workload of 25 watts  
44  
45  
46

### 47 48 **Secondary outcome measurements**

49 The effect of empagliflozin compared with placebo on the following:  
50

- 51 - Global left and right heart function
- 52 - Renal function by Cr51-EDTA plasma clearance
- 53 - Cardiac adipose tissue volume
- 54 - PCWP at peak exercise, corrected to body weight
- 55 - Plasma NT-proBNP concentrations
- 56 - Daily activity levels
- 57 - Body fat distribution and visceral vs. subcutaneous abdominal fat using DXA
- 58
- 59
- 60

- Ambulatory systolic and diastolic blood pressures
- Quality of life assessed by the Minnesota Living with Heart Failure and the EuroQol EQ-5D-5L questionnaires
- Plasma beta-hydroxy butyrate levels
- Adipose tissue mRNA expression levels of TNF- $\alpha$ , COL1-A1 and monocyte chemoattractant protein 1 (MCP1)

## STATISTICAL ANALYSIS

### SAMPLE SIZE

#### Primary endpoint

The primary endpoint is change in MFR. In a previous study on a comparable population, the SD of measurements of MFR by  $^{82}\text{Rb}$  PET was 0.8. Assuming a clinically relevant difference between the treatment and placebo groups after 6 months of 0.5 in MFR,<sup>21</sup> a sample size of 41:41 (empagliflozin: placebo) can be detected with 80% power and a two-sided significance level of 5%. In all, 92 patients will be randomized to allow for a 10% drop-out rate from the intention-to-treat (ITT) population.

#### Sub-study key endpoint

Based on recent experiments in a comparable study population,<sup>22</sup> a difference of 5 mmHg in PCWP during exercise was considered clinically significant. The SD of measurements of PCWP was 5 mmHg; thus, a sample size of 16:16 is required with a power of 80% and a two-sided significance level of 5% to detect a difference of 5 mmHg between groups. In total 38 patients will be included in the sub-study to allow for a 15% drop-out rate.

In the ITT population, none of the randomized participants will be excluded, and the patients will be analysed according to the randomization group. The per-protocol population will consist of all the patients who completed the study with a documented valid baseline and a final-week assessment of the primary objective without any major protocol violations. Analysis of the primary outcome parameter will focus on a change in global MBF from the baseline to week 13 between the treatment and control groups. The primary analysis will be based on the ITT population. The primary outcome measure will be analysed using ANCOVA with treatment as a factor and the baseline value as a covariate. The model will include the prespecified covariates age and gender. Missing data will be estimated using the maximum likelihood method. Normally distributed variables will be presented as mean  $\pm$ SD, and non-parametric statistics or appropriate log transformation will be performed if an assumption of normality is not met. After log transformation, the variable will be further tested for normality distribution as indicated. A two-tailed  $p$  value of less than 0.05 will be considered statistically significant.

1  
2  
3  
4 Comparisons between the treatment groups will be performed by an unpaired two sample *t*-test, Mann-  
5 Whitney test or  $\chi^2$  - test as appropriate.  
6  
7

## 8 9 Data management

10 Source data will be recorded in the patient record or in case report forms (CRF). The requirements for  
11 entering source data directly into the CRF are that the data are obtained directly from the patient either by  
12 clinical assessment, interview or point-of-care systems with no printout function and that no more reliable  
13 forms of data capture are available. Medical history, height and weight are examples of such data.  
14 A CRF will be constructed for data capture. Data will be stored in coded form for 5 years according to  
15 recommendations from the Danish Data Protection Agency; thereafter, data will be transferred to the  
16 Danish Data Archives.  
17  
18  
19  
20  
21  
22  
23  
24  
25

## 26 Study medication

27  
28 *Name:* Jardiance® (empagliflozin) or a visually identical matching placebo

29  
30 *Pharmaceutical Form:* Tablet for oral use

31  
32 *Pharmaceutical Dosage:* Jardiance® or a placebo will be introduced at a dose of 25 mg/day.

33 Intake of the tablet can be done at any time during the day; however, it is recommended that the time of  
34 intake be consistent from day to day.  
35

36  
37 *Side effects:* Very common side effects (> 10%): Hypoglycaemia (when taken in conjunction with insulin or  
38 sulfonylureas); Common side effects (1–10%): Skin itching, balanitis, frequent urination, vaginal candidiasis,  
39 vulvovaginitis  
40

41  
42 *Shipping and packing:* All trial products will be delivered, packed and labelled by Glostrup Pharmacy.

43  
44 *Randomization:* Electronic randomization in blocks of 10 will be provided by Glostrup Pharmacy. The  
45 randomization list will be stored in a locked cabinet. The patients will be assigned consecutive  
46 randomization numbers. Prior to randomization, the patients will be identified by patient numbers which  
47 will be assigned consecutively, and patients will retain these numbers following randomization.  
48

## 49 Concomitant medication

50  
51 Treatment with herbal medicines is not allowed, but otherwise, there are no restrictions on concomitant  
52 medication apart from SGLT2-inhibitors. Before enrolment, participants will confirm that they are receiving  
53 optimal T2D therapy, and during the trial, T2D and CV risk or disease will be managed according to the best  
54 available evidence.  
55  
56  
57  
58  
59  
60

1  
2  
3  
4  
5  
6  
7  
8  
9  
10  
11  
12  
13  
14  
15  
16  
17  
18  
19  
20  
21  
22  
23  
24  
25  
26  
27  
28  
29  
30  
31  
32  
33  
34  
35  
36  
37  
38  
39  
40  
41  
42  
43  
44  
45  
46  
47  
48  
49  
50  
51  
52  
53  
54  
55  
56  
57  
58  
59  
60

## ETHICS AND DISSEMINATION

The study, which will be conducted in accordance with the latest revision of the Helsinki Declaration, EU directive on GCP and ICH-GCP guidelines, has been approved by the Regional Scientific Ethics Committee, the Danish Medicines Agency and the Danish Data Protection Agency. The study is registered at [clinicaltrials.gov](http://clinicaltrials.gov) and monitored by the GCP unit at Bispebjerg University Hospital. The results of the project will be submitted to international peer-reviewed journals regardless of their outcome, and the data will be made available to the public via EudraCT and [www.clinicaltrials.gov](http://www.clinicaltrials.gov). Furthermore, the results will be presented at conferences as abstracts and posters.

### Author affiliations:

<sup>1</sup>Centre of Endocrinology and Metabolism, Department of Internal Medicine, Copenhagen University Hospitals Herlev/Gentofte, Herlev, Denmark.

<sup>2</sup>Department of Cardiology, Copenhagen University Hospitals Herlev/Gentofte, Herlev, Denmark.

<sup>3</sup>Institute of Clinical Medicine, Faculty of Health and Medical Sciences, University of Copenhagen, Copenhagen, Denmark

<sup>4</sup>Department of Clinical Physiology, Nuclear Medicine & PET and Cluster for Molecular Imaging, Department of Biomedical Sciences, Rigshospitalet and University of Copenhagen, Copenhagen, Denmark.

<sup>5</sup>Department of Cardiology, The Heart Centre, Rigshospitalet Copenhagen University Hospital, Copenhagen, Denmark

<sup>6</sup>Department of Clinical Physiology and Nuclear Medicine, Copenhagen University Hospitals Herlev/Gentofte, Herlev, Denmark.

<sup>7</sup>Department of Endocrinology, Rigshospitalet Copenhagen University Hospital, Copenhagen, Denmark.

<sup>8</sup>Slagelse Hospital, Slagelse, Denmark; University of Southern Denmark, Odense, Denmark.

<sup>9</sup>Steno Diabetes Center Copenhagen, Gentofte, Denmark.

<sup>10</sup>Yale Section of Endocrinology, Yale University School of Medicine, New Haven, CT, USA

### Author Contributions:

CK, MS, FG, AK, PH, JF, BZ, SI and MJ conceived the study and participated in its design, planning and coordination. CK, MS, MW, PG and MJ are responsible for the inclusion and examination of patients at Herlev-Gentofte and Rigshospitalet University Hospital. AK and PH are responsible for the <sup>82</sup>Rb-PET measurements and FG, EW for the hemodynamics experiments at Rigshospitalet University Hospital.

### Funding:

This work is supported by the department of Internal Medicine at Herlev Hospital; the Research council of Herlev Hospital; The Danish Heart Foundation, grant number 16-R107-A6697; The Hartmann Foundation, The Toyota Foundation and by a Steno Collaborative Grant 2018.

ClinicalTrials.gov Identifier: NCT03151343

### Competing interests:

1  
2  
3  
4 PR has received consultancy and/or speaking fees (to his institution) from AbbVie, Astellas, AstraZeneca,  
5 Bayer, Boehringer Ingelheim, Bristol-Myers Squibb, Eli Lilly, MSD, Novo Nordisk and Sanofi Aventis and has  
6 received institutional research grants from AbbVie, AstraZeneca and Novo Nordisk.  
7  
8  
9  
10

## 11 REFERENCES

- 12 1. Turner R. Intensive blood-glucose control with sulphonylureas or insulin compared with  
13 conventional treatment and risk of complications in patients with type 2 diabetes (UKPDS 33).  
14 *Lancet*. 1998;352(9131):837-853. doi:10.1016/S0140-6736(98)07019-6
- 15 2. Scirica BM, Bhatt DL, Braunwald E, et al. Saxagliptin and Cardiovascular Outcomes in Patients with  
16 Type 2 Diabetes Mellitus. *N Engl J Med*. 2013;369(14):1317-1326. doi:10.1056/NEJMoa1307684
- 17 3. Green JB, Bethel MA, Armstrong PW, et al. Effect of Sitagliptin on Cardiovascular Outcomes in Type  
18 2 Diabetes. *N Engl J Med*. 2015;373(3):232-242. doi:10.1056/NEJMoa1501352
- 19 4. Pfeffer MA, Claggett B, Diaz R, et al. Lixisenatide in Patients with Type 2 Diabetes and Acute  
20 Coronary Syndrome. *N Engl J Med*. 2015;373(23):2247-2257. doi:10.1056/NEJMoa1509225
- 21 5. White WB, Cannon CP, Heller SR, et al. Alogliptin after Acute Coronary Syndrome in Patients with  
22 Type 2 Diabetes. *N Engl J Med*. 2013;369(14):1327-1335. doi:10.1056/NEJMoa1305889
- 23 6. Zinman B, Wanner C, Lachin JM, et al. Empagliflozin, Cardiovascular Outcomes, and Mortality in  
24 Type 2 Diabetes. *N Engl J Med*. 2015;373(22):2117-2128. doi:10.1056/NEJMoa1504720
- 25 7. Guthrie R. Canagliflozin and cardiovascular and renal events in type 2 diabetes. *Postgrad Med*.  
26 2018;130(2):149-153. doi:10.1080/00325481.2018.1423852
- 27 8. Wiviott SD, Raz I, Bonaca MP, et al. Dapagliflozin and Cardiovascular Outcomes in Type 2 Diabetes. *N*  
28 *Engl J Med*. 2018;NEJMoa1812389. doi:10.1056/NEJMoa1812389
- 29 9. Cefalu WT, Kaul S, Gerstein HC, et al. Cardiovascular outcomes trials in type 2 diabetes: Where Do  
30 We Go From Here? Ref lections From a Diabetes Care Editors' Expert Forum. *Diabetes Care*.  
31 2018;41(1):14-31. doi:10.2337/dci17-0057
- 32 10. Avogaro A, Albiero M, Menegazzo L, De Kreutzenberg S, Fadini GP. Endothelial dysfunction in  
33 diabetes: The role of reparatory mechanisms. *Diabetes Care*. 2011;34(SUPPL. 2):285-290.  
34 doi:10.2337/dc11-s239
- 35 11. Srivaratharajah K, Coutinho T, Dekemp R, et al. Reduced myocardial flow in heart failure patients  
36 with preserved ejection fraction. *Circ Hear Fail*. 2016;9(7).  
37 doi:10.1161/CIRCHEARTFAILURE.115.002562
- 38 12. Murthy VL, Naya M, Foster CR, et al. Association between coronary vascular dysfunction and cardiac  
39 mortality in patients with and without diabetes mellitus. *Circulation*. 2012;126(15):1858-1868.  
40 doi:10.1161/CIRCULATIONAHA.112.120402
- 41 13. Cortigiani L, Rigo F, Gherardi S, et al. Additional Prognostic Value of Coronary Flow Reserve in  
42 Diabetic and Nondiabetic Patients With Negative Dipyridamole Stress Echocardiography by Wall  
43 Motion Criteria. *J Am Coll Cardiol*. 2007;50(14):1354-1361. doi:10.1016/j.jacc.2007.06.027
- 44  
45  
46  
47  
48  
49  
50  
51  
52  
53  
54  
55  
56  
57  
58  
59  
60

1  
2  
3  
4  
5  
6  
7  
8  
9  
10  
11  
12  
13  
14  
15  
16  
17  
18  
19  
20  
21  
22  
23  
24  
25  
26  
27  
28  
29  
30  
31  
32  
33  
34  
35  
36  
37  
38  
39  
40  
41  
42  
43  
44  
45  
46  
47  
48  
49  
50  
51  
52  
53  
54  
55  
56  
57  
58  
59  
60

14. Lin B, Koibuchi N, Hasegawa Y, et al. Glycemic control with empagliflozin, a novel selective SGLT2 inhibitor, ameliorates cardiovascular injury and cognitive dysfunction in obese and type 2 diabetic mice. *Cardiovasc Diabetol*. 2014;13(1). doi:10.1186/s12933-014-0148-1
15. Oelze M, Kröller-Schön S, Welschof P, et al. The sodium-glucose co-transporter 2 inhibitor empagliflozin improves diabetes-induced vascular dysfunction in the streptozotocin diabetes rat model by interfering with oxidative stress and glucotoxicity. *PLoS One*. 2014;9(11):e112394. doi:10.1371/journal.pone.0112394
16. Sattar N, McLaren J, Kristensen SL, Preiss D, McMurray JJ. SGLT2 Inhibition and cardiovascular events: why did EMPA-REG Outcomes surprise and what were the likely mechanisms? *Diabetologia*. 2016:1-7. doi:10.1007/s00125-016-3956-x
17. Emil W, David K, A. BB, et al. Resting and exercise haemodynamics in relation to six-minute walk test in patients with heart failure and preserved ejection fraction. *Eur J Heart Fail*. 2017;20(4):715-722. doi:10.1002/ejhf.976
18. Sharma S, Adroque J V, Golfman L, et al. Intramyocardial lipid accumulation in the failing human heart resembles the lipotoxic rat heart. *FASEB J*. 2004;18(14):1692-1700. doi:10.1096/fj.04-2263com
19. Ferrannini E, Muscelli E, Frascerra S, et al. Metabolic response to sodium-glucose cotransporter 2 inhibition in type 2 diabetic patients. *J Clin Invest*. 2014;124(2):499-508. doi:10.1172/JCI72227.uptake
20. Ferrannini E, Mark M, Mayoux E. CV Protection in the EMPA-REG OUTCOME Trial: A “Thrifty Substrate” Hypothesis. *Diabetes Care*. 2016;(March):dc160330. doi:10.2337/dc16-0330
21. von Scholten BJ, Hasbak P, Christensen TE, et al. Cardiac 82Rb PET/CT for fast and non-invasive assessment of microvascular function and structure in asymptomatic patients with type 2 diabetes. *Diabetologia*. 2016;59(2):371-378. doi:10.1007/s00125-015-3799-x
22. Andersen MJ, Ersbøll M, Axelsson A, et al. Sildenafil and diastolic dysfunction after acute myocardial infarction in patients with preserved ejection fraction: The sildenafil and diastolic dysfunction after acute myocardial infarction (SIDAMI) trial. *Circulation*. 2013;127(11):1200-1208. doi:10.1161/CIRCULATIONAHA.112.000056

**Inclusion criteria**

- ▶ T2D (WHO criteria), diagnosed at least 3 months before screening
- ▶ For patients on background therapy: stable dose of anti-diabetic therapy within 30 days prior to baseline
- ▶ Hba1c of  $\geq 48$  mmol/L and  $\leq 86$  mmol/L at screening for patients on background therapy or Hba1c of  $\geq 48$  mmol/L and  $\leq 75$  mmol/L at screening for drug-naïve patients
- ▶ Age  $\geq 18$  years
- ▶ BMI  $\leq 45$  kg/m
- ▶ Negative pregnancy test (fertile women). Fertile women must use safe contraceptives (spiral, hormonal contraceptives) for the duration of the study
- ▶ Able to understand the written patient information and to give informed consent
- ▶ High cardiovascular risk, defined as at least one of the following:
  - ACR  $\geq 30$  mg/g
  - NT-proBNP  $\geq 70$  pg/mL
  - Confirmed history of myocardial infarction  $> 2$  months prior to baseline
  - Heart failure according to Framingham Heart Failure Criteria
  - Discharged from hospital with a documented diagnosis of UA  $\leq 12$  months prior to baseline
  - Evidence of coronary artery disease by CAG in one or more major coronary arteries OR at least one of the following: a positive noninvasive stress test, or a positive stress echocardiography showing regional systolic wall motion abnormalities, or a positive scintigraphic test showing stress-induced ischemia
  - History of ischemic or hemorrhagic stroke  $> 2$  months prior to informed consent
  - Presence of peripheral artery disease such as: previous limb angioplasty, stenting or bypass surgery; or previous limb or foot amputation due to circulatory insufficiency; or angiographic evidence of significant ( $> 50\%$ ) peripheral artery stenosis in at least one limb; or evidence from a non-invasive measurement of significant ( $>50\%$  or as reported as hemodynamically significant) peripheral artery stenosis in at least one limb; or ankle brachial index of  $< 0.9$

**Exclusion criteria**

- ▶ Allergic to the study medication
- ▶ Treatment with SGLT-2 inhibitor within 1 month prior to baseline
- ▶ Impaired kidney function, eGFR  $\leq 30$  ml/min
- ▶ Severe liver insufficiency (Child-Pugh class C)
- ▶ ECG showing malignant ventricular arrhythmia or prolonged QT-interval ( $>500$ ms)
- ▶ Untreated clinically significant heart valve disease
- ▶ Planned cardiac surgery or angioplasty within 3 months.
- ▶ Myocardial infarction (MI)  $\leq 30$  days prior to baseline
- ▶ Percutaneous coronary intervention (PCI)  $\leq 4$  weeks prior to baseline
- ▶ History of coronary artery bypass graft (CABG)  $\leq 8$  weeks prior to enrollment
- ▶ Prior history of heart transplantation
- ▶ Unstable angina, known severe left main coronary artery stenosis, severe heart failure, uncontrolled arrhythmias, symptomatic hypotension or severe hypertension (systolic blood pressure  $< 90$  or  $> 180$  mmHg, respectively), sick sinus syndrome or  $> 1$  first degree atrioventricular block in the absence of a functioning pacemaker



**Table 2 Overview of study visits**

| Visit                           | V <sub>0</sub> | V <sub>1</sub> | T <sub>1</sub> | V <sub>2</sub> | T <sub>2</sub> | V <sub>3</sub> |
|---------------------------------|----------------|----------------|----------------|----------------|----------------|----------------|
| Time, weeks                     | -4±1           | 0±1            | 2±1            | 4±1            | 8±1            | 12±1           |
| Inclusion/exclusion criteria    | X              | X              |                |                |                |                |
| Medical history                 | X              |                |                |                |                |                |
| Informed consent                | X              |                |                |                |                |                |
| Blood samples, non-fasting      | X              |                |                | X              |                |                |
| Physical examination            | X              |                |                | X              |                |                |
| Adverse events                  |                | X              | X              | X              | X              | X              |
| <b>Endpoints, Main study</b>    |                |                |                |                |                |                |
| <sup>82</sup> Rb -PET           |                | X              |                |                | X              |                |
| Echocardiography                |                | X              |                |                | X              |                |
| Ambulatory BP                   |                | X              |                |                | X              |                |
| Adipose tissue biopsy           |                | X              |                |                | X              |                |
| Oral glucose tolerance test     |                | X              |                |                | X              |                |
| Questionnaires                  |                | X              |                |                | X              |                |
| HRV                             |                | X              |                |                | X              |                |
| PWA                             |                | X              |                |                | X              |                |
| <sup>51</sup> Cr EDTA clearance |                | X              |                |                | X              |                |
| Body composition (DEXA)         |                | X              |                |                | X              |                |
| Blood samples, fasting          |                | X              |                |                | X              |                |
| Urine samples, fasting          |                | X              |                |                | X              |                |
| <b>Endpoints, substudy</b>      |                |                |                |                |                |                |
| Hemodynamics                    |                | X              |                |                | X              |                |
| Accelerometer                   |                | X              |                |                | X              |                |

# Reporting checklist for protocol of a clinical trial.

Based on the SPIRIT guidelines.

## Instructions to authors

Complete this checklist by entering the page numbers from your manuscript where readers will find each of the items listed below.

Your article may not currently address all the items on the checklist. Please modify your text to include the missing information. If you are certain that an item does not apply, please write "n/a" and provide a short explanation.

Upload your completed checklist as an extra file when you submit to a journal.

In your methods section, say that you used the SPIRIT reporting guidelines, and cite them as:

Chan A-W, Tetzlaff JM, Altman DG, Laupacis A, Gøtzsche PC, Krleža-Jerić K, Hróbjartsson A, Mann H, Dickersin K, Berlin J, Doré C, Parulekar W, Summerskill W, Groves T, Schulz K, Sox H, Rockhold FW, Rennie D, Moher D. SPIRIT 2013 Statement: Defining standard protocol items for clinical trials. *Ann Intern Med.* 2013;158(3):200-207

|                                             |     | Reporting Item                                                                                               | Page Number   |
|---------------------------------------------|-----|--------------------------------------------------------------------------------------------------------------|---------------|
| Title                                       | #1  | Descriptive title identifying the study design, population, interventions, and, if applicable, trial acronym | 1             |
| Trial registration                          | #2a | Trial identifier and registry name. If not yet registered, name of intended registry                         | 2             |
| Trial registration: data set                | #2b | All items from the World Health Organization Trial Registration Data Set                                     | See note<br>1 |
| Protocol version                            | #3  | Date and version identifier                                                                                  | 2             |
| Funding                                     | #4  | Sources and types of financial, material, and other support                                                  | 11            |
| Roles and responsibilities: contributorship | #5a | Names, affiliations, and roles of protocol contributors                                                      | 1,11          |
| Roles and responsibilities:                 | #5b | Name and contact information for the trial sponsor                                                           | See note<br>2 |

|    |                      |      |                                                                          |          |
|----|----------------------|------|--------------------------------------------------------------------------|----------|
| 1  | sponsor contact      |      |                                                                          |          |
| 2  | information          |      |                                                                          |          |
| 3  |                      |      |                                                                          |          |
| 4  | Roles and            | #5c  | Role of study sponsor and funders, if any, in study design;              | See note |
| 5  | responsibilities:    |      | collection, management, analysis, and interpretation of data; writing    | 3        |
| 6  | sponsor and funder   |      | of the report; and the decision to submit the report for publication,    |          |
| 7  |                      |      | including whether they will have ultimate authority over any of these    |          |
| 8  |                      |      | activities                                                               |          |
| 9  |                      |      |                                                                          |          |
| 10 |                      |      |                                                                          |          |
| 11 |                      |      |                                                                          |          |
| 12 | Roles and            | #5d  | Composition, roles, and responsibilities of the coordinating centre,     | n/a      |
| 13 | responsibilities:    |      | steering committee, endpoint adjudication committee, data                |          |
| 14 | committees           |      | management team, and other individuals or groups overseeing the          |          |
| 15 |                      |      | trial, if applicable (see Item 21a for data monitoring committee)        |          |
| 16 |                      |      |                                                                          |          |
| 17 |                      |      |                                                                          |          |
| 18 |                      |      |                                                                          |          |
| 19 | Background and       | #6a  | Description of research question and justification for undertaking the   | 2-4      |
| 20 | rationale            |      | trial, including summary of relevant studies (published and              |          |
| 21 |                      |      | unpublished) examining benefits and harms for each intervention          |          |
| 22 |                      |      |                                                                          |          |
| 23 |                      |      |                                                                          |          |
| 24 | Background and       | #6b  | Explanation for choice of comparators                                    | See note |
| 25 | rationale: choice of |      |                                                                          | 4        |
| 26 | comparators          |      |                                                                          |          |
| 27 |                      |      |                                                                          |          |
| 28 |                      |      |                                                                          |          |
| 29 | Objectives           | #7   | Specific objectives or hypotheses                                        | 4        |
| 30 |                      |      |                                                                          |          |
| 31 |                      |      |                                                                          |          |
| 32 | Trial design         | #8   | Description of trial design including type of trial (eg, parallel group, | 4        |
| 33 |                      |      | crossover, factorial, single group), allocation ratio, and framework     |          |
| 34 |                      |      | (eg, superiority, equivalence, non-inferiority, exploratory)             |          |
| 35 |                      |      |                                                                          |          |
| 36 |                      |      |                                                                          |          |
| 37 | Study setting        | #9   | Description of study settings (eg, community clinic, academic            | 4        |
| 38 |                      |      | hospital) and list of countries where data will be collected. Reference  |          |
| 39 |                      |      | to where list of study sites can be obtained                             |          |
| 40 |                      |      |                                                                          |          |
| 41 |                      |      |                                                                          |          |
| 42 | Eligibility criteria | #10  | Inclusion and exclusion criteria for participants. If applicable,        | 14       |
| 43 |                      |      | eligibility criteria for study centres and individuals who will perform  |          |
| 44 |                      |      | the interventions (eg, surgeons, psychotherapists)                       |          |
| 45 |                      |      |                                                                          |          |
| 46 |                      |      |                                                                          |          |
| 47 |                      |      |                                                                          |          |
| 48 | Interventions:       | #11a | Interventions for each group with sufficient detail to allow             | 4-5      |
| 49 | description          |      | replication, including how and when they will be administered            |          |
| 50 |                      |      |                                                                          |          |
| 51 |                      |      |                                                                          |          |
| 52 | Interventions:       | #11b | Criteria for discontinuing or modifying allocated interventions for a    | See note |
| 53 | modifications        |      | given trial participant (eg, drug dose change in response to harms,      | 5        |
| 54 |                      |      | participant request, or improving / worsening disease)                   |          |
| 55 |                      |      |                                                                          |          |
| 56 |                      |      |                                                                          |          |
| 57 | Interventions:       | #11c | Strategies to improve adherence to intervention protocols, and any       | See note |
| 58 | adherence            |      | procedures for monitoring adherence (eg, drug tablet return;             | 6        |
| 59 |                      |      |                                                                          |          |
| 60 |                      |      |                                                                          |          |

|    |                      |                   |                                                                        |
|----|----------------------|-------------------|------------------------------------------------------------------------|
|    |                      | laboratory tests) |                                                                        |
| 1  |                      |                   |                                                                        |
| 2  |                      |                   |                                                                        |
| 3  | Interventions:       | #11d              | Relevant concomitant care and interventions that are permitted or      |
| 4  | concomitant care     |                   | prohibited during the trial                                            |
| 5  |                      |                   |                                                                        |
| 6  | Outcomes             | #12               | Primary, secondary, and other outcomes, including the specific         |
| 7  |                      |                   | measurement variable (eg, systolic blood pressure), analysis metric    |
| 8  |                      |                   | (eg, change from baseline, final value, time to event), method of      |
| 9  |                      |                   | aggregation (eg, median, proportion), and time point for each          |
| 10 |                      |                   | outcome. Explanation of the clinical relevance of chosen efficacy      |
| 11 |                      |                   | and harm outcomes is strongly recommended                              |
| 12 |                      |                   |                                                                        |
| 13 |                      |                   |                                                                        |
| 14 |                      |                   |                                                                        |
| 15 |                      |                   |                                                                        |
| 16 | Participant timeline | #13               | Time schedule of enrolment, interventions (including any run-ins       |
| 17 |                      |                   | and washouts), assessments, and visits for participants. A schematic   |
| 18 |                      |                   | diagram is highly recommended (see Figure)                             |
| 19 |                      |                   |                                                                        |
| 20 |                      |                   |                                                                        |
| 21 | Sample size          | #14               | Estimated number of participants needed to achieve study objectives    |
| 22 |                      |                   | and how it was determined, including clinical and statistical          |
| 23 |                      |                   | assumptions supporting any sample size calculations                    |
| 24 |                      |                   |                                                                        |
| 25 |                      |                   |                                                                        |
| 26 | Recruitment          | #15               | Strategies for achieving adequate participant enrolment to reach       |
| 27 |                      |                   | target sample size                                                     |
| 28 |                      |                   |                                                                        |
| 29 |                      |                   |                                                                        |
| 30 | Allocation: sequence | #16a              | Method of generating the allocation sequence (eg, computer-            |
| 31 | generation           |                   | generated random numbers), and list of any factors for stratification. |
| 32 |                      |                   | To reduce predictability of a random sequence, details of any          |
| 33 |                      |                   | planned restriction (eg, blocking) should be provided in a separate    |
| 34 |                      |                   | document that is unavailable to those who enrol participants or        |
| 35 |                      |                   | assign interventions                                                   |
| 36 |                      |                   |                                                                        |
| 37 |                      |                   |                                                                        |
| 38 |                      |                   |                                                                        |
| 39 |                      |                   |                                                                        |
| 40 | Allocation           | #16b              | Mechanism of implementing the allocation sequence (eg, central         |
| 41 | concealment          |                   | telephone; sequentially numbered, opaque, sealed envelopes),           |
| 42 | mechanism            |                   | describing any steps to conceal the sequence until interventions are   |
| 43 |                      |                   | assigned                                                               |
| 44 |                      |                   |                                                                        |
| 45 |                      |                   |                                                                        |
| 46 |                      |                   |                                                                        |
| 47 | Allocation:          | #16c              | Who will generate the allocation sequence, who will enrol              |
| 48 | implementation       |                   | participants, and who will assign participants to interventions        |
| 49 |                      |                   |                                                                        |
| 50 |                      |                   |                                                                        |
| 51 | Blinding (masking)   | #17a              | Who will be blinded after assignment to interventions (eg, trial       |
| 52 |                      |                   | participants, care providers, outcome assessors, data analysts), and   |
| 53 |                      |                   | how                                                                    |
| 54 |                      |                   |                                                                        |
| 55 |                      |                   |                                                                        |
| 56 | Blinding (masking):  | #17b              | If blinded, circumstances under which unblinding is permissible, and   |
| 57 | emergency            |                   | procedure for revealing a participant's allocated intervention during  |
| 58 |                      |                   |                                                                        |
| 59 |                      |                   |                                                                        |
| 60 |                      |                   |                                                                        |

|    |                                                  |      |                                                                                                                                                                                                                                                                                                                                                                                                              |               |
|----|--------------------------------------------------|------|--------------------------------------------------------------------------------------------------------------------------------------------------------------------------------------------------------------------------------------------------------------------------------------------------------------------------------------------------------------------------------------------------------------|---------------|
| 1  | unblinding                                       |      | the trial                                                                                                                                                                                                                                                                                                                                                                                                    |               |
| 2  |                                                  |      |                                                                                                                                                                                                                                                                                                                                                                                                              |               |
| 3  | Data collection plan                             | #18a | Plans for assessment and collection of outcome, baseline, and other trial data, including any related processes to promote data quality (eg, duplicate measurements, training of assessors) and a description of study instruments (eg, questionnaires, laboratory tests) along with their reliability and validity, if known. Reference to where data collection forms can be found, if not in the protocol | 9             |
| 4  |                                                  |      |                                                                                                                                                                                                                                                                                                                                                                                                              |               |
| 5  |                                                  |      |                                                                                                                                                                                                                                                                                                                                                                                                              |               |
| 6  |                                                  |      |                                                                                                                                                                                                                                                                                                                                                                                                              |               |
| 7  |                                                  |      |                                                                                                                                                                                                                                                                                                                                                                                                              |               |
| 8  |                                                  |      |                                                                                                                                                                                                                                                                                                                                                                                                              |               |
| 9  |                                                  |      |                                                                                                                                                                                                                                                                                                                                                                                                              |               |
| 10 |                                                  |      |                                                                                                                                                                                                                                                                                                                                                                                                              |               |
| 11 |                                                  |      |                                                                                                                                                                                                                                                                                                                                                                                                              |               |
| 12 | Data collection plan: retention                  | #18b | Plans to promote participant retention and complete follow-up, including list of any outcome data to be collected for participants who discontinue or deviate from intervention protocols                                                                                                                                                                                                                    | See note<br>7 |
| 13 |                                                  |      |                                                                                                                                                                                                                                                                                                                                                                                                              |               |
| 14 |                                                  |      |                                                                                                                                                                                                                                                                                                                                                                                                              |               |
| 15 |                                                  |      |                                                                                                                                                                                                                                                                                                                                                                                                              |               |
| 16 |                                                  |      |                                                                                                                                                                                                                                                                                                                                                                                                              |               |
| 17 | Data management                                  | #19  | Plans for data entry, coding, security, and storage, including any related processes to promote data quality (eg, double data entry; range checks for data values). Reference to where details of data management procedures can be found, if not in the protocol                                                                                                                                            | 9             |
| 18 |                                                  |      |                                                                                                                                                                                                                                                                                                                                                                                                              |               |
| 19 |                                                  |      |                                                                                                                                                                                                                                                                                                                                                                                                              |               |
| 20 |                                                  |      |                                                                                                                                                                                                                                                                                                                                                                                                              |               |
| 21 |                                                  |      |                                                                                                                                                                                                                                                                                                                                                                                                              |               |
| 22 |                                                  |      |                                                                                                                                                                                                                                                                                                                                                                                                              |               |
| 23 |                                                  |      |                                                                                                                                                                                                                                                                                                                                                                                                              |               |
| 24 | Statistics: outcomes                             | #20a | Statistical methods for analysing primary and secondary outcomes. Reference to where other details of the statistical analysis plan can be found, if not in the protocol                                                                                                                                                                                                                                     | 9             |
| 25 |                                                  |      |                                                                                                                                                                                                                                                                                                                                                                                                              |               |
| 26 |                                                  |      |                                                                                                                                                                                                                                                                                                                                                                                                              |               |
| 27 |                                                  |      |                                                                                                                                                                                                                                                                                                                                                                                                              |               |
| 28 |                                                  |      |                                                                                                                                                                                                                                                                                                                                                                                                              |               |
| 29 |                                                  |      |                                                                                                                                                                                                                                                                                                                                                                                                              |               |
| 30 | Statistics: additional analyses                  | #20b | Methods for any additional analyses (eg, subgroup and adjusted analyses)                                                                                                                                                                                                                                                                                                                                     | 9             |
| 31 |                                                  |      |                                                                                                                                                                                                                                                                                                                                                                                                              |               |
| 32 |                                                  |      |                                                                                                                                                                                                                                                                                                                                                                                                              |               |
| 33 |                                                  |      |                                                                                                                                                                                                                                                                                                                                                                                                              |               |
| 34 | Statistics: analysis population and missing data | #20c | Definition of analysis population relating to protocol non-adherence (eg, as randomised analysis), and any statistical methods to handle missing data (eg, multiple imputation)                                                                                                                                                                                                                              | 9             |
| 35 |                                                  |      |                                                                                                                                                                                                                                                                                                                                                                                                              |               |
| 36 |                                                  |      |                                                                                                                                                                                                                                                                                                                                                                                                              |               |
| 37 |                                                  |      |                                                                                                                                                                                                                                                                                                                                                                                                              |               |
| 38 |                                                  |      |                                                                                                                                                                                                                                                                                                                                                                                                              |               |
| 39 | Data monitoring: formal committee                | #21a | Composition of data monitoring committee (DMC); summary of its role and reporting structure; statement of whether it is independent from the sponsor and competing interests; and reference to where further details about its charter can be found, if not in the protocol. Alternatively, an explanation of why a DMC is not needed                                                                        | See note<br>8 |
| 40 |                                                  |      |                                                                                                                                                                                                                                                                                                                                                                                                              |               |
| 41 |                                                  |      |                                                                                                                                                                                                                                                                                                                                                                                                              |               |
| 42 |                                                  |      |                                                                                                                                                                                                                                                                                                                                                                                                              |               |
| 43 |                                                  |      |                                                                                                                                                                                                                                                                                                                                                                                                              |               |
| 44 |                                                  |      |                                                                                                                                                                                                                                                                                                                                                                                                              |               |
| 45 |                                                  |      |                                                                                                                                                                                                                                                                                                                                                                                                              |               |
| 46 |                                                  |      |                                                                                                                                                                                                                                                                                                                                                                                                              |               |
| 47 | Data monitoring: interim analysis                | #21b | Description of any interim analyses and stopping guidelines, including who will have access to these interim results and make the final decision to terminate the trial                                                                                                                                                                                                                                      | n/a           |
| 48 |                                                  |      |                                                                                                                                                                                                                                                                                                                                                                                                              |               |
| 49 |                                                  |      |                                                                                                                                                                                                                                                                                                                                                                                                              |               |
| 50 |                                                  |      |                                                                                                                                                                                                                                                                                                                                                                                                              |               |
| 51 |                                                  |      |                                                                                                                                                                                                                                                                                                                                                                                                              |               |
| 52 | Harms                                            | #22  | Plans for collecting, assessing, reporting, and managing solicited and spontaneously reported adverse events and other unintended effects of trial interventions or trial conduct                                                                                                                                                                                                                            | 5             |
| 53 |                                                  |      |                                                                                                                                                                                                                                                                                                                                                                                                              |               |
| 54 |                                                  |      |                                                                                                                                                                                                                                                                                                                                                                                                              |               |
| 55 |                                                  |      |                                                                                                                                                                                                                                                                                                                                                                                                              |               |
| 56 |                                                  |      |                                                                                                                                                                                                                                                                                                                                                                                                              |               |
| 57 |                                                  |      |                                                                                                                                                                                                                                                                                                                                                                                                              |               |
| 58 | Auditing                                         | #23  | Frequency and procedures for auditing trial conduct, if any, and                                                                                                                                                                                                                                                                                                                                             | 10            |
| 59 |                                                  |      |                                                                                                                                                                                                                                                                                                                                                                                                              |               |
| 60 |                                                  |      |                                                                                                                                                                                                                                                                                                                                                                                                              |               |

|    |                                             |                                                                                                                                                                                                                                                                                          |             |
|----|---------------------------------------------|------------------------------------------------------------------------------------------------------------------------------------------------------------------------------------------------------------------------------------------------------------------------------------------|-------------|
|    |                                             | whether the process will be independent from investigators and the sponsor                                                                                                                                                                                                               |             |
| 1  |                                             |                                                                                                                                                                                                                                                                                          |             |
| 2  |                                             |                                                                                                                                                                                                                                                                                          |             |
| 3  |                                             |                                                                                                                                                                                                                                                                                          |             |
| 4  | Research ethics approval                    | #24 Plans for seeking research ethics committee / institutional review board (REC / IRB) approval                                                                                                                                                                                        | See note 9  |
| 5  |                                             |                                                                                                                                                                                                                                                                                          |             |
| 6  |                                             |                                                                                                                                                                                                                                                                                          |             |
| 7  |                                             |                                                                                                                                                                                                                                                                                          |             |
| 8  | Protocol amendments                         | #25 Plans for communicating important protocol modifications (eg, changes to eligibility criteria, outcomes, analyses) to relevant parties (eg, investigators, REC / IRBs, trial participants, trial registries, journals, regulators)                                                   | See note 10 |
| 9  |                                             |                                                                                                                                                                                                                                                                                          |             |
| 10 |                                             |                                                                                                                                                                                                                                                                                          |             |
| 11 |                                             |                                                                                                                                                                                                                                                                                          |             |
| 12 |                                             |                                                                                                                                                                                                                                                                                          |             |
| 13 |                                             |                                                                                                                                                                                                                                                                                          |             |
| 14 | Consent or assent                           | #26a Who will obtain informed consent or assent from potential trial participants or authorised surrogates, and how (see Item 32)                                                                                                                                                        | 4,5,11      |
| 15 |                                             |                                                                                                                                                                                                                                                                                          |             |
| 16 |                                             |                                                                                                                                                                                                                                                                                          |             |
| 17 |                                             |                                                                                                                                                                                                                                                                                          |             |
| 18 | Consent or assent: ancillary studies        | #26b Additional consent provisions for collection and use of participant data and biological specimens in ancillary studies, if applicable                                                                                                                                               | n/a         |
| 19 |                                             |                                                                                                                                                                                                                                                                                          |             |
| 20 |                                             |                                                                                                                                                                                                                                                                                          |             |
| 21 |                                             |                                                                                                                                                                                                                                                                                          |             |
| 22 | Confidentiality                             | #27 How personal information about potential and enrolled participants will be collected, shared, and maintained in order to protect confidentiality before, during, and after the trial                                                                                                 | 9           |
| 23 |                                             |                                                                                                                                                                                                                                                                                          |             |
| 24 |                                             |                                                                                                                                                                                                                                                                                          |             |
| 25 |                                             |                                                                                                                                                                                                                                                                                          |             |
| 26 |                                             |                                                                                                                                                                                                                                                                                          |             |
| 27 | Declaration of interests                    | #28 Financial and other competing interests for principal investigators for the overall trial and each study site                                                                                                                                                                        | 11          |
| 28 |                                             |                                                                                                                                                                                                                                                                                          |             |
| 29 |                                             |                                                                                                                                                                                                                                                                                          |             |
| 30 |                                             |                                                                                                                                                                                                                                                                                          |             |
| 31 | Data access                                 | #29 Statement of who will have access to the final trial dataset, and disclosure of contractual agreements that limit such access for investigators                                                                                                                                      | See note 11 |
| 32 |                                             |                                                                                                                                                                                                                                                                                          |             |
| 33 |                                             |                                                                                                                                                                                                                                                                                          |             |
| 34 |                                             |                                                                                                                                                                                                                                                                                          |             |
| 35 |                                             |                                                                                                                                                                                                                                                                                          |             |
| 36 | Ancillary and post trial care               | #30 Provisions, if any, for ancillary and post-trial care, and for compensation to those who suffer harm from trial participation                                                                                                                                                        | n/a (none)  |
| 37 |                                             |                                                                                                                                                                                                                                                                                          |             |
| 38 |                                             |                                                                                                                                                                                                                                                                                          |             |
| 39 |                                             |                                                                                                                                                                                                                                                                                          |             |
| 40 | Dissemination policy: trial results         | #31a Plans for investigators and sponsor to communicate trial results to participants, healthcare professionals, the public, and other relevant groups (eg, via publication, reporting in results databases, or other data sharing arrangements), including any publication restrictions | 10          |
| 41 |                                             |                                                                                                                                                                                                                                                                                          |             |
| 42 |                                             |                                                                                                                                                                                                                                                                                          |             |
| 43 |                                             |                                                                                                                                                                                                                                                                                          |             |
| 44 |                                             |                                                                                                                                                                                                                                                                                          |             |
| 45 |                                             |                                                                                                                                                                                                                                                                                          |             |
| 46 |                                             |                                                                                                                                                                                                                                                                                          |             |
| 47 | Dissemination policy: authorship            | #31b Authorship eligibility guidelines and any intended use of professional writers                                                                                                                                                                                                      | See note 12 |
| 48 |                                             |                                                                                                                                                                                                                                                                                          |             |
| 49 |                                             |                                                                                                                                                                                                                                                                                          |             |
| 50 |                                             |                                                                                                                                                                                                                                                                                          |             |
| 51 | Dissemination policy: reproducible research | #31c Plans, if any, for granting public access to the full protocol, participant-level dataset, and statistical code                                                                                                                                                                     | 10          |
| 52 |                                             |                                                                                                                                                                                                                                                                                          |             |
| 53 |                                             |                                                                                                                                                                                                                                                                                          |             |
| 54 |                                             |                                                                                                                                                                                                                                                                                          |             |
| 55 | Informed consent materials                  | #32 Model consent form and other related documentation given to participants and authorised surrogates                                                                                                                                                                                   | See note 13 |
| 56 |                                             |                                                                                                                                                                                                                                                                                          |             |
| 57 |                                             |                                                                                                                                                                                                                                                                                          |             |
| 58 |                                             |                                                                                                                                                                                                                                                                                          |             |
| 59 |                                             |                                                                                                                                                                                                                                                                                          |             |
| 60 |                                             |                                                                                                                                                                                                                                                                                          |             |

1 Biological specimens #33 Plans for collection, laboratory evaluation, and storage of biological n/a  
2 specimens for genetic or molecular analysis in the current trial and  
3 for future use in ancillary studies, if applicable  
4  
5  
6

## 7 Author notes

- 9 1. n/a (not used)
- 11 2. 1 (The corresponding author is Sponsor-Investigator)
- 13 3. 1,11 (see above)
- 15 4. n/a (short, low risk trial)
- 17 5. n/a (no specific criteria)
- 19 6. n/a (no strategies)
- 21 7. n/a (no plans)
- 23 8. n/a (short, low risk study)
- 25 9. 2 (already approved)
- 27 10. n/a (no further modifications are expected)
- 29 11. 10 (public access)
- 31 12. n/a (standard guideline (Vancouver), no professional writers)
- 33 13. n/a (attached in seperate file)

35 The SPIRIT checklist is distributed under the terms of the Creative Commons Attribution License CC-BY-ND  
37 3.0. This checklist was completed on 11. January 2019 using <https://www.goodreports.org/>, a tool made by the  
39 [EQUATOR Network](#) in collaboration with [Penelope.ai](#)  
41  
42  
43  
44  
45  
46  
47  
48  
49  
50  
51  
52  
53  
54  
55  
56  
57  
58  
59

# BMJ Open

## Design of a randomized controlled trial of the effects of empagliflozin on myocardial perfusion, function and metabolism in type 2 diabetes patients at high cardiovascular risk (The SIMPLE trial)

|                                 |                                                                                                                                                                                                                                                                                                                                                                                                                                                                                                                                                                                                                                                                                                                                                                                                                                                                                                                                                                                                                                                                                       |
|---------------------------------|---------------------------------------------------------------------------------------------------------------------------------------------------------------------------------------------------------------------------------------------------------------------------------------------------------------------------------------------------------------------------------------------------------------------------------------------------------------------------------------------------------------------------------------------------------------------------------------------------------------------------------------------------------------------------------------------------------------------------------------------------------------------------------------------------------------------------------------------------------------------------------------------------------------------------------------------------------------------------------------------------------------------------------------------------------------------------------------|
| Journal:                        | <i>BMJ Open</i>                                                                                                                                                                                                                                                                                                                                                                                                                                                                                                                                                                                                                                                                                                                                                                                                                                                                                                                                                                                                                                                                       |
| Manuscript ID                   | bmjopen-2019-029098.R1                                                                                                                                                                                                                                                                                                                                                                                                                                                                                                                                                                                                                                                                                                                                                                                                                                                                                                                                                                                                                                                                |
| Article Type:                   | Protocol                                                                                                                                                                                                                                                                                                                                                                                                                                                                                                                                                                                                                                                                                                                                                                                                                                                                                                                                                                                                                                                                              |
| Date Submitted by the Author:   | 05-Jul-2019                                                                                                                                                                                                                                                                                                                                                                                                                                                                                                                                                                                                                                                                                                                                                                                                                                                                                                                                                                                                                                                                           |
| Complete List of Authors:       | Jürgens, Mikkel; Herlev Hospital, Schou, Morten; Herlev Hospital, Cardiology<br>Hasbak, Philip; Copenhagen University Hospital, Rigshospitalet, Clinical Physiology, Nuclear Medicine & PET 4011, Cluster of Molecular Imaging<br>kjær, andreas; Copenhagen University Hospital, Rigshospitalet, Clinical Physiology, Nuclear Medicine & PET 4011, Cluster of Molecular Imaging<br>Wolsk, Emil; Rigshospitalet, Department of Cardiology - The Heart Centre<br>Zerahn, Bo; Herlev and Gentofte Hospital, University of Copenhagen, Department of Clinical Physiology and Nuclear Medicine<br>Wiberg, Mikkel; Herlev Hospital, Medicine<br>Brandt, Niels; Herlev and Gentofte Hospital, University of Copenhagen, Department of medicine<br>Gæde, Peter; Slagelse Sygehus<br>Rossing, Peter; Steno Diabetes Center AS<br>Faber, J; Herlev Hospital, Medicine<br>Inzucchi, Silvio; Yale School of Medicine, Section of Endocrinology<br>Gustafsson, Finn; Rigshospitalet, Department of Cardiology - The Heart Centre<br>Kistorp, Caroline; Rigshospitalet, Department of Endocrinology |
| <b>Primary Subject Heading</b>: | Diabetes and endocrinology                                                                                                                                                                                                                                                                                                                                                                                                                                                                                                                                                                                                                                                                                                                                                                                                                                                                                                                                                                                                                                                            |
| Secondary Subject Heading:      | Cardiovascular medicine                                                                                                                                                                                                                                                                                                                                                                                                                                                                                                                                                                                                                                                                                                                                                                                                                                                                                                                                                                                                                                                               |
| Keywords:                       | Diabetic nephropathy & vascular disease < DIABETES & ENDOCRINOLOGY, RADIOLOGY, CARDIOLOGY, Cardiovascular imaging < RADIOLOGY & IMAGING                                                                                                                                                                                                                                                                                                                                                                                                                                                                                                                                                                                                                                                                                                                                                                                                                                                                                                                                               |
|                                 |                                                                                                                                                                                                                                                                                                                                                                                                                                                                                                                                                                                                                                                                                                                                                                                                                                                                                                                                                                                                                                                                                       |

SCHOLARONE™  
Manuscripts



# Design of a randomized controlled trial of the effects of empagliflozin on myocardial perfusion, function and metabolism in type 2 diabetes patients at high cardiovascular risk (The SIMPLE trial)

Mikkel Jürgens<sup>1</sup>, Morten Schou<sup>2,3</sup>, Philip Hasbak<sup>4</sup>, Andreas Kjær<sup>4</sup>, Emil Wolsk<sup>5</sup>, Bo Zerahn<sup>6</sup>,  
Mikkel Wiberg<sup>1</sup>, Niels Brandt<sup>7</sup>, Peter Gæde<sup>8</sup>, Peter Rossing<sup>3,9</sup>, Jens Faber<sup>1,3</sup>, Silvio E.  
Inzucchi<sup>10</sup>, Finn Gustafsson<sup>4,9</sup>, Caroline Kistorp<sup>3,7</sup>

## Author e-mail addresses:

Mikkel Jürgens: [mikkel.juergens.01@regionh.dk](mailto:mikkel.juergens.01@regionh.dk); Morten Schou: [morten.schou.04@regionh.dk](mailto:morten.schou.04@regionh.dk); Philip Hasbak: [Philip.Hasbak@regionh.dk](mailto:Philip.Hasbak@regionh.dk); Andreas Kjær: [Andreas.Kjaer@regionh.dk](mailto:Andreas.Kjaer@regionh.dk); Emil Wolsk: [emil.wolsk@regionh.dk](mailto:emil.wolsk@regionh.dk); Bo Zerahn: [Bo.Zerahn@regionh.dk](mailto:Bo.Zerahn@regionh.dk); Mikkel Wiberg: [Mikkel\\_Wiberg@hotmail.com](mailto:Mikkel_Wiberg@hotmail.com); Niels Brandt: [niels.hoeg.brandt-jacobsen@regionh.dk](mailto:niels.hoeg.brandt-jacobsen@regionh.dk); Peter Gæde: [peter.haulund.gaede@regionh.dk](mailto:peter.haulund.gaede@regionh.dk); Peter Rossing: [peter.rossing@regionh.dk](mailto:peter.rossing@regionh.dk); Jens Faber: [Jens.Faber@regionh.dk](mailto:Jens.Faber@regionh.dk); Silvio E. Inzucchi: [silvio.inzucchi@yale.edu](mailto:silvio.inzucchi@yale.edu); Finn Gustafsson: [Finn.Gustafsson@regionh.dk](mailto:Finn.Gustafsson@regionh.dk); Caroline Kistorp: [caroline.michaela.kistorp@regionh.dk](mailto:caroline.michaela.kistorp@regionh.dk)

**Word count: 3147**

**Mesh terms: Diabetes Mellitus, Type 2; Sodium-Glucose Transporter 2 Inhibitors, Cardiovascular Diseases, Myocardial Perfusion Imaging, Cardiac Catheterization**

**Correspondence to: Caroline Kistorp, Medicinsk Endokrinologisk Klinik, Rigshospitalet, Blegdamsvej 9, 2100 Copenhagen; +45 3545 9642; [caroline.michaela.kistorp@regionh.dk](mailto:caroline.michaela.kistorp@regionh.dk)**

## ABSTRACT

**Introduction:** A diagnosis of type 2 diabetes (T2D) more than doubles the risk of cardiovascular disease (CVD), with heart failure (HF) being one of the most common complications with a severe prognosis. The landmark EMPA-REG study demonstrated that treatment with the sodium glucose cotransporter-2 (SGLT-

2) inhibitor empagliflozin rapidly and significantly reduces CVD mortality and admission rates for HF. However, the mechanisms behind this reduction in clinical events are unknown.

The current study was designed to investigate the effects of the SGLT-2 inhibitor empagliflozin on myocardial perfusion and function in patients with T2D and high CVD risk.

**Methods and analysis:** In this investigator-initiated, randomized, double-blind controlled clinical trial, 92 patients with T2D and established CVD or high CVD risk, will be randomized to treatment with empagliflozin 25 mg or a matching placebo for 13 weeks. The primary outcome measure is change in myocardial flow reserve measured quantitatively by Rubidium-82 position emission tomography ( $^{82}\text{Rb}$ -PET). In a substudy, invasive hemodynamics at rest and during exercise will be measured at baseline and following the intervention, using right heart catheterization.

**Ethics and dissemination:** The study protocol (v7, 02/08/2018) has been approved by the Ethics Committee of the Capital Region, Danish Data Protection Board and the Danish Medicines Agency, and it will be monitored according to the Good Clinical Practice (GCP) regulations from the International Conference on Harmonization. The results be submitted to international peer-reviewed journals and be presented at conferences. The data will be made available to the public via EudraCT and [www.clinicaltrials.gov](http://www.clinicaltrials.gov).

**Trial Registration:** ClinicalTrials.gov Identifier: NCT03151343, EudraCT number: 2016-003743-10

## ARTICLE SUMMARY

### Strengths and limitations of this study:

- Double-blinded, randomized and placebo controlled.
- The use of advanced imaging techniques.
- Single-center
- No hard endpoints, all outcomes are based on surrogates

## INTRODUCTION

Type 2 diabetes (T2D) is a significant risk factor for cardiovascular disease (CVD), including heart failure (HF), and improved glycaemic control is only modestly beneficial in reducing macrovascular disease.<sup>1</sup>

In 2008, prompted by concerns that the T2D drug rosiglitazone might increase the risk of myocardial infarction, the U.S. Food & Drug Administration published guidelines effectively mandating large cardiovascular outcome

1  
2  
3  
4 trials for new T2D drugs. Several such trials have been completed or are ongoing. The trials have primarily  
5 examined the safety of dipeptidyl peptidase 4 (DPP-IV) inhibitors, glucagon-like peptide-1 receptor agonists  
6 (GLP-1 RA) and sodium–glucose cotransporter 2 (SGLT2) inhibitors.<sup>2–8</sup> The DPP-IV inhibitor trial SAVOR-TIMI  
7 indicated an increase in the secondary endpoint, hospitalization due to HF with the active comparator, while  
8 another DPP-IV trial, TECOS, as well as the newly published CARMELINA did not demonstrate an increased risk  
9 with the active drug. The GLP-1 RA trials LEADER and SUSTAIN although with a reduction in the primary MACE  
10 endpoint were neutral with regards to risk of HF. Most of the SGLT-2 trials have demonstrated CV benefits<sup>9</sup> via  
11 a reduction of the primary endpoint MACE. In the EMPA-REG outcome study, the SGLT-2 inhibitor empagliflozin  
12 reduced the risk of CV death by 38% and in contrast to the GLP-1 RA trials, admission due to HF by 35% in a  
13 high-risk T2D population.<sup>6,10</sup>

14  
15  
16  
17  
18  
19  
20  
21 The novel evidence from the SGLT-2 inhibitor trials was surprising, because the treatments only had a modest  
22 effect on classical CV risk factors. Indeed, the mechanism behind their profound effect on CV death and risk of  
23 HF remains unknown, although several hypotheses have been proposed. An effect reducing the atherosclerotic  
24 burden is considered unlikely, because the risk of CV events was reduced within weeks of treatment<sup>11</sup>. Thus,  
25 the cardioprotective effect might be functional rather than anatomical. Impaired myocardial microcirculation is  
26 considered to play a significant role in T2D-related CVD<sup>12</sup> as well as in HF with preserved ejection fraction.<sup>13</sup>  
27 Furthermore, coronary vascular dysfunction, particularly decreased vasodilator capacity, is a significant  
28 predictor for CV death in patients with T2D.<sup>14,15</sup> Notably, T2D patients with preserved coronary vasodilation  
29 had the same low risk of CVD as subjects without diabetes<sup>14</sup>. Experimental studies have shown that SGLT-2  
30 inhibitor treatment significantly ameliorates coronary arterial and aortic (media) thickening, pericoronary  
31 arterial fibrosis and improves vasodilatation in diabetic rodents.<sup>16,17</sup> Thus, part of the underlying effect of  
32 empagliflozin in EMPA-REG could be driven by improvement in myocardial microcirculation.

33  
34  
35  
36  
37  
38  
39  
40  
41 A complementary hypothesis has been suggested to explain the early beneficial effects on HF  
42 hospitalization found in the EMPA-REG trial.<sup>18</sup> Inhibition of SGLT-2 is associated with increased diuresis, thus  
43 the sodium- and volume-reducing effect could favour cardiac loading conditions in patients with T2D with  
44 subclinical dysfunctions of the heart. The proposed effects on central hemodynamics, especially right and left  
45 heart filling pressures and cardiac output, can be measured directly by right heart catheterization. Pulmonary  
46 capillary wedge pressure (PCWP), a measure of left heart filling pressure, has previously been shown to be  
47 associated with functional capacity among patients with HF.<sup>19</sup> Therefore, investigating the effect of SGLT-2  
48 inhibitor on central hemodynamics during rest and exercise may contribute vital knowledge on the  
49  
50  
51  
52  
53  
54  
55  
56  
57  
58  
59  
60

1  
2  
3  
4 mechanisms behind the markedly reduced risk of admission for HF demonstrated in EMPA-REG and DECLAIRES  
5  
6 TIMI <sup>6,8</sup>.

7  
8 The pathogenesis of myocardial dysfunction in T2D has been linked with insulin resistance (IR)  
9  
10 and adipose tissue dysfunction, with an increased supply of free fatty acids (FFA) and adipocytokines mediating  
11  
12 ectopic fat storage and thus increased intra-myocardial lipid accumulation, with decremental impact on cardiac  
13  
14 function.<sup>20</sup> Increased glycosuria with SGLT-2 inhibitors could improve IR by indirectly increasing peripheral  
15  
16 glucose uptake<sup>21</sup> through a reduction in glucose toxicity. Moreover they induce a small increase in plasma  
17  
18 ketone bodies, which may serve as a preferred fuel source for the myocardium.<sup>22</sup> Markers of inflammation  
19  
20 have been associated with the risk of vascular events, independently of traditional risk factors and an effect on  
21  
22 inflammation status should also be considered<sup>23</sup>. Therefore, further knowledge on the effects of SGLT-2  
23  
24 inhibitors on metabolic parameters, such as biomarkers of inflammation, adipose tissue function and the  
25  
26 relationship with parameters on cardiac function in patients with T2D is warranted.

27  
28 In summary, SGLT2 inhibitors have been shown to reduce CVD in high-risk T2D patients, with several  
29  
30 explanatory hypotheses being suggested that remain to be tested in clinical trials.

### 31 Hypothesis

32 Treatment with empagliflozin for 13 weeks improves the myocardial flow reserve (MFR) in patients with T2D  
33  
34 and high cardiovascular risk. The duration of 13 weeks was chosen, as the EMPA-REG study showed a clear  
35  
36 effect on the primary outcomes at this timepoint.

### 37 Objectives

38 The primary objective of the current trial is to evaluate the effect of empagliflozin on MFR as measured by  
39  
40 <sup>82</sup>Rb-PET compared to placebo in patients with T2D and CVD or additional CV risk factors. In a sub study, the  
41  
42 effect of empagliflozin on key hemodynamic parameters will be measured during right heart catheterization at  
43  
44 rest and during exercise. Key secondary outcomes include changes in cardiac echocardiographic evaluations of  
45  
46 systolic and diastolic functions, functional capacity by accelerometry, and changes in glucose metabolism,  
47  
48 plasma ketone bodies and adipose tissue function.

## METHODS AND ANALYSIS

### Trial design

This is an investigator-initiated, randomized, placebo-controlled, double-blind trial. Participants will be recruited from the T2D and cardiology outpatient clinics at Herlev-Gentofte University Hospital, Steno Diabetes Center Copenhagen and Rigshospitalet, Denmark.

### Study population

The study will include 92 patients with T2D who have either additional CV risk factors or pre-existing CVD. Detailed inclusion and exclusion criteria are listed in Table 1. Eligible patients will be invited for screening, and patients who meet all the criteria will be randomized to the double-blinded treatment. Participants will be considered part of the intention to treat (ITT) group after receiving the first dose of the study medication”

### Trial Intervention

Participants will be randomized 1:1 to either empagliflozin 25 mg or matching placebo once daily for 13 weeks. A dose of 25 mg rather than 10 mg was chosen, as previous studies have indicated a dose-response effect on metabolic outcomes<sup>24</sup>. The trial medication will be randomized in computer-generated 1:1 blocks of 10 by the study pharmacy (Glostrup Pharmacy, Copenhagen, Denmark). Participants will receive randomization numbers and the corresponding medication containers sequentially. In case of medical emergency, participants can be unblinded individually. The study medicine will be suspended if the participant becomes pregnant or withdraws consent. The investigators may suspend the medication for safety reasons.

### Patient and public involvement

The study was designed without involvement from patients or the public. The patients will be offered access to the results of the study, when these become available.

### Trial visits and procedures

#### Visits

A schematic overview of the trial visits is presented in Table 2 and as a flowchart in Figure 1. At the screening visit ( $V_0$ ), informed consent will be obtained, and patients will be assessed for eligibility based on medical

1  
2  
3  
4 history, including diabetes duration and comorbidities, physical examinations and blood samples. Ineligible  
5 participants will be counted as screen failures, and the reason for screen failure will be recorded.

6  
7 Outcome-related procedures are performed at the baseline ( $V_1$ ) and after 13 weeks of treatment ( $V_3$ ). The trial  
8 medication will be dispensed when all the procedures pertaining to  $V_1$  have been completed.

9  
10 After 3 to 6 weeks of treatment, the participants will visit the trial site for blood tests and a physical  
11 examination ( $V_2$ ). Participant status and compliance as well as adverse events will be assessed at  $V_2$ ,  $V_3$  and  
12 during two phone calls ( $T_1$  and  $T_2$ ).  
13  
14  
15

### 16 17 **$^{82}\text{Rb}$ -PET**

18  
19 Myocardial perfusion and myocardial flow reserve (MFR) will be measured using cardiac  $^{82}\text{Rb}$ -PET, which allows  
20 for flow quantification in absolute terms. To determine the MFR, measurements will be performed at rest and  
21 during adenosine-induced stress. A standard clinical protocol will be used. Participants will be scanned in the  
22 supine position using a Siemens Biograph mCT/PET 128-slice scanner (Siemens Medical Solutions, Knoxville,  
23 USA). Low-dose non-contrast CT will be acquired for attenuation correction as well as measurement of cardiac  
24 adipose tissue volume. Approximately 1100 MBq of  $^{82}\text{Rb}$  will be obtained from a CardioGen-82 Sr-82/Rb-82  
25 generator (Bracco Diagnostics, Inc., Princeton, New Jersey, USA) and intravenously infused with a constant  
26 flowrate of 50 mL/min. List-mode 3D data acquisition will begin with the tracer infusion and continue for 7  
27 minutes. Static and ECG-gated images will be reconstructed with a 2.5-minute delay to allow  $^{82}\text{Rb}$  to clear from  
28 the blood pool. Maximal hyperaemia will be induced with adenosine infused at 140  $\mu\text{g}/\text{kg}/\text{min}$  for 6 minutes.  
29 After 2.5 minutes of adenosine infusion, intravenous  $^{82}\text{Rb}$  infusion and list-mode acquisition will follow the  
30 same protocol as for rest. Myocardial blood perfusion quantification (in mL/min/g) will be performed using  
31 Cedars-Sinai QGS+QPS 2015.6 software (Cedars-Sinai Medical Center), which is based on a single-compartment  
32 model for Rb-82 tracer kinetics.  
33  
34  
35  
36  
37  
38  
39  
40  
41  
42  
43  
44  
45

### 46 **Hemodynamics sub-study**

47  
48 In a substudy, 38 participants randomly selected from the primary study population will perform a graded  
49 exercise test until maximal exertion using a supine ergometer with simultaneous invasive hemodynamic  
50 measurements. Using local anaesthesia, A Swan-Ganz catheter will be placed into the pulmonary artery  
51 via the right internal jugular vein. The following hemodynamic variables will be assessed: pulmonary  
52 capillary wedge pressure (PCWP), cardiac output (CO) using thermodilution, central venous pressure (CVP)  
53  
54  
55  
56  
57  
58  
59  
60

1  
2  
3  
4 and pulmonary artery pressure (PAP). Following measurements at rest, participants will be transferred to  
5 a supine bicycle ergometer, and the measurements will be repeated (leg-raise situation). The participant  
6 will be instructed to pedal at 60 rpm and the workload is incrementally increased at steps of 10watts.  
7  
8 Measurements during exercise will be obtained at 25 watts and during peak exercise. Blood sampled from  
9 the pulmonary vein will be obtained at rest, 25 watts and at peak exercise for analyses of lactate, oxygen  
10 saturation and other blood gas variables.  
11  
12  
13  
14  
15

### 16 **Echocardiography**

17  
18 The following echocardiographic measurements will be obtained using 3D and 2D imaging: left ventricular  
19 ejection fraction (LVEF), left ventricle (LV) end-diastolic and end-systolic diameter, LV mass and left atrial  
20 volume. From pulsed-wave Doppler mitral inflow curves, E-wave, A-wave, E-decT and isovolumetric  
21 relaxation time will be recorded. Tissue Doppler imaging will be obtained in the apical four-chamber, two-  
22 chamber and apical long-axis to evaluate peak systolic (s'), early diastolic (e') and late diastolic (a')  
23 velocities during the ejection period. Strain measures of LV (radial, circumferential and longitudinal  
24 speckle tracking) will be assessed via 2D echocardiography. The longitudinal tissue velocity of the LV will  
25 be assessed by averaging myocardial velocities and displacement of the mitral annular position in the  
26 septal, lateral, inferior, posterior and anterior wall of the LV. Diastolic function will be assessed  
27 according to EAE/ASE recommendations.  
28  
29  
30  
31  
32  
33  
34  
35  
36  
37

### 38 **Cr-51 EDTA**

39 The Cr-51 EDTA method will be used to measure glomerular filtration rate (GFR). A single intravenous  
40 administration of 3.7MBq of Cr-51 EDTA is given. A venous sample is drawn four hours after  
41 administration.  
42  
43  
44  
45

### 46 **Accelerometry**

47 A patient-worn accelerometer will be used to assess daily activity level. The patient will wear the  
48 accelerometer continuously for 7 days, except for bathing and swimming.  
49  
50  
51

### 52 **Ambulatory blood pressure**

1  
2  
3  
4 24-hour ambulatory blood pressures will be obtained using a Mobil-O-Graph New Generation 24h ABPM  
5 Classic (Siemens, Germany) set to measure blood pressure every 20 minutes during the daytime and every  
6 hour during the night.  
7  
8  
9

### 10 11 **Adipose tissue biopsy**

12 Biopsies will be obtained from the abdominal subcutaneous tissue lateral to the umbilicus during a fasting  
13 state using the Bergstrom needle technique. Following dissection, the biopsies are washed and snap  
14 frozen in liquid nitrogen and stored at -80°C. Total mRNA will be extracted from adipose tissue with  
15 commercially available lipid tissue kits to measure the mRNA expression of biomarkers of interest. Protein  
16 expression will be analysed using Western blots. Quantification of inflammatory cells will be performed  
17 according to validated histological procedures. Fibrosis levels will be measured using the Sirius Red stain.  
18  
19  
20  
21  
22  
23  
24

### 25 **Oral Glucose Tolerance Test (OGTT)**

26 The fasting participant will drink a solution of 75g of glucose. Blood will be drawn at time points 0, 30, 60  
27 and 120 minutes, and measurements of plasma glucose, C-peptide and plasma insulin will be taken.  
28  
29  
30

### 31 **Questionnaires**

32 Participants will complete the EQ-5D-5L and the Minnesota Living with Heart Failure questionnaires.  
33  
34  
35  
36

### 37 **Heart rate variability (HRV)**

38 Heart rate variability will be measured using the Vagus™ handheld device. Heart rate response will be  
39 measured at rest, while rising from a lying position to standing upright, during deep in- and expiration and  
40 while performing the Valsalva manoeuvre.  
41  
42  
43  
44  
45

### 46 **Pulse wave analysis (PWA)**

47 Arterial stiffness will be measured using PWA. The procedure will be performed using a SphygmoCor  
48 device (version 7.0, Atcor Medical, Sydney, Australia) at the right radial artery.  
49  
50  
51

### 52 **Body composition**

53  
54  
55  
56  
57  
58  
59  
60



1  
2  
3  
4 Body composition will be measured by Dual-energy X-ray absorptiometry (DXA) (Hologic Discovery DXA  
5 scanner, Hologic Inc., Bedford, USA) based on fat free, fat and bone mass. Supplementary software  
6 provides a novel method for differentiating between visceral and subcutaneous abdominal fat.  
7  
8  
9

### 10 11 **Urine and blood samples, fasting**

12  
13 Blood will be drawn in the fasting state, and patients will provide a sample of first morning urine. Standard  
14 blood analyses will be performed immediately after sampling. Urine samples for measurement of  
15 albumin/creatinine ratio and blood samples for specialized biomarkers will be stored at -80°C until batch  
16 analysis can be performed. Blood analysis will include inflammatory biomarkers such as interleukin-6 (IL-  
17 6) and tumor necrosis factor- $\alpha$  (TNF- $\alpha$ ), cardiospecific biomarkers such as N-terminal pro-B-type  
18 natriuretic peptide (NT-proBNP) and high-sensitivity troponin T (hs-TNT), as well as markers of adipocyte  
19 function, including adiponectin and leptin.  
20  
21  
22  
23  
24

## 25 **ENDPOINTS**

### 26 27 **Primary outcome measurement**

28  
29 The effect of empagliflozin 25 mg once daily for 13 weeks, compared with placebo on the myocardial flow  
30 reserve MFR assessed by  $^{82}\text{Rb}$ -PET  
31

### 32 **Key sub-study measurement**

33  
34 The effect of empagliflozin compared with placebo on PCWP at a workload of 25 watts  
35  
36

### 37 **Secondary outcome measurements**

38  
39 The effect of empagliflozin compared with placebo on the following:

- 40 - Global left and right heart function
- 41 - Renal function by Cr51-EDTA plasma clearance
- 42 - Cardiac adipose tissue volume
- 43 - PCWP at peak exercise, corrected to body weight
- 44 - Plasma levels of NT-proBNP, MR-proANP, MR-proADM, GAL-3, hsTNT, GDF-15, PIGF, sFlt-1, FFA,  
45 adiponectin, leptin, TNF- $\alpha$ , IL-6, MCP-1, MAC-1, COLL-A1 and FGF-21.
- 46 - Daily activity levels
- 47 - Body fat distribution and visceral vs. subcutaneous abdominal fat using DXA
- 48 - Ambulatory systolic and diastolic blood pressures
- 49
- 50
- 51
- 52
- 53
- 54
- 55
- 56
- 57
- 58
- 59
- 60

- Quality of life assessed by the Minnesota Living with Heart Failure and the EuroQol EQ-5D-5L questionnaires
- Plasma beta-hydroxy butyrate levels
- Urine albumin/creatinine ratio
- Adipose tissue fibrosis, mRNA and protein expression of TNF- $\alpha$ , adiponectin, IL-6, COL1-A1, MAC-1, FGF-21, and monocyte chemoattractant protein 1 (MCP1)

## STATISTICAL ANALYSIS

### SAMPLE SIZE

Primary endpoint The  
primary endpoint is change in MFR. In a previous study on a comparable population, the SD of measurements of MFR by  $^{82}\text{Rb}$  PET was 0.8. Assuming a clinically relevant difference between the treatment and placebo groups after 6 months of 0.5 in MFR,<sup>25</sup> a sample size of 41:41 (empagliflozin: placebo) can be detected with 80% power and a two-sided significance level of 5%. In all, 92 patients will be randomized to allow for a 10% drop-out rate from the intention-to-treat (ITT) population.

### Sub-study key endpoint

Based on recent experiments in a comparable study population,<sup>26</sup> a difference of 5 mmHg in PCWP during exercise was considered clinically significant. The SD of measurements of PCWP was 5 mmHg; thus, a sample size of 16:16 is required with a power of 80% and a two-sided significance level of 5% to detect a difference of 5 mmHg between groups. In total 38 patients will be included in the sub-study to allow for a 15% drop-out rate.

In the ITT population, none of the randomized participants will be excluded, and the patients will be analysed according to the randomization group. The per-protocol population will consist of all the patients who completed the study with a documented valid baseline and a final-week assessment of the primary objective without any major protocol violations. Analysis of the primary outcome parameter will focus on a change in global MBF from the baseline to week 13 between the treatment and control groups. The primary analysis will be based on the ITT population. The primary outcome measure will be analysed using ANCOVA with treatment as a factor and the baseline value as a covariate. The model will include the prespecified covariates age and gender. Missing data will be estimated using the maximum likelihood method. Normally distributed variables will be presented as mean  $\pm$ SD, and non-parametric statistics or appropriate log transformation will be

1  
2  
3  
4 performed if an assumption of normality is not met. After log transformation, the variable will be further tested  
5 for normality distribution as indicated. A two-tailed  $p$  value of less than 0.05 will be considered statistically  
6 significant.  
7

8  
9 Comparisons between the treatment groups will be performed by an unpaired two sample  $t$ -test, Mann-  
10 Whitney test or  $\chi^2$  - test as appropriate.  
11

## 12 13 Data management

14 Source data will be recorded in the patient record or in case report forms (CRF). The requirements for entering  
15 source data directly into the CRF are that the data are obtained directly from the patient either by clinical  
16 assessment, interview or point-of-care systems with no printout function and that no more reliable forms of  
17 data capture are available. Medical history, height and weight are examples of such data.  
18

19 A CRF will be constructed for data capture. Data will be stored in coded form for 5 years according to  
20 recommendations from the Danish Data Protection Agency; thereafter, data will be transferred to the Danish  
21 Data Archives.  
22  
23  
24  
25  
26  
27  
28  
29

## 30 Study medication

31 *Name:* Jardiance® (empagliflozin) or a visually identical matching placebo

32  
33 *Pharmaceutical Form:* Tablet for oral use

34  
35 *Pharmacological Dosage:* Jardiance® or a placebo will be introduced at a dose of 25 mg/day.

36 Intake of the tablet can be done at any time during the day; however, it is recommended that the time of  
37 intake be consistent from day to day.  
38

39  
40 *Side effects:* Very common side effects (> 10%): Hypoglycaemia (when taken in conjunction with insulin or  
41 sulfonylureas); Common side effects (1–10%): Skin itching, balanitis, frequent urination, vaginal candidiasis,  
42 vulvovaginitis  
43

44  
45 *Shipping and packing:* All trial products will be delivered, packed and labelled by Glostrup Pharmacy.

46  
47 *Randomization:* Electronic randomization in blocks of 10 will be provided by Glostrup Pharmacy. The  
48 randomization list will be stored in a locked cabinet. The patients will be assigned consecutive randomization  
49 numbers. Prior to randomization, the patients will be identified by patient numbers which will be assigned  
50 consecutively, and patients will retain these numbers following randomization.  
51  
52  
53  
54  
55  
56  
57  
58  
59  
60

## Concomitant medication

Treatment with herbal medicines is not allowed, but otherwise, there are no restrictions on concomitant medication apart from SGLT2-inhibitors. Before enrolment, participants will confirm that they are receiving optimal T2D therapy, and during the trial, T2D and CV risk or disease will be managed according to the best available evidence.

## ETHICS AND DISSEMINATION

The study, which will be conducted in accordance with the latest revision of the Helsinki Declaration, EU directive on GCP and ICH-GCP guidelines, has been approved by the Regional Scientific Ethics Committee, the Danish Medicines Agency and the Danish Data Protection Agency. The study is registered at [clinicaltrials.gov](http://clinicaltrials.gov) and monitored by the GCP unit at Bispebjerg University Hospital. The results of the project will be submitted to international peer-reviewed journals regardless of their outcome, and the data will be made available to the public via EudraCT and [www.clinicaltrials.gov](http://www.clinicaltrials.gov). Furthermore, the results will be presented at conferences as abstracts and posters.

### Author affiliations:

<sup>1</sup>Centre of Endocrinology and Metabolism, Department of Internal Medicine, Copenhagen University Hospitals Herlev/Gentofte, Herlev, Denmark.

<sup>2</sup>Department of Cardiology, Copenhagen University Hospitals Herlev/Gentofte, Herlev, Denmark.

<sup>3</sup>Institute of Clinical Medicine, Faculty of Health and Medical Sciences, University of Copenhagen, Copenhagen, Denmark

<sup>4</sup>Department of Clinical Physiology, Nuclear Medicine & PET and Cluster for Molecular Imaging, Department of Biomedical Sciences, Rigshospitalet and University of Copenhagen, Copenhagen, Denmark.

<sup>5</sup>Department of Cardiology, The Heart Centre, Rigshospitalet Copenhagen University Hospital, Copenhagen, Denmark

<sup>6</sup>Department of Clinical Physiology and Nuclear Medicine, Copenhagen University Hospitals Herlev/Gentofte, Herlev, Denmark.

<sup>7</sup>Department of Endocrinology, Rigshospitalet Copenhagen University Hospital, Copenhagen, Denmark.

<sup>8</sup>Slagelse Hospital, Slagelse, Denmark; University of Southern Denmark, Odense, Denmark.

<sup>9</sup>Steno Diabetes Center Copenhagen, Gentofte, Denmark.

<sup>10</sup>Yale Section of Endocrinology, Yale University School of Medicine, New Haven, CT, USA

### Author Contributions:

CK, MS, FG, AK, PH, JF, BZ, SI and MJ conceived the study and participated in its design, planning and coordination. CK, MS, MW, PG, PR, NB and MJ are responsible for the inclusion and examination of patients at Herlev-Gentofte and Rigshospitalet University Hospital. AK and PH are responsible for the <sup>82</sup>Rb-PET measurements and FG, EW for the hemodynamics experiments at Rigshospitalet University Hospital.

**Funding:**

This work is supported by the department of Internal Medicine at Herlev Hospital; the Research council of Herlev Hospital; The Danish Heart Foundation, grant number 16-R107-A6697; The Hartmann Foundation, The Toyota Foundation and by a Steno Collaborative Grant 2018.

ClinicalTrials.gov Identifier: NCT03151343, EudraCT number: 2016-003743-10

**Competing interests:**

PR has received consultancy and/or speaking fees (to his institution) from AbbVie, Astellas, AstraZeneca, Bayer, Boehringer Ingelheim, Bristol-Myers Squibb, Eli Lilly, MSD, Novo Nordisk and Sanofi Aventis and has received institutional research grants from AbbVie, AstraZeneca and Novo Nordisk.

## REFERENCES

1. Turner R. Intensive blood-glucose control with sulphonylureas or insulin compared with conventional treatment and risk of complications in patients with type 2 diabetes (UKPDS 33). *Lancet*. 1998;352(9131):837-853. doi:10.1016/S0140-6736(98)07019-6
2. Scirica BM, Bhatt DL, Braunwald E, et al. Saxagliptin and Cardiovascular Outcomes in Patients with Type 2 Diabetes Mellitus. *N Engl J Med*. 2013;369(14):1317-1326. doi:10.1056/NEJMoa1307684
3. Green JB, Bethel MA, Armstrong PW, et al. Effect of Sitagliptin on Cardiovascular Outcomes in Type 2 Diabetes. *N Engl J Med*. 2015;373(3):232-242. doi:10.1056/NEJMoa1501352
4. Pfeffer MA, Claggett B, Diaz R, et al. Lixisenatide in Patients with Type 2 Diabetes and Acute Coronary Syndrome. *N Engl J Med*. 2015;373(23):2247-2257. doi:10.1056/NEJMoa1509225
5. White WB, Cannon CP, Heller SR, et al. Alogliptin after Acute Coronary Syndrome in Patients with Type 2 Diabetes. *N Engl J Med*. 2013;369(14):1327-1335. doi:10.1056/NEJMoa1305889
6. Zinman B, Wanner C, Lachin JM, et al. Empagliflozin, Cardiovascular Outcomes, and Mortality in Type 2 Diabetes. *N Engl J Med*. 2015;373(22):2117-2128. doi:10.1056/NEJMoa1504720
7. Guthrie R. Canagliflozin and cardiovascular and renal events in type 2 diabetes. *Postgrad Med*. 2018;130(2):149-153. doi:10.1080/00325481.2018.1423852
8. Wiviott SD, Raz I, Bonaca MP, et al. Dapagliflozin and Cardiovascular Outcomes in Type 2 Diabetes. *N Engl J Med*. 2018;NEJMoa1812389. doi:10.1056/NEJMoa1812389
9. Cefalu WT, Kaul S, Gerstein HC, et al. Cardiovascular outcomes trials in type 2 diabetes: Where Do We Go From Here? Ref lections From a Diabetes Care Editors' Expert Forum. *Diabetes Care*. 2018;41(1):14-31. doi:10.2337/dci17-0057
10. Fitchett D, the E-REGO trial investigators, Zinman B, et al. Heart failure outcomes with empagliflozin in patients with type 2 diabetes at high cardiovascular risk: results of the EMPA-REG OUTCOME® trial. *Eur*

- 1  
2  
3  
4  
5  
6  
7  
8  
9  
10  
11  
12  
13  
14  
15  
16  
17  
18  
19  
20  
21  
22  
23  
24  
25  
26  
27  
28  
29  
30  
31  
32  
33  
34  
35  
36  
37  
38  
39  
40  
41  
42  
43  
44  
45  
46  
47  
48  
49  
50  
51  
52  
53  
54  
55  
56  
57  
58  
59  
60
- Heart J.* 2016;37(19):1526-1534. doi:10.1093/eurheartj/ehv728
11. Abdul-Ghani M, Del Prato S, Chilton R, DeFronzo RA. SGLT2 Inhibitors and Cardiovascular Risk: Lessons Learned From the EMPA-REG OUTCOME Study. *Diabetes Care.* 2016;39(5):717-725. doi:10.2337/dc16-0041
  12. Avogaro A, Albiero M, Menegazzo L, De Kreutzenberg S, Fadini GP. Endothelial dysfunction in diabetes: The role of reparatory mechanisms. *Diabetes Care.* 2011;34(SUPPL. 2):285-290. doi:10.2337/dc11-s239
  13. Srivaratharajah K, Coutinho T, Dekemp R, et al. Reduced myocardial flow in heart failure patients with preserved ejection fraction. *Circ Hear Fail.* 2016;9(7). doi:10.1161/CIRCHEARTFAILURE.115.002562
  14. Murthy VL, Naya M, Foster CR, et al. Association between coronary vascular dysfunction and cardiac mortality in patients with and without diabetes mellitus. *Circulation.* 2012;126(15):1858-1868. doi:10.1161/CIRCULATIONAHA.112.120402
  15. Cortigiani L, Rigo F, Gherardi S, et al. Additional Prognostic Value of Coronary Flow Reserve in Diabetic and Nondiabetic Patients With Negative Dipyridamole Stress Echocardiography by Wall Motion Criteria. *J Am Coll Cardiol.* 2007;50(14):1354-1361. doi:10.1016/j.jacc.2007.06.027
  16. Lin B, Koibuchi N, Hasegawa Y, et al. Glycemic control with empagliflozin, a novel selective SGLT2 inhibitor, ameliorates cardiovascular injury and cognitive dysfunction in obese and type 2 diabetic mice. *Cardiovasc Diabetol.* 2014;13(1). doi:10.1186/s12933-014-0148-1
  17. Oelze M, Kröllner-Schön S, Welschof P, et al. The sodium-glucose co-transporter 2 inhibitor empagliflozin improves diabetes-induced vascular dysfunction in the streptozotocin diabetes rat model by interfering with oxidative stress and glucotoxicity. *PLoS One.* 2014;9(11):e112394. doi:10.1371/journal.pone.0112394
  18. Sattar N, McLaren J, Kristensen SL, Preiss D, McMurray JJ. SGLT2 Inhibition and cardiovascular events: why did EMPA-REG Outcomes surprise and what were the likely mechanisms? *Diabetologia.* 2016:1-7. doi:10.1007/s00125-016-3956-x
  19. Emil W, David K, A. BB, et al. Resting and exercise haemodynamics in relation to six-minute walk test in patients with heart failure and preserved ejection fraction. *Eur J Heart Fail.* 2017;20(4):715-722. doi:10.1002/ejhf.976
  20. Sharma S, Adroque J V, Golfman L, et al. Intramyocardial lipid accumulation in the failing human heart resembles the lipotoxic rat heart. *FASEB J.* 2004;18(14):1692-1700. doi:10.1096/fj.04-2263com
  21. Ferrannini E, Muscelli E, Frascerra S, et al. Metabolic response to sodium-glucose cotransporter 2 inhibition in type 2 diabetic patients. *J Clin Invest.* 2014;124(2):499-508. doi:10.1172/JCI72227.uptake
  22. Ferrannini E, Mark M, Mayoux E. CV Protection in the EMPA-REG OUTCOME Trial: A “Thrifty Substrate” Hypothesis. *Diabetes Care.* 2016;(March):dc160330. doi:10.2337/dc16-0330
  23. Ridker PM. Clinician’s Guide to Reducing Inflammation to Reduce Atherothrombotic Risk. *J Am Coll Cardiol.* 2018;72(25):3320-3331. doi:10.1016/j.jacc.2018.06.082

- 1  
2  
3  
4 24. Heise T, Seewaldt-Becker E, Macha S, et al. Safety, tolerability, pharmacokinetics and  
5 pharmacodynamics following 4 weeks' treatment with empagliflozin once daily in patients with type 2  
6 diabetes. *Diabetes, Obes Metab*. 2013;15(7):613-621. doi:10.1111/dom.12073  
7  
8  
9 25. von Scholten BJ, Hasbak P, Christensen TE, et al. Cardiac 82Rb PET/CT for fast and non-invasive  
10 assessment of microvascular function and structure in asymptomatic patients with type 2 diabetes.  
11 *Diabetologia*. 2016;59(2):371-378. doi:10.1007/s00125-015-3799-x  
12  
13 26. Andersen MJ, Ersbøll M, Axelsson A, et al. Sildenafil and diastolic dysfunction after acute myocardial  
14 infarction in patients with preserved ejection fraction: The sildenafil and diastolic dysfunction after  
15 acute myocardial infarction (SIDAMI) trial. *Circulation*. 2013;127(11):1200-1208.  
16 doi:10.1161/CIRCULATIONAHA.112.000056  
17  
18  
19  
20  
21  
22  
23  
24  
25  
26  
27  
28  
29  
30  
31  
32  
33  
34  
35  
36  
37  
38  
39  
40  
41  
42  
43  
44  
45  
46  
47  
48  
49  
50  
51  
52  
53  
54  
55  
56  
57  
58  
59  
60

1  
2  
3  
4  
5  
6  
7  
8  
9  
10  
11  
12  
13  
14  
15  
16  
17  
18  
19  
20  
21  
22  
23  
24  
25  
26  
27  
28  
29  
30  
31  
32  
33  
34  
35  
36  
37  
38  
39  
40  
41  
42  
43  
44  
45  
46  
47  
48  
49  
50  
51  
52  
53  
54  
55  
56  
57  
58  
59  
60

For peer review only



**Table 1 Inclusion and exclusion criteria****Inclusion criteria**

- ▶ T2D (WHO criteria), diagnosed at least 3 months before screening
- ▶ For patients on background therapy: No change in anti-diabetic therapy within 30 days prior to baseline
- ▶ Hba1c of  $\geq 48$  mmol/L and  $\leq 86$  mmol/L at screening for patients on background therapy or Hba1c of  $\geq 48$  mmol/L and  $\leq 75$  mmol/L at screening for drug-naïve patients
- ▶ Age  $\geq 18$  years
- ▶ BMI  $\leq 45$  kg/m
- ▶ Negative pregnancy test (fertile women). Fertile women must use safe contraceptives (spiral, hormonal contraceptives) for the duration of the study
- ▶ Able to understand the written patient information and to give informed consent
- ▶ High cardiovascular risk, defined as at least one of the following:
  - ACR  $\geq 30$  mg/g
  - NT-proBNP  $\geq 70$  pg/mL
  - Confirmed history of myocardial infarction  $> 2$  months prior to baseline
  - Heart failure according to Framingham Heart Failure Criteria
  - Discharged from hospital with a documented diagnosis of UA  $\leq 12$  months prior to baseline
  - Evidence of coronary artery disease by CAG in one or more major coronary arteries OR at least one of the following: a positive noninvasive stress test, or a positive stress echocardiography showing regional systolic wall motion abnormalities, or a positive scintigraphic test showing stress-induced ischemia
  - History of ischemic or hemorrhagic stroke  $> 2$  months prior to informed consent
  - Presence of peripheral artery disease such as: previous limb angioplasty, stenting or bypass surgery; or previous limb or foot amputation due to circulatory insufficiency; or angiographic evidence of significant ( $> 50\%$ ) peripheral artery stenosis in at least one limb; or evidence from a non-invasive measurement of significant ( $>50\%$  or as reported as hemodynamically significant) peripheral artery stenosis in at least one limb; or ankle brachial index of  $< 0.9$

**Exclusion criteria**

- ▶ Allergic to the study medication
- ▶ Treatment with SGLT-2 inhibitor within 1 month prior to baseline
- ▶ Impaired kidney function, eGFR  $\leq 30$  ml/min
- ▶ Severe liver insufficiency (Child-Pugh class C)
- ▶ ECG showing malign ventricular arrhythmia or prolonged QT-interval ( $>500$ ms)
- ▶ Untreated clinically significant heart valve disease
- ▶ Planned cardiac surgery or angioplasty within 3 months.
- ▶ Myocardial infarction (MI)  $\leq 30$  days prior to baseline
- ▶ Percutaneous coronary intervention (PCI)  $\leq 4$  weeks prior to baseline
- ▶ History of coronary artery bypass graft (CABG)  $\leq 8$  weeks prior to enrollment
- ▶ Prior history of heart transplantation
- ▶ Unstable angina, known severe left main coronary artery stenosis, severe heart failure, uncontrolled arrhythmias, symptomatic hypotension or severe hypertension (systolic blood pressure  $< 90$  or  $> 180$  mmHg, respectively), sick sinus syndrome or  $>$  first degree atrioventricular block in the absence of a functioning pacemaker
- ▶ Requirement of emergent cardiac medical intervention or catheterization
- ▶ Treatment with theophylline, or medications containing theophylline
- ▶ History of known or suspected bronchoconstrictive or bronchospastic lung disease (e.g., asthma)
- ▶ Not using safe contraception
- ▶ Pregnancy or desire hereof or breastfeeding.

**Table 2 Overview of study visits**

| Visit                                    | V <sub>0</sub> | V <sub>1</sub> | T <sub>1</sub> | V <sub>2</sub> | T <sub>2</sub> | V <sub>3</sub> |
|------------------------------------------|----------------|----------------|----------------|----------------|----------------|----------------|
| Time, weeks                              | -4±1           | 0±1            | 2±1            | 4±1            | 8±1            | 12±1           |
| Inclusion/exclusion criteria             | X              | X              |                |                |                |                |
| Medical history                          | X              |                |                |                |                |                |
| Informed consent                         | X              |                |                |                |                |                |
| Blood samples, non-fasting               | X              |                |                | X              |                |                |
| Physical examination                     | X              |                |                | X              |                |                |
| Adverse events                           |                | X              | X              | X              | X              | X              |
| <b>Endpoints, Main study</b>             |                |                |                |                |                |                |
| <sup>82</sup> Rb -PET (primary endpoint) |                | X              |                |                |                | X              |
| Echocardiography                         |                | X              |                |                |                | X              |
| Ambulatory BP                            |                | X              |                |                |                | X              |
| Adipose tissue biopsy                    |                | X              |                |                |                | X              |
| Oral glucose tolerance test              |                | X              |                |                |                | X              |
| Questionnaires                           |                | X              |                |                |                | X              |
| HRV                                      |                | X              |                |                |                | X              |
| PWA                                      |                | X              |                |                |                | X              |
| <sup>51</sup> Cr EDTA clearance          |                | X              |                |                |                | X              |
| Body composition (DEXA)                  |                | X              |                |                |                | X              |
| Blood samples, fasting                   |                | X              |                |                |                | X              |
| Urine samples, fasting                   |                | X              |                |                |                | X              |
| <b>Endpoints, substudy</b>               |                |                |                |                |                |                |
| Hemodynamics (key secondary endpoint)    |                | X              |                |                |                | X              |
| Accelerometer                            |                | X              |                |                |                | X              |

1  
2  
3  
4  
5  
6  
7  
8  
9  
10  
11  
12  
13  
14  
15  
16  
17  
18  
19  
20  
21  
22  
23  
24  
25  
26  
27  
28  
29  
30  
31  
32  
33  
34  
35  
36  
37  
38  
39  
40  
41  
42  
43  
44  
45  
46  
47  
48  
49  
50  
51  
52  
53  
54  
55  
56  
57  
58  
59  
60

For peer review only

Figure 1  
Time-line of the study visits

Week -4±1  
1  
2  
3  
4  
5  
6  
7 Week 0±1  
8  
9  
10  
11 Week 2±1  
12  
13  
14  
15 Week 4±1  
16  
17  
18  
19 Week 8±1  
20  
21  
22  
23  
24 Week 12±1  
25

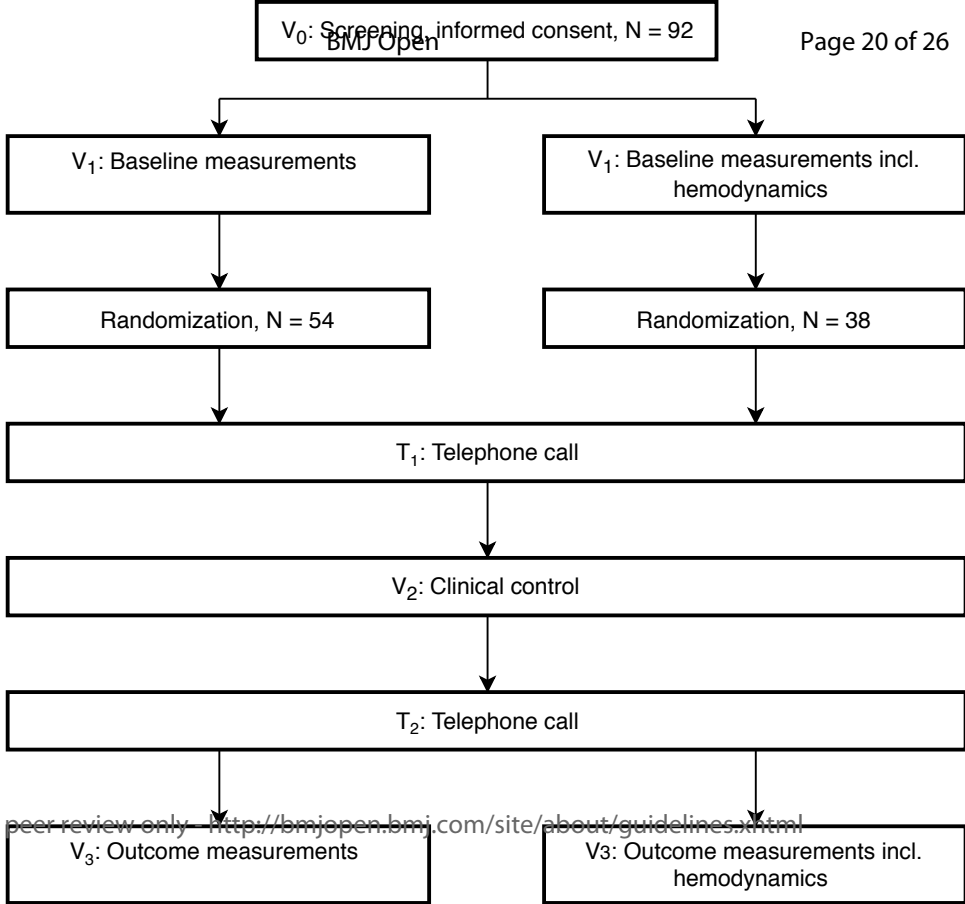

# Reporting checklist for protocol of a clinical trial.

Based on the SPIRIT guidelines.

## Instructions to authors

Complete this checklist by entering the page numbers from your manuscript where readers will find each of the items listed below.

Your article may not currently address all the items on the checklist. Please modify your text to include the missing information. If you are certain that an item does not apply, please write "n/a" and provide a short explanation.

Upload your completed checklist as an extra file when you submit to a journal.

In your methods section, say that you used the SPIRIT reporting guidelines, and cite them as:

Chan A-W, Tetzlaff JM, Altman DG, Laupacis A, Gøtzsche PC, Krleža-Jerić K, Hróbjartsson A, Mann H, Dickersin K, Berlin J, Doré C, Parulekar W, Summerskill W, Groves T, Schulz K, Sox H, Rockhold FW, Rennie D, Moher D. SPIRIT 2013 Statement: Defining standard protocol items for clinical trials. *Ann Intern Med.* 2013;158(3):200-207

|                                             |     | Reporting Item                                                                                               | Page Number   |
|---------------------------------------------|-----|--------------------------------------------------------------------------------------------------------------|---------------|
| Title                                       | #1  | Descriptive title identifying the study design, population, interventions, and, if applicable, trial acronym | 1             |
| Trial registration                          | #2a | Trial identifier and registry name. If not yet registered, name of intended registry                         | 2             |
| Trial registration: data set                | #2b | All items from the World Health Organization Trial Registration Data Set                                     | See note<br>1 |
| Protocol version                            | #3  | Date and version identifier                                                                                  | 2             |
| Funding                                     | #4  | Sources and types of financial, material, and other support                                                  | 11            |
| Roles and responsibilities: contributorship | #5a | Names, affiliations, and roles of protocol contributors                                                      | 1,11          |
| Roles and responsibilities:                 | #5b | Name and contact information for the trial sponsor                                                           | See note<br>2 |

|    |                      |      |                                                                          |          |
|----|----------------------|------|--------------------------------------------------------------------------|----------|
| 1  | sponsor contact      |      |                                                                          |          |
| 2  | information          |      |                                                                          |          |
| 3  |                      |      |                                                                          |          |
| 4  | Roles and            | #5c  | Role of study sponsor and funders, if any, in study design;              | See note |
| 5  | responsibilities:    |      | collection, management, analysis, and interpretation of data; writing    | 3        |
| 6  | sponsor and funder   |      | of the report; and the decision to submit the report for publication,    |          |
| 7  |                      |      | including whether they will have ultimate authority over any of these    |          |
| 8  |                      |      | activities                                                               |          |
| 9  |                      |      |                                                                          |          |
| 10 |                      |      |                                                                          |          |
| 11 |                      |      |                                                                          |          |
| 12 | Roles and            | #5d  | Composition, roles, and responsibilities of the coordinating centre,     | n/a      |
| 13 | responsibilities:    |      | steering committee, endpoint adjudication committee, data                |          |
| 14 | committees           |      | management team, and other individuals or groups overseeing the          |          |
| 15 |                      |      | trial, if applicable (see Item 21a for data monitoring committee)        |          |
| 16 |                      |      |                                                                          |          |
| 17 |                      |      |                                                                          |          |
| 18 |                      |      |                                                                          |          |
| 19 | Background and       | #6a  | Description of research question and justification for undertaking the   | 2-4      |
| 20 | rationale            |      | trial, including summary of relevant studies (published and              |          |
| 21 |                      |      | unpublished) examining benefits and harms for each intervention          |          |
| 22 |                      |      |                                                                          |          |
| 23 |                      |      |                                                                          |          |
| 24 | Background and       | #6b  | Explanation for choice of comparators                                    | See note |
| 25 | rationale: choice of |      |                                                                          | 4        |
| 26 | comparators          |      |                                                                          |          |
| 27 |                      |      |                                                                          |          |
| 28 |                      |      |                                                                          |          |
| 29 | Objectives           | #7   | Specific objectives or hypotheses                                        | 4        |
| 30 |                      |      |                                                                          |          |
| 31 |                      |      |                                                                          |          |
| 32 | Trial design         | #8   | Description of trial design including type of trial (eg, parallel group, | 4        |
| 33 |                      |      | crossover, factorial, single group), allocation ratio, and framework     |          |
| 34 |                      |      | (eg, superiority, equivalence, non-inferiority, exploratory)             |          |
| 35 |                      |      |                                                                          |          |
| 36 |                      |      |                                                                          |          |
| 37 | Study setting        | #9   | Description of study settings (eg, community clinic, academic            | 4        |
| 38 |                      |      | hospital) and list of countries where data will be collected. Reference  |          |
| 39 |                      |      | to where list of study sites can be obtained                             |          |
| 40 |                      |      |                                                                          |          |
| 41 |                      |      |                                                                          |          |
| 42 | Eligibility criteria | #10  | Inclusion and exclusion criteria for participants. If applicable,        | 14       |
| 43 |                      |      | eligibility criteria for study centres and individuals who will perform  |          |
| 44 |                      |      | the interventions (eg, surgeons, psychotherapists)                       |          |
| 45 |                      |      |                                                                          |          |
| 46 |                      |      |                                                                          |          |
| 47 |                      |      |                                                                          |          |
| 48 | Interventions:       | #11a | Interventions for each group with sufficient detail to allow             | 4-5      |
| 49 | description          |      | replication, including how and when they will be administered            |          |
| 50 |                      |      |                                                                          |          |
| 51 |                      |      |                                                                          |          |
| 52 | Interventions:       | #11b | Criteria for discontinuing or modifying allocated interventions for a    | See note |
| 53 | modifications        |      | given trial participant (eg, drug dose change in response to harms,      | 5        |
| 54 |                      |      | participant request, or improving / worsening disease)                   |          |
| 55 |                      |      |                                                                          |          |
| 56 |                      |      |                                                                          |          |
| 57 | Interventions:       | #11c | Strategies to improve adherence to intervention protocols, and any       | See note |
| 58 | adherence            |      | procedures for monitoring adherence (eg, drug tablet return;             | 6        |
| 59 |                      |      |                                                                          |          |
| 60 |                      |      |                                                                          |          |

|    |                      |                   |                                                                        |
|----|----------------------|-------------------|------------------------------------------------------------------------|
|    |                      | laboratory tests) |                                                                        |
| 1  |                      |                   |                                                                        |
| 2  |                      |                   |                                                                        |
| 3  | Interventions:       | #11d              | Relevant concomitant care and interventions that are permitted or      |
| 4  | concomitant care     |                   | prohibited during the trial                                            |
| 5  |                      |                   |                                                                        |
| 6  | Outcomes             | #12               | Primary, secondary, and other outcomes, including the specific         |
| 7  |                      |                   | measurement variable (eg, systolic blood pressure), analysis metric    |
| 8  |                      |                   | (eg, change from baseline, final value, time to event), method of      |
| 9  |                      |                   | aggregation (eg, median, proportion), and time point for each          |
| 10 |                      |                   | outcome. Explanation of the clinical relevance of chosen efficacy      |
| 11 |                      |                   | and harm outcomes is strongly recommended                              |
| 12 |                      |                   |                                                                        |
| 13 |                      |                   |                                                                        |
| 14 |                      |                   |                                                                        |
| 15 |                      |                   |                                                                        |
| 16 | Participant timeline | #13               | Time schedule of enrolment, interventions (including any run-ins       |
| 17 |                      |                   | and washouts), assessments, and visits for participants. A schematic   |
| 18 |                      |                   | diagram is highly recommended (see Figure)                             |
| 19 |                      |                   |                                                                        |
| 20 |                      |                   |                                                                        |
| 21 | Sample size          | #14               | Estimated number of participants needed to achieve study objectives    |
| 22 |                      |                   | and how it was determined, including clinical and statistical          |
| 23 |                      |                   | assumptions supporting any sample size calculations                    |
| 24 |                      |                   |                                                                        |
| 25 |                      |                   |                                                                        |
| 26 | Recruitment          | #15               | Strategies for achieving adequate participant enrolment to reach       |
| 27 |                      |                   | target sample size                                                     |
| 28 |                      |                   |                                                                        |
| 29 |                      |                   |                                                                        |
| 30 | Allocation: sequence | #16a              | Method of generating the allocation sequence (eg, computer-            |
| 31 | generation           |                   | generated random numbers), and list of any factors for stratification. |
| 32 |                      |                   | To reduce predictability of a random sequence, details of any          |
| 33 |                      |                   | planned restriction (eg, blocking) should be provided in a separate    |
| 34 |                      |                   | document that is unavailable to those who enrol participants or        |
| 35 |                      |                   | assign interventions                                                   |
| 36 |                      |                   |                                                                        |
| 37 |                      |                   |                                                                        |
| 38 |                      |                   |                                                                        |
| 39 |                      |                   |                                                                        |
| 40 | Allocation           | #16b              | Mechanism of implementing the allocation sequence (eg, central         |
| 41 | concealment          |                   | telephone; sequentially numbered, opaque, sealed envelopes),           |
| 42 | mechanism            |                   | describing any steps to conceal the sequence until interventions are   |
| 43 |                      |                   | assigned                                                               |
| 44 |                      |                   |                                                                        |
| 45 |                      |                   |                                                                        |
| 46 |                      |                   |                                                                        |
| 47 | Allocation:          | #16c              | Who will generate the allocation sequence, who will enrol              |
| 48 | implementation       |                   | participants, and who will assign participants to interventions        |
| 49 |                      |                   |                                                                        |
| 50 |                      |                   |                                                                        |
| 51 | Blinding (masking)   | #17a              | Who will be blinded after assignment to interventions (eg, trial       |
| 52 |                      |                   | participants, care providers, outcome assessors, data analysts), and   |
| 53 |                      |                   | how                                                                    |
| 54 |                      |                   |                                                                        |
| 55 |                      |                   |                                                                        |
| 56 | Blinding (masking):  | #17b              | If blinded, circumstances under which unblinding is permissible, and   |
| 57 | emergency            |                   | procedure for revealing a participant's allocated intervention during  |
| 58 |                      |                   |                                                                        |
| 59 |                      |                   |                                                                        |
| 60 |                      |                   |                                                                        |

|    |                        |      |                                                                         |          |
|----|------------------------|------|-------------------------------------------------------------------------|----------|
| 1  | unblinding             |      | the trial                                                               |          |
| 2  |                        |      |                                                                         |          |
| 3  | Data collection plan   | #18a | Plans for assessment and collection of outcome, baseline, and other     | 9        |
| 4  |                        |      | trial data, including any related processes to promote data quality     |          |
| 5  |                        |      | (eg, duplicate measurements, training of assessors) and a description   |          |
| 6  |                        |      | of study instruments (eg, questionnaires, laboratory tests) along with  |          |
| 7  |                        |      | their reliability and validity, if known. Reference to where data       |          |
| 8  |                        |      | collection forms can be found, if not in the protocol                   |          |
| 9  |                        |      |                                                                         |          |
| 10 |                        |      |                                                                         |          |
| 11 |                        |      |                                                                         |          |
| 12 | Data collection plan:  | #18b | Plans to promote participant retention and complete follow-up,          | See note |
| 13 | retention              |      | including list of any outcome data to be collected for participants     | 7        |
| 14 |                        |      | who discontinue or deviate from intervention protocols                  |          |
| 15 |                        |      |                                                                         |          |
| 16 |                        |      |                                                                         |          |
| 17 | Data management        | #19  | Plans for data entry, coding, security, and storage, including any      | 9        |
| 18 |                        |      | related processes to promote data quality (eg, double data entry;       |          |
| 19 |                        |      | range checks for data values). Reference to where details of data       |          |
| 20 |                        |      | management procedures can be found, if not in the protocol              |          |
| 21 |                        |      |                                                                         |          |
| 22 |                        |      |                                                                         |          |
| 23 |                        |      |                                                                         |          |
| 24 | Statistics: outcomes   | #20a | Statistical methods for analysing primary and secondary outcomes.       | 9        |
| 25 |                        |      | Reference to where other details of the statistical analysis plan can   |          |
| 26 |                        |      | be found, if not in the protocol                                        |          |
| 27 |                        |      |                                                                         |          |
| 28 |                        |      |                                                                         |          |
| 29 |                        |      |                                                                         |          |
| 30 | Statistics: additional | #20b | Methods for any additional analyses (eg, subgroup and adjusted          | 9        |
| 31 | analyses               |      | analyses)                                                               |          |
| 32 |                        |      |                                                                         |          |
| 33 |                        |      |                                                                         |          |
| 34 | Statistics: analysis   | #20c | Definition of analysis population relating to protocol non-adherence    | 9        |
| 35 | population and         |      | (eg, as randomised analysis), and any statistical methods to handle     |          |
| 36 | missing data           |      | missing data (eg, multiple imputation)                                  |          |
| 37 |                        |      |                                                                         |          |
| 38 |                        |      |                                                                         |          |
| 39 | Data monitoring:       | #21a | Composition of data monitoring committee (DMC); summary of its          | See note |
| 40 | formal committee       |      | role and reporting structure; statement of whether it is independent    | 8        |
| 41 |                        |      | from the sponsor and competing interests; and reference to where        |          |
| 42 |                        |      | further details about its charter can be found, if not in the protocol. |          |
| 43 |                        |      | Alternatively, an explanation of why a DMC is not needed                |          |
| 44 |                        |      |                                                                         |          |
| 45 |                        |      |                                                                         |          |
| 46 |                        |      |                                                                         |          |
| 47 | Data monitoring:       | #21b | Description of any interim analyses and stopping guidelines,            | n/a      |
| 48 | interim analysis       |      | including who will have access to these interim results and make the    |          |
| 49 |                        |      | final decision to terminate the trial                                   |          |
| 50 |                        |      |                                                                         |          |
| 51 |                        |      |                                                                         |          |
| 52 | Harms                  | #22  | Plans for collecting, assessing, reporting, and managing solicited and  | 5        |
| 53 |                        |      | spontaneously reported adverse events and other unintended effects      |          |
| 54 |                        |      | of trial interventions or trial conduct                                 |          |
| 55 |                        |      |                                                                         |          |
| 56 |                        |      |                                                                         |          |
| 57 |                        |      |                                                                         |          |
| 58 | Auditing               | #23  | Frequency and procedures for auditing trial conduct, if any, and        | 10       |
| 59 |                        |      |                                                                         |          |
| 60 |                        |      |                                                                         |          |



|    |                       |      |                                                                          |          |
|----|-----------------------|------|--------------------------------------------------------------------------|----------|
| 1  |                       |      | whether the process will be independent from investigators and the       |          |
| 2  |                       |      | sponsor                                                                  |          |
| 3  |                       |      |                                                                          |          |
| 4  | Research ethics       | #24  | Plans for seeking research ethics committee / institutional review       | See note |
| 5  | approval              |      | board (REC / IRB) approval                                               | 9        |
| 6  |                       |      |                                                                          |          |
| 7  |                       |      |                                                                          |          |
| 8  | Protocol amendments   | #25  | Plans for communicating important protocol modifications (eg,            | See note |
| 9  |                       |      | changes to eligibility criteria, outcomes, analyses) to relevant parties | 10       |
| 10 |                       |      | (eg, investigators, REC / IRBs, trial participants, trial registries,    |          |
| 11 |                       |      | journals, regulators)                                                    |          |
| 12 |                       |      |                                                                          |          |
| 13 |                       |      |                                                                          |          |
| 14 | Consent or assent     | #26a | Who will obtain informed consent or assent from potential trial          | 4,5,11   |
| 15 |                       |      | participants or authorised surrogates, and how (see Item 32)             |          |
| 16 |                       |      |                                                                          |          |
| 17 |                       |      |                                                                          |          |
| 18 | Consent or assent:    | #26b | Additional consent provisions for collection and use of participant      | n/a      |
| 19 | ancillary studies     |      | data and biological specimens in ancillary studies, if applicable        |          |
| 20 |                       |      |                                                                          |          |
| 21 |                       |      |                                                                          |          |
| 22 | Confidentiality       | #27  | How personal information about potential and enrolled participants       | 9        |
| 23 |                       |      | will be collected, shared, and maintained in order to protect            |          |
| 24 |                       |      | confidentiality before, during, and after the trial                      |          |
| 25 |                       |      |                                                                          |          |
| 26 |                       |      |                                                                          |          |
| 27 | Declaration of        | #28  | Financial and other competing interests for principal investigators      | 11       |
| 28 | interests             |      | for the overall trial and each study site                                |          |
| 29 |                       |      |                                                                          |          |
| 30 |                       |      |                                                                          |          |
| 31 | Data access           | #29  | Statement of who will have access to the final trial dataset, and        | See note |
| 32 |                       |      | disclosure of contractual agreements that limit such access for          | 11       |
| 33 |                       |      | investigators                                                            |          |
| 34 |                       |      |                                                                          |          |
| 35 |                       |      |                                                                          |          |
| 36 | Ancillary and post    | #30  | Provisions, if any, for ancillary and post-trial care, and for           | n/a      |
| 37 | trial care            |      | compensation to those who suffer harm from trial participation           | (none)   |
| 38 |                       |      |                                                                          |          |
| 39 |                       |      |                                                                          |          |
| 40 | Dissemination policy: | #31a | Plans for investigators and sponsor to communicate trial results to      | 10       |
| 41 | trial results         |      | participants, healthcare professionals, the public, and other relevant   |          |
| 42 |                       |      | groups (eg, via publication, reporting in results databases, or other    |          |
| 43 |                       |      | data sharing arrangements), including any publication restrictions       |          |
| 44 |                       |      |                                                                          |          |
| 45 |                       |      |                                                                          |          |
| 46 |                       |      |                                                                          |          |
| 47 | Dissemination policy: | #31b | Authorship eligibility guidelines and any intended use of                | See note |
| 48 | authorship            |      | professional writers                                                     | 12       |
| 49 |                       |      |                                                                          |          |
| 50 |                       |      |                                                                          |          |
| 51 | Dissemination policy: | #31c | Plans, if any, for granting public access to the full protocol,          | 10       |
| 52 | reproducible research |      | participant-level dataset, and statistical code                          |          |
| 53 |                       |      |                                                                          |          |
| 54 |                       |      |                                                                          |          |
| 55 | Informed consent      | #32  | Model consent form and other related documentation given to              | See note |
| 56 | materials             |      | participants and authorised surrogates                                   | 13       |
| 57 |                       |      |                                                                          |          |
| 58 |                       |      |                                                                          |          |
| 59 |                       |      |                                                                          |          |
| 60 |                       |      |                                                                          |          |

1 Biological specimens #33 Plans for collection, laboratory evaluation, and storage of biological n/a  
2 specimens for genetic or molecular analysis in the current trial and  
3 for future use in ancillary studies, if applicable  
4  
5  
6

## 7 Author notes

- 9 1. n/a (not used)
- 11 2. 1 (The corresponding author is Sponsor-Investigator)
- 13 3. 1,11 (see above)
- 15 4. n/a (short, low risk trial)
- 17 5. n/a (no specific criteria)
- 19 6. n/a (no strategies)
- 21 7. n/a (no plans)
- 23 8. n/a (short, low risk study)
- 25 9. 2 (already approved)
- 27 10. n/a (no further modifications are expected)
- 29 11. 10 (public access)
- 31 12. n/a (standard guideline (Vancouver), no professional writers)
- 33 13. n/a (attached in seperate file)

35 The SPIRIT checklist is distributed under the terms of the Creative Commons Attribution License CC-BY-ND  
37 3.0. This checklist was completed on 11. January 2019 using <https://www.goodreports.org/>, a tool made by the  
39 [EQUATOR Network](#) in collaboration with [Penelope.ai](#)  
41  
42  
43  
44  
45  
46  
47  
48  
49  
50  
51  
52  
53  
54  
55  
56  
57  
58  
59

# BMJ Open

## Design of a randomized controlled trial of the effects of empagliflozin on myocardial perfusion, function and metabolism in type 2 diabetes patients at high cardiovascular risk (The SIMPLE trial)

|                                 |                                                                                                                                                                                                                                                                                                                                                                                                                                                                                                                                                                                                                                                                                                                                                                                                                                                                                                                                                                                                                                                                                       |
|---------------------------------|---------------------------------------------------------------------------------------------------------------------------------------------------------------------------------------------------------------------------------------------------------------------------------------------------------------------------------------------------------------------------------------------------------------------------------------------------------------------------------------------------------------------------------------------------------------------------------------------------------------------------------------------------------------------------------------------------------------------------------------------------------------------------------------------------------------------------------------------------------------------------------------------------------------------------------------------------------------------------------------------------------------------------------------------------------------------------------------|
| Journal:                        | <i>BMJ Open</i>                                                                                                                                                                                                                                                                                                                                                                                                                                                                                                                                                                                                                                                                                                                                                                                                                                                                                                                                                                                                                                                                       |
| Manuscript ID                   | bmjopen-2019-029098.R2                                                                                                                                                                                                                                                                                                                                                                                                                                                                                                                                                                                                                                                                                                                                                                                                                                                                                                                                                                                                                                                                |
| Article Type:                   | Protocol                                                                                                                                                                                                                                                                                                                                                                                                                                                                                                                                                                                                                                                                                                                                                                                                                                                                                                                                                                                                                                                                              |
| Date Submitted by the Author:   | 11-Sep-2019                                                                                                                                                                                                                                                                                                                                                                                                                                                                                                                                                                                                                                                                                                                                                                                                                                                                                                                                                                                                                                                                           |
| Complete List of Authors:       | Jürgens, Mikkel; Herlev Hospital, Schou, Morten; Herlev Hospital, Cardiology<br>Hasbak, Philip; Copenhagen University Hospital, Rigshospitalet, Clinical Physiology, Nuclear Medicine & PET 4011, Cluster of Molecular Imaging<br>kjær, andreas; Copenhagen University Hospital, Rigshospitalet, Clinical Physiology, Nuclear Medicine & PET 4011, Cluster of Molecular Imaging<br>Wolsk, Emil; Rigshospitalet, Department of Cardiology - The Heart Centre<br>Zerahn, Bo; Herlev and Gentofte Hospital, University of Copenhagen, Department of Clinical Physiology and Nuclear Medicine<br>Wiberg, Mikkel; Herlev Hospital, Medicine<br>Brandt, Niels; Herlev and Gentofte Hospital, University of Copenhagen, Department of medicine<br>Gæde, Peter; Slagelse Sygehus<br>Rossing, Peter; Steno Diabetes Center AS<br>Faber, J; Herlev Hospital, Medicine<br>Inzucchi, Silvio; Yale School of Medicine, Section of Endocrinology<br>Gustafsson, Finn; Rigshospitalet, Department of Cardiology - The Heart Centre<br>Kistorp, Caroline; Rigshospitalet, Department of Endocrinology |
| <b>Primary Subject Heading</b>: | Diabetes and endocrinology                                                                                                                                                                                                                                                                                                                                                                                                                                                                                                                                                                                                                                                                                                                                                                                                                                                                                                                                                                                                                                                            |
| Secondary Subject Heading:      | Cardiovascular medicine                                                                                                                                                                                                                                                                                                                                                                                                                                                                                                                                                                                                                                                                                                                                                                                                                                                                                                                                                                                                                                                               |
| Keywords:                       | Diabetic nephropathy & vascular disease < DIABETES & ENDOCRINOLOGY, RADIOLOGY, CARDIOLOGY, Cardiovascular imaging < RADIOLOGY & IMAGING                                                                                                                                                                                                                                                                                                                                                                                                                                                                                                                                                                                                                                                                                                                                                                                                                                                                                                                                               |
|                                 |                                                                                                                                                                                                                                                                                                                                                                                                                                                                                                                                                                                                                                                                                                                                                                                                                                                                                                                                                                                                                                                                                       |

SCHOLARONE™  
Manuscripts

# Design of a randomized controlled trial of the effects of empagliflozin on myocardial perfusion, function and metabolism in type 2 diabetes patients at high cardiovascular risk (The SIMPLE trial)

---

Mikkel Jürgens<sup>1</sup>, Morten Schou<sup>2,3</sup>, Philip Hasbak<sup>4</sup>, Andreas Kjær<sup>4</sup>, Emil Wolsk<sup>5</sup>, Bo Zerahn<sup>6</sup>,  
Mikkel Wiberg<sup>1</sup>, Niels Brandt<sup>7</sup>, Peter Gæde<sup>8</sup>, Peter Rossing<sup>3,9</sup>, Jens Faber<sup>1,3</sup>, Silvio E.  
Inzucchi<sup>10</sup>, Finn Gustafsson<sup>4,9</sup>, Caroline Kistorp<sup>3,7</sup>

---

## Author e-mail addresses:

Mikkel Jürgens: [mikkel.juergens.01@regionh.dk](mailto:mikkel.juergens.01@regionh.dk); Morten Schou: [morten.schou.04@regionh.dk](mailto:morten.schou.04@regionh.dk); Philip Hasbak: [Philip.Hasbak@regionh.dk](mailto:Philip.Hasbak@regionh.dk); Andreas Kjær: [Andreas.Kjaer@regionh.dk](mailto:Andreas.Kjaer@regionh.dk); Emil Wolsk: [emil.wolsk@regionh.dk](mailto:emil.wolsk@regionh.dk); Bo Zerahn: [Bo.Zerahn@regionh.dk](mailto:Bo.Zerahn@regionh.dk); Mikkel Wiberg: [Mikkel\\_Wiberg@hotmail.com](mailto:Mikkel_Wiberg@hotmail.com); Niels Brandt: [niels.hoeeg.brandt-jacobsen@regionh.dk](mailto:niels.hoeeg.brandt-jacobsen@regionh.dk); Peter Gæde: [peter.haulund.gaede@regionh.dk](mailto:peter.haulund.gaede@regionh.dk); Peter Rossing: [peter.rossing@regionh.dk](mailto:peter.rossing@regionh.dk); Jens Faber: [Jens.Faber@regionh.dk](mailto:Jens.Faber@regionh.dk); Silvio E. Inzucchi: [silvio.inzucchi@yale.edu](mailto:silvio.inzucchi@yale.edu); Finn Gustafsson: [Finn.Gustafsson@regionh.dk](mailto:Finn.Gustafsson@regionh.dk); Caroline Kistorp: [caroline.michaela.kistorp@regionh.dk](mailto:caroline.michaela.kistorp@regionh.dk)

**Word count: 3147**

**Mesh terms: Diabetes Mellitus, Type 2; Sodium-Glucose Transporter 2 Inhibitors, Cardiovascular Diseases, Myocardial Perfusion Imaging, Cardiac Catheterization**

**Correspondence to: Caroline Kistorp, Medicinsk Endokrinologisk Klinik, Rigshospitalet, Blegdamsvej 9, 2100 Copenhagen; +45 3545 9642; [caroline.michaela.kistorp@regionh.dk](mailto:caroline.michaela.kistorp@regionh.dk)**

## ABSTRACT

---

**Introduction:** A diagnosis of type 2 diabetes (T2D) more than doubles the risk of cardiovascular disease (CVD), with heart failure (HF) being one of the most common complications with a severe prognosis. The landmark EMPA-REG study demonstrated that treatment with the sodium glucose cotransporter-2 (SGLT-

1 2) inhibitor empagliflozin rapidly and significantly reduces CVD mortality and admission rates for HF.  
2 However, the mechanisms behind this reduction in clinical events are unknown.

3 The current study was designed to investigate the effects of the SGLT-2 inhibitor empagliflozin on  
4 myocardial perfusion and function in patients with T2D and high CVD risk.

5 **Methods and analysis:** In this investigator-initiated, randomized, double-blind controlled clinical trial, 92  
6 patients with T2D and established CVD or high CVD risk, will be randomized to treatment with  
7 empagliflozin 25 mg or a matching placebo for 13 weeks. The primary outcome measure is change in  
8 myocardial flow reserve measured quantitatively by Rubidium-82 position emission tomography (<sup>82</sup>Rb-  
9 PET). In a substudy, invasive hemodynamics at rest and during exercise will be measured at baseline  
10 and following the intervention, using right heart catheterization.

11 **Ethics and dissemination:** The study protocol (v7, 02/08/2018) has been approved by the Ethics  
12 Committee of the Capital Region, Danish Data Protection Board and the Danish Medicines Agency, and it  
13 will be monitored according to the Good Clinical Practice (GCP) regulations from the International  
14 Conference on Harmonization. The results be submitted to international peer-reviewed journals and be  
15 presented at conferences. The data will be made available to the public via EudraCT and  
16 www.clinicaltrials.gov.

17 **Trial Registration:** ClinicalTrials.gov Identifier: NCT03151343, EudraCT number: 2016-003743-10

## 19 ARTICLE SUMMARY

### 20 Strengths and limitations of this study:

- 21 • Double-blinded, randomized and placebo controlled.
- 22 • The use of advanced imaging techniques.
- 23 • Single-center
- 24 • No hard endpoints, all outcomes are based on surrogates

## 26 INTRODUCTION

27 Type 2 diabetes (T2D) is a significant risk factor for cardiovascular disease (CVD), including heart failure (HF),  
28 and improved glycaemic control is only modestly beneficial in reducing macrovascular disease.<sup>1</sup>

29 In 2008, prompted by concerns that the T2D drug rosiglitazone might increase the risk of myocardial infarction,  
30 the U.S. Food & Drug Administration published guidelines effectively mandating large cardiovascular outcome

1  
2  
3  
4 1 trials for new T2D drugs. Several such trials have been completed or are ongoing. The trials have primarily  
5 2 examined the safety of dipeptidyl peptidase 4 (DPP-IV) inhibitors, glucagon-like peptide-1 receptor agonists  
6 3 (GLP-1 RA) and sodium–glucose cotransporter 2 (SGLT2) inhibitors.<sup>2–8</sup> The DPP-IV inhibitor trial SAVOR-TIMI  
7 4 indicated an increase in the secondary endpoint, hospitalization due to HF with the active comparator, while  
8 5 another DPP-IV trial, TECOS, as well as the newly published CARMELINA did not demonstrate an increased risk  
9 6 with the active drug. The GLP-1 RA trials LEADER and SUSTAIN although with a reduction in the primary MACE  
10 7 endpoint were neutral with regards to risk of HF. Most of the SGLT-2 trials have demonstrated CV benefits<sup>9</sup> via  
11 8 a reduction of the primary endpoint MACE. In the EMPA-REG outcome study, the SGLT-2 inhibitor empagliflozin  
12 9 reduced the risk of CV death by 38% and in contrast to the GLP-1 RA trials, admission due to HF by 35% in a  
13 10 high-risk T2D population.<sup>6,10</sup>

11 11 The novel evidence from the SGLT-2 inhibitor trials was surprising, because the treatments only had a modest  
12 12 effect on classical CV risk factors. Indeed, the mechanism behind their profound effect on CV death and risk of  
13 13 HF remains unknown, although several hypotheses have been proposed. An effect reducing the atherosclerotic  
14 14 burden is considered unlikely, because the risk of CV events was reduced within weeks of treatment<sup>11</sup>. Thus,  
15 15 the cardioprotective effect might be functional rather than anatomical. Impaired myocardial microcirculation is  
16 16 considered to play a significant role in T2D-related CVD<sup>12</sup> as well as in HF with preserved ejection fraction.<sup>13</sup>  
17 17 Furthermore, coronary vascular dysfunction, particularly decreased vasodilator capacity, is a significant  
18 18 predictor for CV death in patients with T2D.<sup>14,15</sup> Notably, T2D patients with preserved coronary vasodilation  
19 19 had the same low risk of CVD as subjects without diabetes<sup>14</sup>. Experimental studies have shown that SGLT-2  
20 20 inhibitor treatment significantly ameliorates coronary arterial and aortic (media) thickening, pericoronary  
21 21 arterial fibrosis and improves vasodilatation in diabetic rodents.<sup>16,17</sup> Thus, part of the underlying effect of  
22 22 empagliflozin in EMPA-REG could be driven by improvement in myocardial microcirculation.

23 23 A complementary hypothesis has been suggested to explain the early beneficial effects on HF  
24 24 hospitalization found in the EMPA-REG trial.<sup>18</sup> Inhibition of SGLT-2 is associated with increased diuresis, thus  
25 25 the sodium- and volume-reducing effect could favour cardiac loading conditions in patients with T2D with  
26 26 subclinical dysfunctions of the heart. The proposed effects on central hemodynamics, especially right and left  
27 27 heart filling pressures and cardiac output, can be measured directly by right heart catheterization. Pulmonary  
28 28 capillary wedge pressure (PCWP), a measure of left heart filling pressure, has previously been shown to be  
29 29 associated with functional capacity among patients with HF.<sup>19</sup> Therefore, investigating the effect of SGLT-2  
30 30 inhibitor on central hemodynamics during rest and exercise may contribute vital knowledge on the

1  
2  
3  
4 1 mechanisms behind the markedly reduced risk of admission for HF demonstrated in EMPA-REG and DECLAIRE  
5  
6 2 TIMI <sup>6,8</sup>.

7 3  
8 4 The pathogenesis of myocardial dysfunction in T2D has been linked with insulin resistance (IR)  
9  
10 5 and adipose tissue dysfunction, with an increased supply of free fatty acids (FFA) and adipocytokines mediating  
11 6 ectopic fat storage and thus increased intra-myocardial lipid accumulation, with decremental impact on cardiac  
12 7 function.<sup>20</sup> Increased glycosuria with SGLT-2 inhibitors could improve IR by indirectly increasing peripheral  
13 8 glucose uptake<sup>21</sup> through a reduction in glucose toxicity. SGLT-2 inhibitors have been shown to increase the  
14 9 glucagon-insulin ratio, presumably due to the decrease in glucose stimulus.<sup>22</sup> Moreover they induce a small  
15 10 increase in plasma ketone bodies, which some have proposed to be a preferred fuel source for the  
16 11 myocardium.<sup>23</sup> However, others have shown that SGLT-2 inhibitors increase ATP production in mouse model  
17 12 hearts, without increasing ketone oxidation.<sup>24</sup> Markers of inflammation have been associated with the risk of  
18 13 vascular events, independently of traditional risk factors and an effect on markers of inflammation status such  
19 14 as IL-6 and CRP should also be considered.<sup>25</sup> Therefore, further knowledge on the effects of SGLT-2 inhibitors  
20 15 on metabolic parameters, such as biomarkers of inflammation, adipose tissue function and the relationship  
21 16 with parameters on cardiac function in patients with T2D is warranted.

22  
23  
24  
25  
26  
27  
28  
29  
30  
31 17 In summary, SGLT2 inhibitors have been shown to reduce CVD in high-risk T2D patients, with several  
32 18 explanatory hypotheses being suggested that remain to be tested in clinical trials.

### 33 34 35 19 Hypothesis

36 20 Treatment with empagliflozin for 13 weeks improves the myocardial flow reserve (MFR) in patients with T2D  
37 21 and high cardiovascular risk. The duration of 13 weeks was chosen, as the EMPA-REG study showed a clear  
38 22 effect on the primary outcomes at this timepoint.

### 39 40 41 42 23 Objectives

43 24 The primary objective of the current trial is to evaluate the effect of empagliflozin on MFR as measured by  
44 25 <sup>82</sup>Rb-PET compared to placebo in patients with T2D and CVD or additional CV risk factors. In a sub study, the  
45 26 effect of empagliflozin on key hemodynamic parameters will be measured during right heart catheterization at  
46 27 rest and during exercise. Key secondary outcomes include changes in cardiac echocardiographic evaluations of  
47 28 systolic and diastolic functions, functional capacity by accelerometry, and changes in glucose metabolism,  
48 29 plasma ketone bodies and adipose tissue function.

## METHODS AND ANALYSIS

### Trial design

This is an investigator-initiated, randomized, placebo-controlled, double-blind trial. Participants will be recruited from the T2D and cardiology outpatient clinics at Herlev-Gentofte University Hospital, Steno Diabetes Center Copenhagen and Rigshospitalet, Denmark.

### Study population

The study will include 92 patients who have had the T2D diagnosis for at least 3 months, and with no upper limit to the duration of diabetes, who have either additional CV risk factors or pre-existing CVD. Detailed inclusion and exclusion criteria are listed in Table 1. Eligible patients will be invited for screening, and patients who meet all the criteria will be randomized to the double-blinded treatment. Participants will be considered part of the intention to treat (ITT) group after receiving the first dose of the study medication”

### Trial Intervention

Participants will be randomized 1:1 to either empagliflozin 25 mg or matching placebo once daily for 13 weeks. A cross-over design was considered but not implemented, due to the expected high availability of eligible participants. A dose of 25 mg rather than 10 mg was chosen, as previous studies have indicated a dose-response effect on metabolic outcomes such as urinary glucose excretion, fasting plasma glucose and mean daily plasma glucose, with higher drug doses resulting in lower glucose levels and increased glucose excretion.<sup>26</sup>. In accordance with the EMPA-REG study, no dose-escalation will be performed. The trial medication will be randomized in computer-generated 1:1 blocks of 10 by the study pharmacy (Glostrup Pharmacy, Copenhagen, Denmark). Participants will receive randomization numbers and the corresponding medication containers sequentially. In case of medical emergency, participants can be unblinded individually. The study medicine will be suspended if the participant becomes pregnant or withdraws consent. The investigators may suspend the medication for safety reasons.

### Patient and public involvement

The study was designed without involvement from patients or the public. The patients will be offered access to the results of the study, when these become available.



## Trial visits and procedures

### Visits

A schematic overview of the trial visits is presented in Table 2 and as a flowchart in Figure 1. At the screening visit ( $V_0$ ), informed consent will be obtained, and patients will be assessed for eligibility based on medical history, including diabetes duration and comorbidities, physical examinations and blood samples. Ineligible participants will be counted as screen failures, and the reason for screen failure will be recorded.

Outcome-related procedures are performed at the baseline ( $V_1$ ) and after 13 weeks of treatment ( $V_3$ ). The trial medication will be dispensed when all the procedures pertaining to  $V_1$  have been completed.

After 3 to 6 weeks of treatment, the participants will visit the trial site for blood tests and a physical examination ( $V_2$ ). Participant status and compliance as well as adverse events will be assessed at  $V_2$ ,  $V_3$  and during two phone calls ( $T_1$  and  $T_2$ ).

### $^{82}\text{Rb}$ -PET

Myocardial perfusion and myocardial flow reserve (MFR) will be measured using cardiac  $^{82}\text{Rb}$ -PET, which allows for flow quantification in absolute terms. To determine the MFR, measurements will be performed at rest and during adenosine-induced stress. A standard clinical protocol will be used. Participants will be scanned in the supine position using a Siemens Biograph mCT/PET 128-slice scanner (Siemens Medical Solutions, Knoxville, USA). Low-dose non-contrast CT will be acquired for attenuation correction as well as measurement of cardiac adipose tissue volume. Approximately 1100 MBq of  $^{82}\text{Rb}$  will be obtained from a CardioGen-82 Sr-82/Rb-82 generator (Bracco Diagnostics, Inc., Princeton, New Jersey, USA) and intravenously infused with a constant flowrate of 50 mL/min. List-mode 3D data acquisition will begin with the tracer infusion and continue for 7 minutes. Static and ECG-gated images will be reconstructed with a 2.5-minute delay to allow  $^{82}\text{Rb}$  to clear from the blood pool. Maximal hyperaemia will be induced with adenosine infused at 140  $\mu\text{g}/\text{kg}/\text{min}$  for 6 minutes. After 2.5 minutes of adenosine infusion, intravenous  $^{82}\text{Rb}$  infusion and list-mode acquisition will follow the same protocol as for rest. Myocardial blood perfusion quantification (in mL/min/g) will be performed using Cedars-Sinai QGS+QPS 2015.6 software (Cedars-Sinai Medical Center), which is based on a single-compartment model for Rb-82 tracer kinetics.

### Hemodynamics sub-study

1  
2  
3  
4 1 In a substudy, 38 participants randomly selected from the primary study population will perform a graded  
5 2 exercise test until maximal exertion using a supine ergometer with simultaneous invasive hemodynamic  
6 3 measurements. Using local anaesthesia, A Swan-Ganz catheter will be placed into the pulmonary artery  
7 4 via the right internal jugular vein. The following hemodynamic variables will be assessed: pulmonary  
8 5 capillary wedge pressure (PCWP), cardiac output (CO) using thermodilution, central venous pressure (CVP  
9 6 and pulmonary artery pressure (PAP). Following measurements at rest, participants will be transferred to  
10 7 a supine bicycle ergometer, and the measurements will be repeated (leg-raise situation). The participant  
11 8 will be instructed to pedal at 60 rpm and the workload is incrementally increased at steps of 10watts.  
12 9 Measurements during exercise will be obtained at 25 watts and during peak exercise. Blood sampled from  
13 10 the pulmonary vein will be obtained at rest, 25 watts and at peak exercise for analyses of lactate, oxygen  
14 11 saturation and other blood gas variables.  
15 12

### 13 **Echocardiography**

14 The following echocardiographic measurements will be obtained using 3D and 2D imaging: left ventricular  
15 15 ejection fraction (LVEF), left ventricle (LV) end-diastolic and end-systolic diameter, LV mass and left atrial  
16 16 volume. From pulsed-wave Doppler mitral inflow curves, E-wave, A-wave, E-decT and isovolumetric  
17 17 relaxation time will be recorded. Tissue Doppler imaging will be obtained in the apical four-chamber, two-  
18 18 chamber and apical long-axis to evaluate peak systolic (s'), early diastolic (e') and late diastolic (a')  
19 19 velocities during the ejection period. Strain measures of LV (radial, circumferential and longitudinal  
20 20 speckle tracking) will be assessed via 2D echocardiography. The longitudinal tissue velocity of the LV will  
21 21 be assessed by averaging myocardial velocities and displacement of the mitral annular position in the  
22 22 septal, lateral, inferior, posterior and anterior wall of the LV. Diastolic function will be assessed  
23 23 according to EAE/ASE recommendations.  
24 24

### 25 **Cr-51 EDTA**

26 26 The Cr-51 EDTA method will be used to measure glomerular filtration rate (GFR). A single intravenous  
27 27 administration of 3.7MBq of Cr-51 EDTA is given. A venous sample is drawn four hours after  
28 28 administration.  
29 29

## 1 **Accelerometry**

2 A patient-worn accelerometer will be used to assess daily activity level. The patient will wear the  
3 accelerometer continuously for 7 days, except for bathing and swimming.

## 4 **Ambulatory blood pressure**

5 24-hour ambulatory blood pressures will be obtained using a Mobil-O-Graph New Generation 24h ABPM  
6 Classic (Siemens, Germany) set to measure blood pressure every 20 minutes during the daytime and every  
7 hour during the night.

## 8 **Adipose tissue biopsy**

9 Biopsies will be obtained from the abdominal subcutaneous tissue lateral to the umbilicus during a fasting  
10 state using the Bergstrom needle technique. Following dissection, the biopsies are washed and snap  
11 frozen in liquid nitrogen and stored at -80°C. Total mRNA will be extracted from adipose tissue with  
12 commercially available lipid tissue kits to measure the mRNA expression of biomarkers of interest. Protein  
13 expression will be analysed using Western blots. Quantification of inflammatory cells will be performed  
14 according to validated histological procedures. Fibrosis levels will be measured using the Sirius Red stain.

## 15 **Oral Glucose Tolerance Test (OGTT)**

16 The fasting participant will drink a solution of 75g of glucose. Blood will be drawn at time points 0, 30, 60  
17 and 120 minutes, and measurements of plasma glucose, C-peptide and plasma insulin will be taken. Frozen  
18 aliquots for measurement of glucagon will be kept for a later sub-study.

## 19 **Questionnaires**

20 Participants will complete the EQ-5D-5L and the Minnesota Living with Heart Failure questionnaires.

## 21 **Heart rate variability (HRV)**

22 Heart rate variability will be measured using the Vagus™ handheld device. Heart rate response will be  
23 measured at rest, while rising from a lying position to standing upright, during deep in- and expiration and  
24 while performing the Valsalva manoeuvre.

### **Pulse wave analysis (PWA)**

Arterial stiffness will be measured using PWA. The procedure will be performed using a SphygmoCor device (version 7.0, Atcor Medical, Sydney, Australia) at the right radial artery.

### **Body composition**

Body composition will be measured by Dual-energy X-ray absorptiometry (DXA) (Hologic Discovery DXA scanner, Hologic Inc., Bedford, USA) based on fat free, fat and bone mass. Supplementary software provides a novel method for differentiating between visceral and subcutaneous abdominal fat.

### **Urine and blood samples, fasting**

Blood will be drawn in the fasting state, and patients will provide a sample of first morning urine. Standard blood analyses will be performed immediately after sampling. Urine samples for measurement of albumin/creatinine ratio and blood samples for specialized biomarkers will be stored at -80°C until batch analysis can be performed. Blood analysis will include inflammatory biomarkers such as interleukin-6 (IL-6) and tumor necrosis factor- $\alpha$  (TNF- $\alpha$ ), cardiospecific biomarkers such as N-terminal pro-B-type natriuretic peptide (NT-proBNP) and high-sensitivity troponin T (hs-TNT), as well as markers of adipocyte function, including adiponectin and leptin.

## **ENDPOINTS**

### **Primary outcome measurement**

The effect of empagliflozin 25 mg once daily for 13 weeks, compared with placebo on the myocardial flow reserve MFR assessed by  $^{82}\text{Rb}$ -PET

### **Key sub-study measurement**

The effect of empagliflozin compared with placebo on PCWP at a workload of 25 watts

### **Secondary outcome measurements**

The effect of empagliflozin compared with placebo on the following:

- Global left and right heart function
- Renal function by Cr51-EDTA plasma clearance
- Cardiac adipose tissue volume
- PCWP at peak exercise, corrected to body weight

- 1 - Plasma levels of NT-proBNP , MR-proANP, MR-proADM, GAL-3, hsTNT, GDF-15, PIGF, sFlt-1, FFA, adiponectin, leptin, TNF- $\alpha$ , IL-6, MCP-1, MAC-1, COLL-A1, endothelin-1 and FGF-21.
- 2
- 3 - Daily activity levels
- 4
- 5 - Body fat distribution and visceral vs. subcutaneous abdominal fat using DXA
- 6
- 7 - Ambulatory systolic and diastolic blood pressures
- 8
- 9 - Quality of life assessed by the Minnesota Living with Heart Failure and the EuroQol EQ-5D-5L questionnaires
- 10
- 11 - Plasma beta-hydroxy butyrate levels
- 12
- 13 - Urine albumin/creatinine ratio
- 14
- 15 - Adipose tissue fibrosis, mRNA and protein expression of TNF- $\alpha$ , adiponectin, IL-6, COL1-A1, MAC-1, FGF-21, and monocyte chemoattractant protein 1 (MCP1)

## STATISTICAL ANALYSIS

### SAMPLE SIZE

Primary endpoint The

primary endpoint is change in MFR. In a previous study on a comparable population, the SD of measurements of MFR by  $^{82}\text{Rb}$  PET was 0.8. Assuming a clinically relevant difference between the treatment and placebo groups after 6 months of 0.5 in MFR,<sup>27</sup> a sample size of 41:41 (empagliflozin: placebo) can be detected with 80% power and a two-sided significance level of 5%. In all, 92 patients will be randomized to allow for a 10% drop-out rate from the intention-to-treat (ITT) population.

### Sub-study key endpoint

Based on recent experiments in a comparable study population,<sup>28</sup> a difference of 5 mmHg in PCWP during exercise was considered clinically significant. The SD of measurements of PCWP was 5 mmHg; thus, a sample size of 16:16 is required with a power of 80% and a two-sided significance level of 5% to detect a difference of 5 mmHg between groups. In total 38 patients will be included in the sub-study to allow for a 15% drop-out rate.

In the ITT population, none of the randomized participants will be excluded, and the patients will be analysed according to the randomization group. The per-protocol population will consist of all the patients who completed the study with a documented valid baseline and a final-week assessment of the primary objective without any major protocol violations. Analysis of the primary outcome parameter will focus on a change in

1  
2  
3  
4 1 global MBF from the baseline to week 13 between the treatment and control groups. The primary analysis will  
5  
6 2 be based on the ITT population. The primary outcome measure will be analysed using ANCOVA with treatment  
7  
8 3 as a factor and the baseline value as a covariate. The model will include the prespecified covariates age and  
9  
10 4 gender. Missing data will be estimated using the maximum likelihood method. Normally distributed variables  
11  
12 5 will be presented as mean  $\pm$ SD, and non-parametric statistics or appropriate log transformation will be  
13  
14 6 performed if an assumption of normality is not met. After log transformation, the variable will be further tested  
15  
16 7 for normality distribution as indicated. A two-tailed  $p$  value of less than 0.05 will be considered statistically  
17  
18 8 significant.

19 9 Comparisons between the treatment groups will be performed by an unpaired two sample  $t$ -test, Mann-  
20  
21 10 Whitney test or  $\chi^2$  - test as appropriate.

## 22 11 Data management

23 12 Source data will be recorded in the patient record or in case report forms (CRF). The requirements for entering  
24  
25 13 source data directly into the CRF are that the data are obtained directly from the patient either by clinical  
26  
27 14 assessment, interview or point-of-care systems with no printout function and that no more reliable forms of  
28  
29 15 data capture are available. Medical history, height and weight are examples of such data.

30 16 A CRF will be constructed for data capture. Data will be stored in coded form for 5 years according to  
31  
32 17 recommendations from the Danish Data Protection Agency; thereafter, data will be transferred to the Danish  
33  
34 18 Data Archives.

## 39 20 Study medication

40 21 *Name:* Jardiance® (empagliflozin) or a visually identical matching placebo

41  
42 22 *Pharmaceutical Form:* Tablet for oral use

43 23 *Pharmacological Dosage:* Jardiance® or a placebo will be introduced at a dose of 25 mg/day.

44  
45 24 Intake of the tablet can be done at any time during the day; however, it is recommended that the time of  
46  
47 25 intake be consistent from day to day.

48 26 *Side effects:* Very common side effects (> 10%): Hypoglycaemia (when taken in conjunction with insulin or  
49  
50 27 sulfonylureas); Common side effects (1–10%): Skin itching, balanitis, frequent urination, vaginal candidiasis,  
51  
52 28 vulvovaginitis

53 29 *Shipping and packing:* All trial products will be delivered, packed and labelled by Glostrup Pharmacy.

1  
2  
3  
4 1 *Randomization:* Electronic randomization in blocks of 10 will be provided by Glostrup Pharmacy. The  
5 2 randomization list will be stored in a locked cabinet. The patients will be assigned consecutive randomization  
6 3 numbers. Prior to randomization, the patients will be identified by patient numbers which will be assigned  
7 4 consecutively, and patients will retain these numbers following randomization.  
8  
9

### 10 5 Concomitant medication

11 6 Treatment with herbal medicines is not allowed, but otherwise, there are no restrictions on concomitant  
12 7 medication apart from SGLT2-inhibitors. Before enrolment, participants will confirm that they are receiving  
13 8 optimal T2D therapy, and during the trial, T2D and CV risk or disease will be managed according to the best  
14 9 available evidence.  
15  
16  
17  
18

## 19 10 ETHICS AND DISSEMINATION

20 11 The study, which will be conducted in accordance with the latest revision of the Helsinki Declaration, EU  
21 12 directive on GCP and ICH-GCP guidelines, has been approved by the Regional Scientific Ethics Committee, the  
22 13 Danish Medicines Agency and the Danish Data Protection Agency. The study is registered at [clinicaltrials.gov](http://clinicaltrials.gov)  
23 14 and monitored by the GCP unit at Bispebjerg University Hospital. The results of the project will be submitted to  
24 15 international peer-reviewed journals regardless of their outcome, and the data will be made available to the  
25 16 public via EudraCT and [www.clinicaltrials.gov](http://www.clinicaltrials.gov). Furthermore, the results will be presented at conferences as  
26 17 abstracts and posters.  
27  
28  
29  
30  
31  
32  
33

### 34 18 Author affiliations:

35 19 <sup>1</sup>Centre of Endocrinology and Metabolism, Department of Internal Medicine, Copenhagen University Hospitals  
36 20 Herlev/Gentofte, Herlev, Denmark.

37 21 <sup>2</sup>Department of Cardiology, Copenhagen University Hospitals Herlev/Gentofte, Herlev, Denmark.

38 22 <sup>3</sup>Institute of Clinical Medicine, Faculty of Health and Medical Sciences, University of Copenhagen, Copenhagen,  
39 23 Denmark

40 24 <sup>4</sup>Department of Clinical Physiology, Nuclear Medicine & PET and Cluster for Molecular Imaging, Department of  
41 25 Biomedical Sciences, Rigshospitalet and University of Copenhagen, Copenhagen, Denmark.

42 26 <sup>5</sup>Department of Cardiology, The Heart Centre, Rigshospitalet Copenhagen University Hospital, Copenhagen,  
43 27 Denmark

44 28 <sup>6</sup>Department of Clinical Physiology and Nuclear Medicine, Copenhagen University Hospitals Herlev/Gentofte,  
45 29 Herlev, Denmark.

46 30 <sup>7</sup>Department of Endocrinology, Rigshospitalet Copenhagen University Hospital, Copenhagen, Denmark.

47 31 <sup>8</sup>Slagelse Hospital, Slagelse, Denmark; University of Southern Denmark, Odense, Denmark.

48 32 <sup>9</sup>Steno Diabetes Center Copenhagen, Gentofte, Denmark.

49 33 <sup>10</sup>Yale Section of Endocrinology, Yale University School of Medicine, New Haven, CT, USA  
50  
51  
52  
53  
54  
55

### 56 36 Author Contributions:

57  
58  
59  
60

1  
2  
3  
4 1 CK, MS, FG, AK, PH, JF, BZ, SI and MJ conceived the study and participated in its design, planning and  
5 2 coordination. CK, MS, MW, PG, PR, NB and MJ are responsible for the inclusion and examination of patients at  
6 3 Herlev-Gentofte and Rigshospitalet University Hospital. AK and PH are responsible for the <sup>82</sup>Rb-PET  
7 4 measurements and FG, EW for the hemodynamics experiments at Rigshospitalet University Hospital.  
8  
9

#### 10 5 **Funding:**

11  
12 6 This work is supported by the department of Internal Medicine at Herlev Hospital; the Research council of  
13 7 Herlev Hospital; The Danish Heart Foundation, grant number 16-R107-A6697; The Hartmann Foundation, The  
14 8 Toyota Foundation and by a Steno Collaborative Grant 2018.  
15

16  
17 9 ClinicalTrials.gov Identifier: NCT03151343, EudraCT number: 2016-003743-10  
18

#### 19 10 **Competing interests:**

20 11 PR has received consultancy and/or speaking fees (to his institution) from AbbVie, Astellas, AstraZeneca, Bayer,  
21 12 Boehringer Ingelheim, Bristol-Myers Squibb, Eli Lilly, MSD, Novo Nordisk and Sanofi Aventis and has received  
22 13 institutional research grants from AbbVie, AstraZeneca and Novo Nordisk.  
23  
24  
25  
26

## 27 15 REFERENCES

- 28  
29 16 1. Turner R. Intensive blood-glucose control with sulphonylureas or insulin compared with conventional  
30 17 treatment and risk of complications in patients with type 2 diabetes (UKPDS 33). *Lancet*.  
31 18 1998;352(9131):837-853. doi:10.1016/S0140-6736(98)07019-6
  - 32  
33 19 2. Scirica BM, Bhatt DL, Braunwald E, et al. Saxagliptin and Cardiovascular Outcomes in Patients with Type  
34 20 2 Diabetes Mellitus. *N Engl J Med*. 2013;369(14):1317-1326. doi:10.1056/NEJMoa1307684
  - 35  
36 21 3. Green JB, Bethel MA, Armstrong PW, et al. Effect of Sitagliptin on Cardiovascular Outcomes in Type 2  
37 22 Diabetes. *N Engl J Med*. 2015;373(3):232-242. doi:10.1056/NEJMoa1501352
  - 38  
39 23 4. Pfeffer MA, Claggett B, Diaz R, et al. Lixisenatide in Patients with Type 2 Diabetes and Acute Coronary  
40 24 Syndrome. *N Engl J Med*. 2015;373(23):2247-2257. doi:10.1056/NEJMoa1509225
  - 41  
42 25 5. White WB, Cannon CP, Heller SR, et al. Alogliptin after Acute Coronary Syndrome in Patients with Type 2  
43 26 Diabetes. *N Engl J Med*. 2013;369(14):1327-1335. doi:10.1056/NEJMoa1305889
  - 44  
45 27 6. Zinman B, Wanner C, Lachin JM, et al. Empagliflozin, Cardiovascular Outcomes, and Mortality in Type 2  
46 28 Diabetes. *N Engl J Med*. 2015;373(22):2117-2128. doi:10.1056/NEJMoa1504720
  - 47  
48 29 7. Guthrie R. Canagliflozin and cardiovascular and renal events in type 2 diabetes. *Postgrad Med*.  
49 30 2018;130(2):149-153. doi:10.1080/00325481.2018.1423852
  - 50  
51 31 8. Wiviott SD, Raz I, Bonaca MP, et al. Dapagliflozin and Cardiovascular Outcomes in Type 2 Diabetes. *N*  
52 32 *Engl J Med*. 2018;NEJMoa1812389. doi:10.1056/NEJMoa1812389
- 53  
54  
55  
56  
57  
58  
59  
60



- 1  
2  
3  
4 1 9. Cefalu WT, Kaul S, Gerstein HC, et al. Cardiovascular outcomes trials in type 2 diabetes: Where Do We  
5 2 Go From Here? Ref lections From a Diabetes Care Editors' Expert Forum. *Diabetes Care*. 2018;41(1):14-  
6 3 31. doi:10.2337/dci17-0057  
7  
8 4 10. Fitchett D, the E-REGO trial investigators, Zinman B, et al. Heart failure outcomes with empagliflozin in  
9 5 patients with type 2 diabetes at high cardiovascular risk: results of the EMPA-REG OUTCOME® trial. *Eur*  
10 6 *Heart J*. 2016;37(19):1526-1534. doi:10.1093/eurheartj/ehv728  
11  
12 7 11. Abdul-Ghani M, Del Prato S, Chilton R, DeFronzo RA. SGLT2 Inhibitors and Cardiovascular Risk: Lessons  
13 8 Learned From the EMPA-REG OUTCOME Study. *Diabetes Care*. 2016;39(5):717-725. doi:10.2337/dc16-  
14 9 0041  
15  
16 10 12. Avogaro A, Albiero M, Menegazzo L, De Kreutzenberg S, Fadini GP. Endothelial dysfunction in diabetes:  
17 11 The role of reparatory mechanisms. *Diabetes Care*. 2011;34(SUPPL. 2):285-290. doi:10.2337/dc11-s239  
18  
19 12 13. Srivaratharajah K, Coutinho T, Dekemp R, et al. Reduced myocardial flow in heart failure patients with  
20 13 preserved ejection fraction. *Circ Hear Fail*. 2016;9(7). doi:10.1161/CIRCHEARTFAILURE.115.002562  
21  
22 14 14. Murthy VL, Naya M, Foster CR, et al. Association between coronary vascular dysfunction and cardiac  
23 15 mortality in patients with and without diabetes mellitus. *Circulation*. 2012;126(15):1858-1868.  
24 16 doi:10.1161/CIRCULATIONAHA.112.120402  
25  
26 17 15. Cortigiani L, Rigo F, Gherardi S, et al. Additional Prognostic Value of Coronary Flow Reserve in Diabetic  
27 18 and Nondiabetic Patients With Negative Diprydamole Stress Echocardiography by Wall Motion Criteria.  
28 19 *J Am Coll Cardiol*. 2007;50(14):1354-1361. doi:10.1016/j.jacc.2007.06.027  
29  
30 20 16. Lin B, Koibuchi N, Hasegawa Y, et al. Glycemic control with empagliflozin, a novel selective SGLT2  
31 21 inhibitor, ameliorates cardiovascular injury and cognitive dysfunction in obese and type 2 diabetic mice.  
32 22 *Cardiovasc Diabetol*. 2014;13(1). doi:10.1186/s12933-014-0148-1  
33  
34 23 17. Oelze M, Kröller-Schön S, Welschof P, et al. The sodium-glucose co-transporter 2 inhibitor empagliflozin  
35 24 improves diabetes-induced vascular dysfunction in the streptozotocin diabetes rat model by interfering  
36 25 with oxidative stress and glucotoxicity. *PLoS One*. 2014;9(11):e112394.  
37 26 doi:10.1371/journal.pone.0112394  
38  
39 27 18. Sattar N, McLaren J, Kristensen SL, Preiss D, McMurray JJ. SGLT2 Inhibition and cardiovascular events:  
40 28 why did EMPA-REG Outcomes surprise and what were the likely mechanisms? *Diabetologia*. 2016:1-7.  
41 29 doi:10.1007/s00125-016-3956-x  
42  
43 30 19. Emil W, David K, A. BB, et al. Resting and exercise haemodynamics in relation to six-minute walk test in  
44 31 patients with heart failure and preserved ejection fraction. *Eur J Heart Fail*. 2017;20(4):715-722.  
45 32 doi:10.1002/ejhf.976  
46  
47 33 20. Sharma S, Adroque J V, Golfman L, et al. Intramyocardial lipid accumulation in the failing human heart  
48 34 resembles the lipotoxic rat heart. *FASEB J*. 2004;18(14):1692-1700. doi:10.1096/fj.04-2263com  
49  
50 35 21. Ferrannini E, Muscelli E, Frascerra S, et al. Metabolic response to sodium-glucose cotransporter 2  
51 36 inhibition in type 2 diabetic patients. *J Clin Invest*. 2014;124(2):499-508. doi:10.1172/JCI72227.uptake  
52  
53  
54  
55  
56  
57  
58  
59  
60

1  
2  
3  
4  
5  
6  
7  
8  
9  
10  
11  
12  
13  
14  
15  
16  
17  
18  
19  
20  
21  
22  
23  
24  
25  
26  
27  
28  
29  
30  
31  
32  
33  
34  
35  
36  
37  
38  
39  
40  
41  
42  
43  
44  
45  
46  
47  
48  
49  
50  
51  
52  
53  
54  
55  
56  
57  
58  
59  
60

- 1 22. Ferrannini E. Sodium-Glucose Co-transporters and Their Inhibition: Clinical Physiology. *Cell Metab.* 2017;26(1):27-38. doi:10.1016/j.cmet.2017.04.011
- 2
- 3
- 4 23. Ferrannini E, Mark M, Mayoux E. CV Protection in the EMPA-REG OUTCOME Trial: A “Thrifty Substrate” Hypothesis. *Diabetes Care.* 2016;(March):dc160330. doi:10.2337/dc16-0330
- 5
- 6
- 7 24. Verma S, Rawat S, Ho KL, et al. Empagliflozin Increases Cardiac Energy Production in Diabetes. *JACC Basic to Transl Sci.* 2018. doi:10.1016/j.jacbts.2018.07.006
- 8
- 9
- 10 25. Ridker PM. Clinician’s Guide to Reducing Inflammation to Reduce Atherothrombotic Risk. *J Am Coll Cardiol.* 2018;72(25):3320-3331. doi:10.1016/j.jacc.2018.06.082
- 11
- 12
- 13 26. Heise T, Seewaldt-Becker E, Macha S, et al. Safety, tolerability, pharmacokinetics and pharmacodynamics following 4 weeks’ treatment with empagliflozin once daily in patients with type 2 diabetes. *Diabetes, Obes Metab.* 2013;15(7):613-621. doi:10.1111/dom.12073
- 14
- 15
- 16 27. von Scholten BJ, Hasbak P, Christensen TE, et al. Cardiac 82Rb PET/CT for fast and non-invasive assessment of microvascular function and structure in asymptomatic patients with type 2 diabetes. *Diabetologia.* 2016;59(2):371-378. doi:10.1007/s00125-015-3799-x
- 17
- 18
- 19 28. Andersen MJ, Ersbøll M, Axelsson A, et al. Sildenafil and diastolic dysfunction after acute myocardial infarction in patients with preserved ejection fraction: The sildenafil and diastolic dysfunction after acute myocardial infarction (SIDAMI) trial. *Circulation.* 2013;127(11):1200-1208. doi:10.1161/CIRCULATIONAHA.112.000056
- 20
- 21
- 22
- 23
- 24
- 25
- 26
- 27
- 28
- 29
- 30
- 31
- 32
- 33
- 34
- 35
- 36
- 37
- 38
- 39
- 40
- 41
- 42
- 43
- 44
- 45
- 46
- 47
- 48
- 49
- 50
- 51
- 52
- 53
- 54
- 55
- 56
- 57
- 58
- 59
- 60

**Table 1 Inclusion and exclusion criteria****Inclusion criteria**

- ▶ T2D (WHO criteria), diagnosed at least 3 months before screening, and with no upper limit to duration
- ▶ For patients on background therapy: No change in anti-diabetic therapy within 30 days prior to baseline
- ▶ Hba1c of  $\geq 48$  mmol/L and  $\leq 86$  mmol/L at screening for patients on background therapy or Hba1c of  $\geq 48$  mmol/L and  $\leq 75$  mmol/L at screening for drug-naïve patients
- ▶ Age  $\geq 18$  years
- ▶ BMI  $\leq 45$  kg/m
- ▶ Negative pregnancy test (fertile women). Fertile women must use safe contraceptives (spiral, hormonal contraceptives) for the duration of the study
- ▶ Able to understand the written patient information and to give informed consent
- ▶ High cardiovascular risk, defined as at least one of the following:
  - ACR  $\geq 30$  mg/g
  - NT-proBNP  $\geq 70$  pg/mL
  - Confirmed history of myocardial infarction  $> 2$  months prior to baseline
  - Heart failure according to Framingham Heart Failure Criteria
  - Discharged from hospital with a documented diagnosis of UA  $\leq 12$  months prior to baseline
  - Evidence of coronary artery disease by CAG in one or more major coronary arteries OR at least one of the following: a positive noninvasive stress test, or a positive stress echocardiography showing regional systolic wall motion abnormalities, or a positive scintigraphic test showing stress-induced ischemia
  - History of ischemic or hemorrhagic stroke  $> 2$  months prior to informed consent
  - Presence of peripheral artery disease such as: previous limb angioplasty, stenting or bypass surgery; or previous limb or foot amputation due to circulatory insufficiency; or angiographic evidence of significant ( $> 50\%$ ) peripheral artery stenosis in at least one limb; or evidence from a non-invasive measurement of significant ( $>50\%$  or as reported as hemodynamically significant) peripheral artery stenosis in at least one limb; or ankle brachial index of  $< 0.9$

**Exclusion criteria**

- ▶ Allergic to the study medication
- ▶ Treatment with SGLT-2 inhibitor within 1 month prior to baseline
- ▶ Impaired kidney function, eGFR  $\leq 30$  ml/min
- ▶ Severe liver insufficiency (Child-Pugh class C)
- ▶ ECG showing malign ventricular arrhythmia or prolonged QT-interval ( $>500$ ms)
- ▶ Untreated clinically significant heart valve disease
- ▶ Planned cardiac surgery or angioplasty within 3 months.
- ▶ Myocardial infarction (MI)  $\leq 30$  days prior to baseline
- ▶ Percutaneous coronary intervention (PCI)  $\leq 4$  weeks prior to baseline
- ▶ History of coronary artery bypass graft (CABG)  $\leq 8$  weeks prior to enrollment
- ▶ Prior history of heart transplantation
- ▶ Unstable angina, known severe left main coronary artery stenosis, severe heart failure, uncontrolled arrhythmias, symptomatic hypotension or severe hypertension (systolic blood pressure  $< 90$  or  $> 180$  mmHg, respectively), sick sinus syndrome or  $>$  first degree atrioventricular block in the absence of a functioning pacemaker
- ▶ Requirement of emergent cardiac medical intervention or catheterization
- ▶ Treatment with theophylline, or medications containing theophylline
- ▶ History of known or suspected bronchoconstrictive or bronchospastic lung disease (e.g., asthma)
- ▶ Not using safe contraception
- ▶ Pregnancy or desire hereof or breastfeeding.

**Table 2 Overview of study visits**

| Visit                                    | V <sub>0</sub> | V <sub>1</sub> | T <sub>1</sub> | V <sub>2</sub> | T <sub>2</sub> | V <sub>3</sub> |
|------------------------------------------|----------------|----------------|----------------|----------------|----------------|----------------|
| Time, weeks                              | -4±1           | 0±1            | 2±1            | 4±1            | 8±1            | 12±1           |
| Inclusion/exclusion criteria             | X              | X              |                |                |                |                |
| Medical history                          | X              |                |                |                |                |                |
| Informed consent                         | X              |                |                |                |                |                |
| Blood samples, non-fasting               | X              |                |                | X              |                |                |
| Physical examination                     | X              |                |                | X              |                |                |
| Adverse events                           |                | X              | X              | X              | X              | X              |
| <b>Endpoints, Main study</b>             |                |                |                |                |                |                |
| <sup>82</sup> Rb -PET (primary endpoint) |                | X              |                |                |                | X              |
| Echocardiography                         |                | X              |                |                |                | X              |
| Ambulatory BP                            |                | X              |                |                |                | X              |
| Adipose tissue biopsy                    |                | X              |                |                |                | X              |
| Oral glucose tolerance test              |                | X              |                |                |                | X              |
| Questionnaires                           |                | X              |                |                |                | X              |
| HRV                                      |                | X              |                |                |                | X              |
| PWA                                      |                | X              |                |                |                | X              |
| <sup>51</sup> Cr EDTA clearance          |                | X              |                |                |                | X              |
| Body composition (DEXA)                  |                | X              |                |                |                | X              |
| Blood samples, fasting                   |                | X              |                |                |                | X              |
| Urine samples, fasting                   |                | X              |                |                |                | X              |
| <b>Endpoints, substudy</b>               |                |                |                |                |                |                |
| Hemodynamics (key secondary endpoint)    |                | X              |                |                |                | X              |
| Accelerometer                            |                | X              |                |                |                | X              |

1

2

1  
2  
3  
4  
5  
6  
7  
8  
9  
10  
11  
12  
13  
14  
15  
16  
17  
18  
19  
20  
21  
22  
23  
24  
25  
26  
27  
28  
29  
30  
31  
32  
33  
34  
35  
36  
37  
38  
39  
40  
41  
42  
43  
44  
45  
46  
47  
48  
49  
50  
51  
52  
53  
54  
55  
56  
57  
58  
59  
60

1

For peer review only

Figure 1  
Time-line of the study visits

1  
2  
3  
4  
5  
6  
7 Week 0±1  
8  
9  
10  
11 Week 2±1  
12  
13  
14  
15 Week 4±1  
16  
17  
18  
19 Week 8±1  
20  
21  
22  
23  
24 Week 12±1  
25

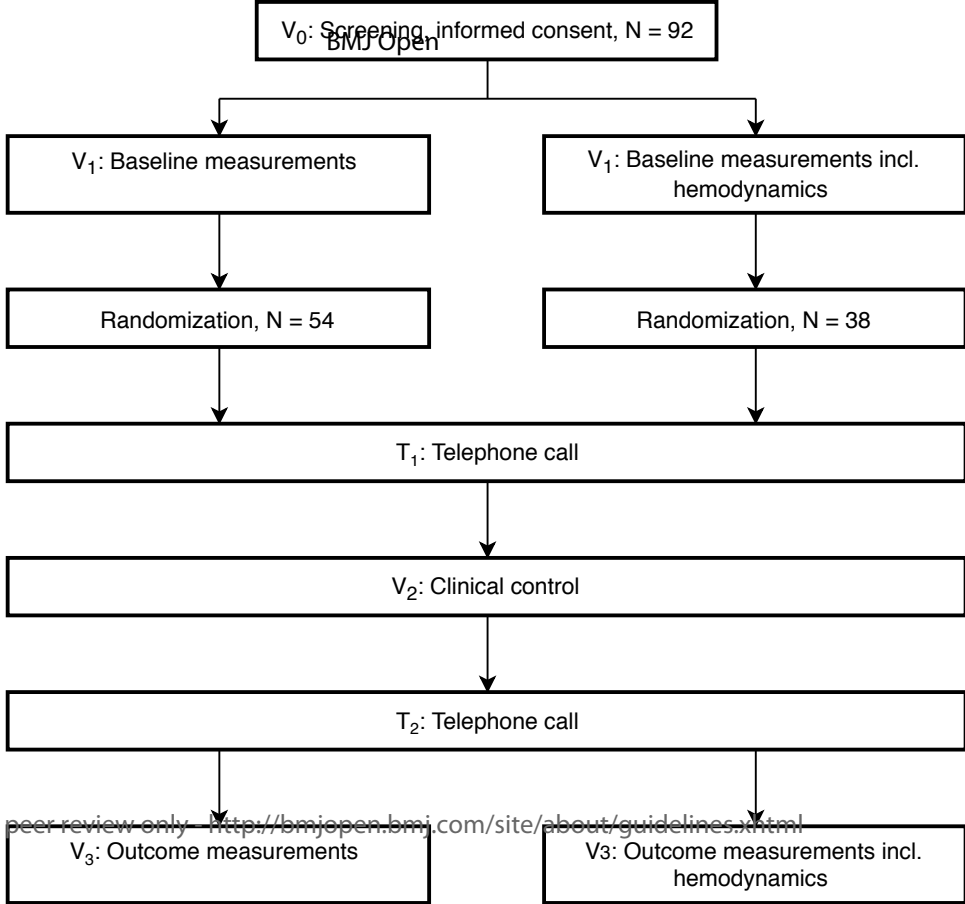

# Reporting checklist for protocol of a clinical trial.

Based on the SPIRIT guidelines.

## Instructions to authors

Complete this checklist by entering the page numbers from your manuscript where readers will find each of the items listed below.

Your article may not currently address all the items on the checklist. Please modify your text to include the missing information. If you are certain that an item does not apply, please write "n/a" and provide a short explanation.

Upload your completed checklist as an extra file when you submit to a journal.

In your methods section, say that you used the SPIRIT reporting guidelines, and cite them as:

Chan A-W, Tetzlaff JM, Altman DG, Laupacis A, Gøtzsche PC, Krleža-Jerić K, Hróbjartsson A, Mann H, Dickersin K, Berlin J, Doré C, Parulekar W, Summerskill W, Groves T, Schulz K, Sox H, Rockhold FW, Rennie D, Moher D. SPIRIT 2013 Statement: Defining standard protocol items for clinical trials. *Ann Intern Med.* 2013;158(3):200-207

|                                             |     | Reporting Item                                                                                               | Page Number   |
|---------------------------------------------|-----|--------------------------------------------------------------------------------------------------------------|---------------|
| Title                                       | #1  | Descriptive title identifying the study design, population, interventions, and, if applicable, trial acronym | 1             |
| Trial registration                          | #2a | Trial identifier and registry name. If not yet registered, name of intended registry                         | 2             |
| Trial registration: data set                | #2b | All items from the World Health Organization Trial Registration Data Set                                     | See note<br>1 |
| Protocol version                            | #3  | Date and version identifier                                                                                  | 2             |
| Funding                                     | #4  | Sources and types of financial, material, and other support                                                  | 11            |
| Roles and responsibilities: contributorship | #5a | Names, affiliations, and roles of protocol contributors                                                      | 1,11          |
| Roles and responsibilities:                 | #5b | Name and contact information for the trial sponsor                                                           | See note<br>2 |

|    |                      |      |                                                                          |          |
|----|----------------------|------|--------------------------------------------------------------------------|----------|
| 1  | sponsor contact      |      |                                                                          |          |
| 2  | information          |      |                                                                          |          |
| 3  |                      |      |                                                                          |          |
| 4  | Roles and            | #5c  | Role of study sponsor and funders, if any, in study design;              | See note |
| 5  | responsibilities:    |      | collection, management, analysis, and interpretation of data; writing    | 3        |
| 6  | sponsor and funder   |      | of the report; and the decision to submit the report for publication,    |          |
| 7  |                      |      | including whether they will have ultimate authority over any of these    |          |
| 8  |                      |      | activities                                                               |          |
| 9  |                      |      |                                                                          |          |
| 10 |                      |      |                                                                          |          |
| 11 |                      |      |                                                                          |          |
| 12 | Roles and            | #5d  | Composition, roles, and responsibilities of the coordinating centre,     | n/a      |
| 13 | responsibilities:    |      | steering committee, endpoint adjudication committee, data                |          |
| 14 | committees           |      | management team, and other individuals or groups overseeing the          |          |
| 15 |                      |      | trial, if applicable (see Item 21a for data monitoring committee)        |          |
| 16 |                      |      |                                                                          |          |
| 17 |                      |      |                                                                          |          |
| 18 |                      |      |                                                                          |          |
| 19 | Background and       | #6a  | Description of research question and justification for undertaking the   | 2-4      |
| 20 | rationale            |      | trial, including summary of relevant studies (published and              |          |
| 21 |                      |      | unpublished) examining benefits and harms for each intervention          |          |
| 22 |                      |      |                                                                          |          |
| 23 |                      |      |                                                                          |          |
| 24 | Background and       | #6b  | Explanation for choice of comparators                                    | See note |
| 25 | rationale: choice of |      |                                                                          | 4        |
| 26 | comparators          |      |                                                                          |          |
| 27 |                      |      |                                                                          |          |
| 28 |                      |      |                                                                          |          |
| 29 | Objectives           | #7   | Specific objectives or hypotheses                                        | 4        |
| 30 |                      |      |                                                                          |          |
| 31 |                      |      |                                                                          |          |
| 32 | Trial design         | #8   | Description of trial design including type of trial (eg, parallel group, | 4        |
| 33 |                      |      | crossover, factorial, single group), allocation ratio, and framework     |          |
| 34 |                      |      | (eg, superiority, equivalence, non-inferiority, exploratory)             |          |
| 35 |                      |      |                                                                          |          |
| 36 |                      |      |                                                                          |          |
| 37 | Study setting        | #9   | Description of study settings (eg, community clinic, academic            | 4        |
| 38 |                      |      | hospital) and list of countries where data will be collected. Reference  |          |
| 39 |                      |      | to where list of study sites can be obtained                             |          |
| 40 |                      |      |                                                                          |          |
| 41 |                      |      |                                                                          |          |
| 42 | Eligibility criteria | #10  | Inclusion and exclusion criteria for participants. If applicable,        | 14       |
| 43 |                      |      | eligibility criteria for study centres and individuals who will perform  |          |
| 44 |                      |      | the interventions (eg, surgeons, psychotherapists)                       |          |
| 45 |                      |      |                                                                          |          |
| 46 |                      |      |                                                                          |          |
| 47 |                      |      |                                                                          |          |
| 48 | Interventions:       | #11a | Interventions for each group with sufficient detail to allow             | 4-5      |
| 49 | description          |      | replication, including how and when they will be administered            |          |
| 50 |                      |      |                                                                          |          |
| 51 |                      |      |                                                                          |          |
| 52 | Interventions:       | #11b | Criteria for discontinuing or modifying allocated interventions for a    | See note |
| 53 | modifications        |      | given trial participant (eg, drug dose change in response to harms,      | 5        |
| 54 |                      |      | participant request, or improving / worsening disease)                   |          |
| 55 |                      |      |                                                                          |          |
| 56 |                      |      |                                                                          |          |
| 57 | Interventions:       | #11c | Strategies to improve adherence to intervention protocols, and any       | See note |
| 58 | adherence            |      | procedures for monitoring adherence (eg, drug tablet return;             | 6        |
| 59 |                      |      |                                                                          |          |
| 60 |                      |      |                                                                          |          |



|    |                      |                   |                                                                        |
|----|----------------------|-------------------|------------------------------------------------------------------------|
|    |                      | laboratory tests) |                                                                        |
| 1  |                      |                   |                                                                        |
| 2  |                      |                   |                                                                        |
| 3  | Interventions:       | #11d              | Relevant concomitant care and interventions that are permitted or      |
| 4  | concomitant care     |                   | prohibited during the trial                                            |
| 5  |                      |                   | 10                                                                     |
| 6  | Outcomes             | #12               | Primary, secondary, and other outcomes, including the specific         |
| 7  |                      |                   | measurement variable (eg, systolic blood pressure), analysis metric    |
| 8  |                      |                   | (eg, change from baseline, final value, time to event), method of      |
| 9  |                      |                   | aggregation (eg, median, proportion), and time point for each          |
| 10 |                      |                   | outcome. Explanation of the clinical relevance of chosen efficacy      |
| 11 |                      |                   | and harm outcomes is strongly recommended                              |
| 12 |                      |                   | 8                                                                      |
| 13 |                      |                   |                                                                        |
| 14 |                      |                   |                                                                        |
| 15 |                      |                   |                                                                        |
| 16 | Participant timeline | #13               | Time schedule of enrolment, interventions (including any run-ins       |
| 17 |                      |                   | and washouts), assessments, and visits for participants. A schematic   |
| 18 |                      |                   | diagram is highly recommended (see Figure)                             |
| 19 |                      |                   | 15                                                                     |
| 20 |                      |                   |                                                                        |
| 21 | Sample size          | #14               | Estimated number of participants needed to achieve study objectives    |
| 22 |                      |                   | and how it was determined, including clinical and statistical          |
| 23 |                      |                   | assumptions supporting any sample size calculations                    |
| 24 |                      |                   | 9                                                                      |
| 25 |                      |                   |                                                                        |
| 26 | Recruitment          | #15               | Strategies for achieving adequate participant enrolment to reach       |
| 27 |                      |                   | target sample size                                                     |
| 28 |                      |                   | 4                                                                      |
| 29 |                      |                   |                                                                        |
| 30 | Allocation: sequence | #16a              | Method of generating the allocation sequence (eg, computer-            |
| 31 | generation           |                   | generated random numbers), and list of any factors for stratification. |
| 32 |                      |                   | To reduce predictability of a random sequence, details of any          |
| 33 |                      |                   | planned restriction (eg, blocking) should be provided in a separate    |
| 34 |                      |                   | document that is unavailable to those who enrol participants or        |
| 35 |                      |                   | assign interventions                                                   |
| 36 |                      |                   | 4-5                                                                    |
| 37 |                      |                   |                                                                        |
| 38 |                      |                   |                                                                        |
| 39 |                      |                   |                                                                        |
| 40 | Allocation           | #16b              | Mechanism of implementing the allocation sequence (eg, central         |
| 41 | concealment          |                   | telephone; sequentially numbered, opaque, sealed envelopes),           |
| 42 | mechanism            |                   | describing any steps to conceal the sequence until interventions are   |
| 43 |                      |                   | assigned                                                               |
| 44 |                      |                   | 4-5                                                                    |
| 45 |                      |                   |                                                                        |
| 46 |                      |                   |                                                                        |
| 47 | Allocation:          | #16c              | Who will generate the allocation sequence, who will enrol              |
| 48 | implementation       |                   | participants, and who will assign participants to interventions        |
| 49 |                      |                   | 4-5, 11                                                                |
| 50 |                      |                   |                                                                        |
| 51 | Blinding (masking)   | #17a              | Who will be blinded after assignment to interventions (eg, trial       |
| 52 |                      |                   | participants, care providers, outcome assessors, data analysts), and   |
| 53 |                      |                   | how                                                                    |
| 54 |                      |                   | 4                                                                      |
| 55 |                      |                   |                                                                        |
| 56 | Blinding (masking):  | #17b              | If blinded, circumstances under which unblinding is permissible, and   |
| 57 | emergency            |                   | procedure for revealing a participant's allocated intervention during  |
| 58 |                      |                   | 4-5                                                                    |
| 59 |                      |                   |                                                                        |
| 60 |                      |                   |                                                                        |

|    |                        |      |                                                                         |          |
|----|------------------------|------|-------------------------------------------------------------------------|----------|
| 1  | unblinding             |      | the trial                                                               |          |
| 2  |                        |      |                                                                         |          |
| 3  | Data collection plan   | #18a | Plans for assessment and collection of outcome, baseline, and other     | 9        |
| 4  |                        |      | trial data, including any related processes to promote data quality     |          |
| 5  |                        |      | (eg, duplicate measurements, training of assessors) and a description   |          |
| 6  |                        |      | of study instruments (eg, questionnaires, laboratory tests) along with  |          |
| 7  |                        |      | their reliability and validity, if known. Reference to where data       |          |
| 8  |                        |      | collection forms can be found, if not in the protocol                   |          |
| 9  |                        |      |                                                                         |          |
| 10 |                        |      |                                                                         |          |
| 11 |                        |      |                                                                         |          |
| 12 | Data collection plan:  | #18b | Plans to promote participant retention and complete follow-up,          | See note |
| 13 | retention              |      | including list of any outcome data to be collected for participants     | 7        |
| 14 |                        |      | who discontinue or deviate from intervention protocols                  |          |
| 15 |                        |      |                                                                         |          |
| 16 |                        |      |                                                                         |          |
| 17 | Data management        | #19  | Plans for data entry, coding, security, and storage, including any      | 9        |
| 18 |                        |      | related processes to promote data quality (eg, double data entry;       |          |
| 19 |                        |      | range checks for data values). Reference to where details of data       |          |
| 20 |                        |      | management procedures can be found, if not in the protocol              |          |
| 21 |                        |      |                                                                         |          |
| 22 |                        |      |                                                                         |          |
| 23 |                        |      |                                                                         |          |
| 24 | Statistics: outcomes   | #20a | Statistical methods for analysing primary and secondary outcomes.       | 9        |
| 25 |                        |      | Reference to where other details of the statistical analysis plan can   |          |
| 26 |                        |      | be found, if not in the protocol                                        |          |
| 27 |                        |      |                                                                         |          |
| 28 |                        |      |                                                                         |          |
| 29 |                        |      |                                                                         |          |
| 30 | Statistics: additional | #20b | Methods for any additional analyses (eg, subgroup and adjusted          | 9        |
| 31 | analyses               |      | analyses)                                                               |          |
| 32 |                        |      |                                                                         |          |
| 33 |                        |      |                                                                         |          |
| 34 | Statistics: analysis   | #20c | Definition of analysis population relating to protocol non-adherence    | 9        |
| 35 | population and         |      | (eg, as randomised analysis), and any statistical methods to handle     |          |
| 36 | missing data           |      | missing data (eg, multiple imputation)                                  |          |
| 37 |                        |      |                                                                         |          |
| 38 |                        |      |                                                                         |          |
| 39 | Data monitoring:       | #21a | Composition of data monitoring committee (DMC); summary of its          | See note |
| 40 | formal committee       |      | role and reporting structure; statement of whether it is independent    | 8        |
| 41 |                        |      | from the sponsor and competing interests; and reference to where        |          |
| 42 |                        |      | further details about its charter can be found, if not in the protocol. |          |
| 43 |                        |      | Alternatively, an explanation of why a DMC is not needed                |          |
| 44 |                        |      |                                                                         |          |
| 45 |                        |      |                                                                         |          |
| 46 |                        |      |                                                                         |          |
| 47 | Data monitoring:       | #21b | Description of any interim analyses and stopping guidelines,            | n/a      |
| 48 | interim analysis       |      | including who will have access to these interim results and make the    |          |
| 49 |                        |      | final decision to terminate the trial                                   |          |
| 50 |                        |      |                                                                         |          |
| 51 |                        |      |                                                                         |          |
| 52 |                        |      |                                                                         |          |
| 53 | Harms                  | #22  | Plans for collecting, assessing, reporting, and managing solicited and  | 5        |
| 54 |                        |      | spontaneously reported adverse events and other unintended effects      |          |
| 55 |                        |      | of trial interventions or trial conduct                                 |          |
| 56 |                        |      |                                                                         |          |
| 57 |                        |      |                                                                         |          |
| 58 | Auditing               | #23  | Frequency and procedures for auditing trial conduct, if any, and        | 10       |
| 59 |                        |      |                                                                         |          |
| 60 |                        |      |                                                                         |          |

|    |                                             |                                                                                                                                                                                                                                                                                          |             |
|----|---------------------------------------------|------------------------------------------------------------------------------------------------------------------------------------------------------------------------------------------------------------------------------------------------------------------------------------------|-------------|
|    |                                             | whether the process will be independent from investigators and the sponsor                                                                                                                                                                                                               |             |
| 1  |                                             |                                                                                                                                                                                                                                                                                          |             |
| 2  |                                             |                                                                                                                                                                                                                                                                                          |             |
| 3  |                                             |                                                                                                                                                                                                                                                                                          |             |
| 4  | Research ethics approval                    | #24 Plans for seeking research ethics committee / institutional review board (REC / IRB) approval                                                                                                                                                                                        | See note 9  |
| 5  |                                             |                                                                                                                                                                                                                                                                                          |             |
| 6  |                                             |                                                                                                                                                                                                                                                                                          |             |
| 7  |                                             |                                                                                                                                                                                                                                                                                          |             |
| 8  | Protocol amendments                         | #25 Plans for communicating important protocol modifications (eg, changes to eligibility criteria, outcomes, analyses) to relevant parties (eg, investigators, REC / IRBs, trial participants, trial registries, journals, regulators)                                                   | See note 10 |
| 9  |                                             |                                                                                                                                                                                                                                                                                          |             |
| 10 |                                             |                                                                                                                                                                                                                                                                                          |             |
| 11 |                                             |                                                                                                                                                                                                                                                                                          |             |
| 12 |                                             |                                                                                                                                                                                                                                                                                          |             |
| 13 |                                             |                                                                                                                                                                                                                                                                                          |             |
| 14 | Consent or assent                           | #26a Who will obtain informed consent or assent from potential trial participants or authorised surrogates, and how (see Item 32)                                                                                                                                                        | 4,5,11      |
| 15 |                                             |                                                                                                                                                                                                                                                                                          |             |
| 16 |                                             |                                                                                                                                                                                                                                                                                          |             |
| 17 |                                             |                                                                                                                                                                                                                                                                                          |             |
| 18 | Consent or assent: ancillary studies        | #26b Additional consent provisions for collection and use of participant data and biological specimens in ancillary studies, if applicable                                                                                                                                               | n/a         |
| 19 |                                             |                                                                                                                                                                                                                                                                                          |             |
| 20 |                                             |                                                                                                                                                                                                                                                                                          |             |
| 21 |                                             |                                                                                                                                                                                                                                                                                          |             |
| 22 | Confidentiality                             | #27 How personal information about potential and enrolled participants will be collected, shared, and maintained in order to protect confidentiality before, during, and after the trial                                                                                                 | 9           |
| 23 |                                             |                                                                                                                                                                                                                                                                                          |             |
| 24 |                                             |                                                                                                                                                                                                                                                                                          |             |
| 25 |                                             |                                                                                                                                                                                                                                                                                          |             |
| 26 |                                             |                                                                                                                                                                                                                                                                                          |             |
| 27 | Declaration of interests                    | #28 Financial and other competing interests for principal investigators for the overall trial and each study site                                                                                                                                                                        | 11          |
| 28 |                                             |                                                                                                                                                                                                                                                                                          |             |
| 29 |                                             |                                                                                                                                                                                                                                                                                          |             |
| 30 |                                             |                                                                                                                                                                                                                                                                                          |             |
| 31 | Data access                                 | #29 Statement of who will have access to the final trial dataset, and disclosure of contractual agreements that limit such access for investigators                                                                                                                                      | See note 11 |
| 32 |                                             |                                                                                                                                                                                                                                                                                          |             |
| 33 |                                             |                                                                                                                                                                                                                                                                                          |             |
| 34 |                                             |                                                                                                                                                                                                                                                                                          |             |
| 35 |                                             |                                                                                                                                                                                                                                                                                          |             |
| 36 | Ancillary and post trial care               | #30 Provisions, if any, for ancillary and post-trial care, and for compensation to those who suffer harm from trial participation                                                                                                                                                        | n/a (none)  |
| 37 |                                             |                                                                                                                                                                                                                                                                                          |             |
| 38 |                                             |                                                                                                                                                                                                                                                                                          |             |
| 39 |                                             |                                                                                                                                                                                                                                                                                          |             |
| 40 | Dissemination policy: trial results         | #31a Plans for investigators and sponsor to communicate trial results to participants, healthcare professionals, the public, and other relevant groups (eg, via publication, reporting in results databases, or other data sharing arrangements), including any publication restrictions | 10          |
| 41 |                                             |                                                                                                                                                                                                                                                                                          |             |
| 42 |                                             |                                                                                                                                                                                                                                                                                          |             |
| 43 |                                             |                                                                                                                                                                                                                                                                                          |             |
| 44 |                                             |                                                                                                                                                                                                                                                                                          |             |
| 45 |                                             |                                                                                                                                                                                                                                                                                          |             |
| 46 |                                             |                                                                                                                                                                                                                                                                                          |             |
| 47 | Dissemination policy: authorship            | #31b Authorship eligibility guidelines and any intended use of professional writers                                                                                                                                                                                                      | See note 12 |
| 48 |                                             |                                                                                                                                                                                                                                                                                          |             |
| 49 |                                             |                                                                                                                                                                                                                                                                                          |             |
| 50 |                                             |                                                                                                                                                                                                                                                                                          |             |
| 51 | Dissemination policy: reproducible research | #31c Plans, if any, for granting public access to the full protocol, participant-level dataset, and statistical code                                                                                                                                                                     | 10          |
| 52 |                                             |                                                                                                                                                                                                                                                                                          |             |
| 53 |                                             |                                                                                                                                                                                                                                                                                          |             |
| 54 |                                             |                                                                                                                                                                                                                                                                                          |             |
| 55 | Informed consent materials                  | #32 Model consent form and other related documentation given to participants and authorised surrogates                                                                                                                                                                                   | See note 13 |
| 56 |                                             |                                                                                                                                                                                                                                                                                          |             |
| 57 |                                             |                                                                                                                                                                                                                                                                                          |             |
| 58 |                                             |                                                                                                                                                                                                                                                                                          |             |
| 59 |                                             |                                                                                                                                                                                                                                                                                          |             |
| 60 |                                             |                                                                                                                                                                                                                                                                                          |             |

1 Biological specimens #33 Plans for collection, laboratory evaluation, and storage of biological n/a  
2 specimens for genetic or molecular analysis in the current trial and  
3 for future use in ancillary studies, if applicable  
4  
5  
6

## 7 Author notes

- 9 1. n/a (not used)
- 11 2. 1 (The corresponding author is Sponsor-Investigator)
- 13 3. 1,11 (see above)
- 15 4. n/a (short, low risk trial)
- 17 5. n/a (no specific criteria)
- 19 6. n/a (no strategies)
- 21 7. n/a (no plans)
- 23 8. n/a (short, low risk study)
- 25 9. 2 (already approved)
- 27 10. n/a (no further modifications are expected)
- 29 11. 10 (public access)
- 31 12. n/a (standard guideline (Vancouver), no professional writers)
- 33 13. n/a (attached in seperate file)

35 The SPIRIT checklist is distributed under the terms of the Creative Commons Attribution License CC-BY-ND  
37 3.0. This checklist was completed on 11. January 2019 using <https://www.goodreports.org/>, a tool made by the  
39 [EQUATOR Network](#) in collaboration with [Penelope.ai](#)  
41  
42  
43  
44  
45  
46  
47  
48  
49  
50  
51  
52  
53  
54  
55  
56  
57  
58  
59

# BMJ Open

## Design of a randomized controlled trial of the effects of empagliflozin on myocardial perfusion, function and metabolism in type 2 diabetes patients at high cardiovascular risk (The SIMPLE trial)

|                                 |                                                                                                                                                                                                                                                                                                                                                                                                                                                                                                                                                                                                                                                                                                                                                                                                                                                                                                                                                                                                                                                                                       |
|---------------------------------|---------------------------------------------------------------------------------------------------------------------------------------------------------------------------------------------------------------------------------------------------------------------------------------------------------------------------------------------------------------------------------------------------------------------------------------------------------------------------------------------------------------------------------------------------------------------------------------------------------------------------------------------------------------------------------------------------------------------------------------------------------------------------------------------------------------------------------------------------------------------------------------------------------------------------------------------------------------------------------------------------------------------------------------------------------------------------------------|
| Journal:                        | <i>BMJ Open</i>                                                                                                                                                                                                                                                                                                                                                                                                                                                                                                                                                                                                                                                                                                                                                                                                                                                                                                                                                                                                                                                                       |
| Manuscript ID                   | bmjopen-2019-029098.R3                                                                                                                                                                                                                                                                                                                                                                                                                                                                                                                                                                                                                                                                                                                                                                                                                                                                                                                                                                                                                                                                |
| Article Type:                   | Protocol                                                                                                                                                                                                                                                                                                                                                                                                                                                                                                                                                                                                                                                                                                                                                                                                                                                                                                                                                                                                                                                                              |
| Date Submitted by the Author:   | 29-Oct-2019                                                                                                                                                                                                                                                                                                                                                                                                                                                                                                                                                                                                                                                                                                                                                                                                                                                                                                                                                                                                                                                                           |
| Complete List of Authors:       | Jürgens, Mikkel; Herlev Hospital, Schou, Morten; Herlev Hospital, Cardiology<br>Hasbak, Philip; Copenhagen University Hospital, Rigshospitalet, Clinical Physiology, Nuclear Medicine & PET 4011, Cluster of Molecular Imaging<br>kjær, andreas; Copenhagen University Hospital, Rigshospitalet, Clinical Physiology, Nuclear Medicine & PET 4011, Cluster of Molecular Imaging<br>Wolsk, Emil; Rigshospitalet, Department of Cardiology - The Heart Centre<br>Zerahn, Bo; Herlev and Gentofte Hospital, University of Copenhagen, Department of Clinical Physiology and Nuclear Medicine<br>Wiberg, Mikkel; Herlev Hospital, Medicine<br>Brandt, Niels; Herlev and Gentofte Hospital, University of Copenhagen, Department of medicine<br>Gæde, Peter; Slagelse Sygehus<br>Rossing, Peter; Steno Diabetes Center AS<br>Faber, J; Herlev Hospital, Medicine<br>Inzucchi, Silvio; Yale School of Medicine, Section of Endocrinology<br>Gustafsson, Finn; Rigshospitalet, Department of Cardiology - The Heart Centre<br>Kistorp, Caroline; Rigshospitalet, Department of Endocrinology |
| <b>Primary Subject Heading</b>: | Diabetes and endocrinology                                                                                                                                                                                                                                                                                                                                                                                                                                                                                                                                                                                                                                                                                                                                                                                                                                                                                                                                                                                                                                                            |
| Secondary Subject Heading:      | Cardiovascular medicine                                                                                                                                                                                                                                                                                                                                                                                                                                                                                                                                                                                                                                                                                                                                                                                                                                                                                                                                                                                                                                                               |
| Keywords:                       | Diabetic nephropathy & vascular disease < DIABETES & ENDOCRINOLOGY, RADIOLOGY, CARDIOLOGY, Cardiovascular imaging < RADIOLOGY & IMAGING                                                                                                                                                                                                                                                                                                                                                                                                                                                                                                                                                                                                                                                                                                                                                                                                                                                                                                                                               |
|                                 |                                                                                                                                                                                                                                                                                                                                                                                                                                                                                                                                                                                                                                                                                                                                                                                                                                                                                                                                                                                                                                                                                       |

SCHOLARONE™  
Manuscripts

1  
2  
3  
4  
5  
6 1 Design of a randomized controlled trial of the effects of empagliflozin on  
7  
8  
9 2 myocardial perfusion, function and metabolism in type 2 diabetes patients  
10  
11  
12 3 at high cardiovascular risk (The SIMPLE trial)  
13  
14  
15 4

---

16  
17 5 Mikkel Jürgens<sup>1</sup>, Morten Schou<sup>2,3</sup>, Philip Hasbak<sup>4</sup>, Andreas Kjær<sup>4</sup>, Emil Wolsk<sup>5</sup>, Bo Zerahn<sup>6</sup>,

18  
19  
20  
21 6 Mikkel Wiberg<sup>1</sup>, Niels Brandt<sup>7</sup>, Peter Gæde<sup>8</sup>, Peter Rossing<sup>3,9</sup>, Jens Faber<sup>1,3</sup>, Silvio E.

22  
23  
24 7 Inzucchi<sup>10</sup>, Finn Gustafsson<sup>4,9</sup>, Caroline Kistorp<sup>3,7</sup>  
25  
26  
27 8

---

28  
29  
30 9 **Author e-mail addresses:**

31  
32 10 Mikkel Jürgens: [mikkel.juergens.01@regionh.dk](mailto:mikkel.juergens.01@regionh.dk); Morten Schou: [morten.schou.04@regionh.dk](mailto:morten.schou.04@regionh.dk); Philip Hasbak:  
33 11 [Philip.Hasbak@regionh.dk](mailto:Philip.Hasbak@regionh.dk); Andreas Kjær: [Andreas.Kjaer@regionh.dk](mailto:Andreas.Kjaer@regionh.dk); Emil Wolsk: [emil.wolsk@regionh.dk](mailto:emil.wolsk@regionh.dk); Bo  
34 12 Zerahn: [Bo.Zerahn@regionh.dk](mailto:Bo.Zerahn@regionh.dk); Mikkel Wiberg: [Mikkel.Wiberg@hotmail.com](mailto:Mikkel.Wiberg@hotmail.com) Niels Brandt:  
35 13 [niels.hoeg.brandt-jacobsen@regionh.dk](mailto:niels.hoeg.brandt-jacobsen@regionh.dk); Peter Gæde: [peter.haulund.gaede@regionh.dk](mailto:peter.haulund.gaede@regionh.dk); Peter Rossing:  
36 14 [peter.rossing@regionh.dk](mailto:peter.rossing@regionh.dk); Jens Faber: [Jens.Faber@regionh.dk](mailto:Jens.Faber@regionh.dk); Silvio E. Inzucchi: [silvio.inzucchi@yale.edu](mailto:silvio.inzucchi@yale.edu); Finn  
37 15 Gustafsson: [Finn.Gustafsson@regionh.dk](mailto:Finn.Gustafsson@regionh.dk); Caroline Kistorp: [caroline.michaela.kistorp@regionh.dk](mailto:caroline.michaela.kistorp@regionh.dk)  
38  
39

40 16 **Word count: 3147**

41  
42 17 **Mesh terms: Diabetes Mellitus, Type 2; Sodium-Glucose Transporter 2 Inhibitors, Cardiovascular Diseases,**  
43 18 **Myocardial Perfusion Imaging, Cardiac Catheterization**

44  
45  
46 19 **Correspondence to: Caroline Kistorp, Medicinsk Endokrinologisk Klinik, Rigshospitalet, Blegdamsvej 9, 2100**  
47 20 **Copenhagen; +45 3545 9642; [caroline.michaela.kistorp@regionh.dk](mailto:caroline.michaela.kistorp@regionh.dk)**  
48  
49

50 21 **ABSTRACT**  
51  
52  
53 22

---

1  
2  
3  
4 1 **Introduction:** A diagnosis of type 2 diabetes (T2D) more than doubles the risk of cardiovascular disease  
5  
6  
7 2 (CVD), with heart failure (HF) being one of the most common complications with a severe prognosis. The  
8  
9  
10 3 landmark EMPA-REG study demonstrated that treatment with the sodium glucose cotransporter-2 (SGLT-  
11  
12 4 2) inhibitor empagliflozin rapidly and significantly reduces CVD mortality and admission rates for HF.  
13  
14  
15 5 However, the mechanisms behind this reduction in clinical events are unknown.

16  
17 6 The current study was designed to investigate the effects of the SGLT-2 inhibitor empagliflozin on  
18  
19  
20 7 myocardial perfusion and function in patients with T2D and high CVD risk.

21  
22 8 **Methods and analysis:** In this investigator-initiated, randomized, double-blind controlled clinical trial, 92  
23  
24  
25 9 patients with T2D and established CVD or high CVD risk, will be randomized to treatment with empagliflozin  
26  
27  
28 10 25 mg or a matching placebo for 13 weeks. The primary outcome measure is change in myocardial flow  
29  
30  
31 11 reserve measured quantitatively by Rubidium-82 position emission tomography (<sup>82</sup>Rb-PET). In a substudy,  
32  
33 12 invasive hemodynamics at rest and during exercise will be measured at baseline and following the  
34  
35  
36 13 intervention, using right heart catheterization.

37  
38 14 **Ethics and dissemination:** The study protocol (v7, 02/08/2018) has been approved by the Ethics Committee  
39  
40  
41 15 of the Capital Region, Danish Data Protection Board and the Danish Medicines Agency, and it will be  
42  
43  
44 16 monitored according to the Good Clinical Practice (GCP) regulations from the International Conference on  
45  
46 17 Harmonization. The results be submitted to international peer-reviewed journals and be presented at  
47  
48  
49 18 conferences. The data will be made available to the public via EudraCT and [www.clinicaltrials.gov](http://www.clinicaltrials.gov).

50  
51 19 **Trial Registration:** ClinicalTrials.gov Identifier: NCT03151343, EudraCT number: 2016-003743-10  
52  
53  
54 20

## ARTICLE SUMMARY

### Strengths and limitations of this study:

- Double-blinded, randomized and placebo controlled.
- The use of advanced imaging techniques.
- Single-center
- No hard endpoints, all outcomes are based on surrogates

## INTRODUCTION

Type 2 diabetes (T2D) is a significant risk factor for cardiovascular disease (CVD), including heart failure (HF), and improved glycaemic control is only modestly beneficial in reducing macrovascular disease.<sup>1</sup>

In 2008, prompted by concerns that the T2D drug rosiglitazone might increase the risk of myocardial infarction, the U.S. Food & Drug Administration published guidelines effectively mandating large cardiovascular outcome trials for new T2D drugs. Several such trials have been completed or are ongoing. The trials have primarily examined the safety of dipeptidyl peptidase 4 (DPP-IV) inhibitors, glucagon-like peptide-1 receptor agonists (GLP-1 RA) and sodium–glucose cotransporter 2 (SGLT2) inhibitors.<sup>2–8</sup> The DPP-IV inhibitor trial SAVOR-TIMI indicated an increase in the secondary endpoint, hospitalization due to HF with the active comparator, while another DPP-IV trial, TECOS, as well as the newly published CARMELINA did not demonstrate an increased risk with the active drug. The GLP-1 RA trials LEADER and SUSTAIN although with a reduction in the primary MACE endpoint were neutral with regards to risk of HF. Most of the SGLT-2 trials have demonstrated CV benefits<sup>9</sup> via a reduction of the primary endpoint MACE. In the EMPA-REG outcome study, the SGLT-2 inhibitor empagliflozin reduced the risk of CV death by 38% and in contrast to the GLP-1 RA trials, admission due to HF by 35% in a high-risk T2D population.<sup>6,10</sup>

The novel evidence from the SGLT-2 inhibitor trials was surprising, because the treatments only had a modest effect on classical CV risk factors. Indeed, the mechanism behind their profound effect on CV death and risk of HF remains unknown, although several hypotheses have been proposed. An effect reducing the atherosclerotic burden is considered unlikely, because the risk of CV events was reduced within weeks of treatment<sup>11</sup>. Thus, the cardioprotective effect might be functional rather than anatomical. Impaired myocardial microcirculation is considered to play a significant role in T2D-related CVD<sup>12</sup> as well as in HF with preserved ejection fraction.<sup>13</sup> Furthermore, coronary vascular dysfunction, particularly decreased vasodilator capacity, is a significant predictor for CV death in patients with T2D.<sup>14,15</sup> Notably, T2D patients with preserved coronary vasodilation had the same



1  
2  
3  
4 1 low risk of CVD as subjects without diabetes<sup>14</sup>. Experimental studies have shown that SGLT-2 inhibitor treatment  
5  
6 2 significantly ameliorates coronary arterial and aortic (media) thickening, pericoronary arterial fibrosis and  
7  
8 3 improves vasodilatation in diabetic rodents.<sup>16,17</sup> Thus, part of the underlying effect of empagliflozin in EMPA-REG  
9  
10 4 could be driven by improvement in myocardial microcirculation.

11 5 A complementary hypothesis has been suggested to explain the early beneficial effects on HF  
12  
13 6 hospitalization found in the EMPA-REG trial.<sup>18</sup> Inhibition of SGLT-2 is associated with increased diuresis, thus the  
14  
15 7 sodium- and volume-reducing effect could favour cardiac loading conditions in patients with T2D with subclinical  
16  
17 8 dysfunctions of the heart. The proposed effects on central hemodynamics, especially right and left heart filling  
18  
19 9 pressures and cardiac output, can be measured directly by right heart catheterization. Pulmonary capillary wedge  
20  
21 10 pressure (PCWP), a measure of left heart filling pressure, has previously been shown to be associated with  
22  
23 11 functional capacity among patients with HF.<sup>19</sup> Therefore, investigating the effect of SGLT-2 inhibitor on central  
24  
25 12 hemodynamics during rest and exercise may contribute vital knowledge on the mechanisms behind the markedly  
26  
27 13 reduced risk of admission for HF demonstrated in EMPA-REG and DECLAIRe TIMI <sup>6,8</sup>.

28 14 The pathogenesis of myocardial dysfunction in T2D has been linked with insulin resistance (IR) and  
29  
30 15 adipose tissue dysfunction, with an increased supply of free fatty acids (FFA) and adipocytokines mediating  
31  
32 16 ectopic fat storage and thus increased intra-myocardial lipid accumulation, with decremental impact on cardiac  
33  
34 17 function.<sup>20</sup> Increased glycosuria with SGLT-2 inhibitors could improve IR by indirectly increasing peripheral  
35  
36 18 glucose uptake<sup>21</sup> through a reduction in glucose toxicity. SGLT-2 inhibitors have been shown to increase the  
37  
38 19 glucagon-insulin ratio, presumably due to the decrease in glucose stimulus.<sup>22</sup> Moreover they induce a small  
39  
40 20 increase in plasma ketone bodies, which some have proposed to be a preferred fuel source for the myocardium.<sup>23</sup>  
41  
42 21 However, others have shown that SGLT-2 inhibitors increase ATP production in mouse model hearts, without  
43  
44 22 increasing ketone oxidation.<sup>24</sup> Markers of inflammation have been associated with the risk of vascular events,  
45  
46 23 independently of traditional risk factors and an effect on markers of inflammation status such as IL-6 and CRP  
47  
48 24 should also be considered.<sup>25</sup> Therefore, further knowledge on the effects of SGLT-2 inhibitors on metabolic  
49  
50 25 parameters, such as biomarkers of inflammation, adipose tissue function and the relationship with parameters  
51  
52 26 on cardiac function in patients with T2D is warranted.

53  
54  
55  
56  
57  
58  
59  
60 27 In summary, SGLT2 inhibitors have been shown to reduce CVD in high-risk T2D patients, with several explanatory  
61  
62 28 hypotheses being suggested that remain to be tested in clinical trials.

## Hypothesis

Treatment with empagliflozin for 13 weeks improves the myocardial flow reserve (MFR) in patients with T2D and high cardiovascular risk. The duration of 13 weeks was chosen, as the EMPA-REG study showed a clear effect on the primary outcomes at this timepoint.

## Objectives

The primary objective of the current trial is to evaluate the effect of empagliflozin on MFR as measured by  $^{82}\text{Rb}$ -PET compared to placebo in patients with T2D and CVD or additional CV risk factors. In a sub study, the effect of empagliflozin on key hemodynamic parameters will be measured during right heart catheterization at rest and during exercise. Key secondary outcomes include changes in cardiac echocardiographic evaluations of systolic and diastolic functions, functional capacity by accelerometry, and changes in glucose metabolism, plasma ketone bodies and adipose tissue function.

## METHODS AND ANALYSIS

### Trial design

This is an investigator-initiated, randomized, placebo-controlled, double-blind trial. Participants will be recruited from the T2D and cardiology outpatient clinics at Herlev-Gentofte University Hospital, Steno Diabetes Center Copenhagen and Rigshospitalet, Denmark. Recruitment started in March 2017 and is expected to continue until early 2020.

### Study population

The study will include 92 patients who have had the T2D diagnosis for at least 3 months, and with no upper limit to the duration of diabetes, who have either additional CV risk factors or pre-existing CVD. Detailed inclusion and exclusion criteria are listed in Table 1. Eligible patients will be invited for screening, and patients who meet all the criteria will be randomized to the double-blinded treatment. Participants will be considered part of the intention to treat (ITT) group after receiving the first dose of the study medication”

### Trial Intervention

Participants will be randomized 1:1 to either empagliflozin 25 mg or matching placebo once daily for 13 weeks. A cross-over design was considered but not implemented, due to the expected high availability of eligible

1  
2  
3  
4 1 participants. A dose of 25 mg rather than 10 mg was chosen, as previous studies have indicated a dose-response  
5  
6 2 effect on metabolic outcomes such as urinary glucose excretion, fasting plasma glucose and mean daily plasma  
7  
8 3 glucose, with higher drug doses resulting in lower glucose levels and increased glucose excretion.<sup>26</sup>. In  
9  
10 4 accordance with the EMPA-REG study, no dose-escalation will be performed. The trial medication will be  
11  
12 5 randomized in computer-generated 1:1 blocks of 10 by the study pharmacy (Glostrup Pharmacy, Copenhagen,  
13  
14 6 Denmark). Participants will receive randomization numbers and the corresponding medication containers  
15  
16 7 sequentially. In case of medical emergency, participants can be unblinded individually. The study medicine will  
17  
18 8 be suspended if the participant becomes pregnant or withdraws consent. The investigators may suspend the  
19  
20 9 medication for safety reasons.  
21  
22  
23

## 24 11 Patient and public involvement

25 12 The study was designed without involvement from patients or the public. The patients will be offered access to  
26  
27 13 the results of the study, when these become available.  
28  
29 14

## 32 15 Trial visits and procedures

### 33 16 Visits

35 17 A schematic overview of the trial visits is presented in Table 2 and as a flowchart in Figure 1. At the screening  
36  
37 18 visit ( $V_0$ ), informed consent will be obtained, and patients will be assessed for eligibility based on medical history,  
38  
39 19 including diabetes duration and comorbidities, physical examinations and blood samples. Ineligible participants  
40  
41 20 will be counted as screen failures, and the reason for screen failure will be recorded.

42 21 Outcome-related procedures are performed at the baseline ( $V_1$ ) and after 13 weeks of treatment ( $V_3$ ). The trial  
43  
44 22 medication will be dispensed when all the procedures pertaining to  $V_1$  have been completed.

45 23 After 3 to 6 weeks of treatment, the participants will visit the trial site for blood tests and a physical examination  
46  
47 24 ( $V_2$ ). Participant status and compliance as well as adverse events will be assessed at  $V_2$ ,  $V_3$  and during two phone  
48  
49 25 calls ( $T_1$  and  $T_2$ ).  
50  
51 26

### 52 27 $^{82}\text{Rb}$ -PET

53  
54  
55  
56  
57  
58  
59  
60

1  
2  
3  
4 1 Myocardial perfusion and myocardial flow reserve (MFR) will be measured using cardiac  $^{82}\text{Rb}$ -PET, which allows  
5  
6 2 for flow quantification in absolute terms. To determine the MFR, measurements will be performed at rest and  
7  
8 3 during adenosine-induced stress. A standard clinical protocol will be used. Participants will be scanned in the  
9  
10 4 supine position using a Siemens Biograph mCT/PET 128-slice scanner (Siemens Medical Solutions, Knoxville,  
11  
12 5 USA). Low-dose non-contrast CT will be acquired for attenuation correction as well as measurement of cardiac  
13  
14 6 adipose tissue volume. Approximately 1100 MBq of  $^{82}\text{Rb}$  will be obtained from a CardioGen-82 Sr-82/Rb-82  
15  
16 7 generator (Bracco Diagnostics, Inc., Princeton, New Jersey, USA) and intravenously infused with a constant  
17  
18 8 flowrate of 50 mL/min. List-mode 3D data acquisition will begin with the tracer infusion and continue for 7  
19  
20 9 minutes. Static and ECG-gated images will be reconstructed with a 2.5-minute delay to allow  $^{82}\text{Rb}$  to clear from  
21  
22 10 the blood pool. Maximal hyperaemia will be induced with adenosine infused at 140  $\mu\text{g}/\text{kg}/\text{min}$  for 6 minutes.  
23  
24 11 After 2.5 minutes of adenosine infusion, intravenous  $^{82}\text{Rb}$  infusion and list-mode acquisition will follow the  
25  
26 12 same protocol as for rest. Myocardial blood perfusion quantification (in mL/min/g) will be performed using  
27  
28 13 Cedars-Sinai QGS+QPS 2015.6 software (Cedars-Sinai Medical Center), which is based on a single-compartment  
29  
30 14 model for Rb-82 tracer kinetics.  
31

### 32 **Hemodynamics sub-study**

33 17 In a substudy, 38 participants randomly selected from the primary study population will perform a graded  
34  
35 18 exercise test until maximal exertion using a supine ergometer with simultaneous invasive hemodynamic  
36  
37 19 measurements. Using local anaesthesia, A Swan-Ganz catheter will be placed into the pulmonary artery via  
38  
39 20 the right internal jugular vein. The following hemodynamic variables will be assessed: pulmonary capillary  
40  
41 21 wedge pressure (PCWP), cardiac output (CO) using thermodilution, central venous pressure (CVP and  
42  
43 22 pulmonary artery pressure (PAP). Following measurements at rest, participants will be transferred to a  
44  
45 23 supine bicycle ergometer, and the measurements will be repeated (leg-raise situation). The participant will  
46  
47 24 be instructed to pedal at 60 rpm and the workload is incrementally increased at steps of 10watts.  
48  
49 25 Measurements during exercise will be obtained at 25 watts and during peak exercise. Blood sampled from  
50  
51 26 the pulmonary vein will be obtained at rest, 25 watts and at peak exercise for analyses of lactate, oxygen  
52  
53 27 saturation and other blood gas variables.  
54

### 55 **Echocardiography**

56  
57  
58  
59  
60

1  
2  
3  
4 1 The following echocardiographic measurements will be obtained using 3D and 2D imaging: left ventricular  
5 2 ejection fraction (LVEF), left ventricle (LV) end-diastolic and end-systolic diameter, LV mass and left atrial  
6 3 volume. From pulsed-wave Doppler mitral inflow curves, E-wave, A-wave, E-decT and isovolumetric  
7 4 relaxation time will be recorded. Tissue Doppler imaging will be obtained in the apical four-chamber, two-  
8 5 chamber and apical long-axis to evaluate peak systolic (s'), early diastolic (e') and late diastolic (a') velocities  
9 6 during the ejection period. Strain measures of LV (radial, circumferential and longitudinal speckle tracking)  
10 7 will be assessed via 2D echocardiography. The longitudinal tissue velocity of the LV will be assessed by  
11 8 averaging myocardial velocities and displacement of the mitral annular position in the septal, lateral,  
12 9 inferior, posterior and anterior wall of the LV. Diastolic function will be assessed according to EAE/ASE  
13 10 recommendations.  
14 11

#### 12 **Cr-51 EDTA**

13 The Cr-51 EDTA method will be used to measure glomerular filtration rate (GFR). A single intravenous  
14 administration of 3.7MBq of Cr-51 EDTA is given. A venous sample is drawn four hours after administration.  
15

#### 16 **Accelerometry**

17 A patient-worn accelerometer will be used to assess daily activity level. The patient will wear the  
18 accelerometer continuously for 7 days, except for bathing and swimming.  
19

#### 20 **Ambulatory blood pressure**

21 24-hour ambulatory blood pressures will be obtained using a Mobil-O-Graph New Generation 24h ABPM  
22 Classic (Siemens, Germany) set to measure blood pressure every 20 minutes during the daytime and every  
23 hour during the night.  
24

#### 25 **Adipose tissue biopsy**

26 Biopsies will be obtained from the abdominal subcutaneous tissue lateral to the umbilicus during a fasting  
27 state using the Bergstrom needle technique. Following dissection, the biopsies are washed and snap frozen  
28 in liquid nitrogen and stored at -80°C. Total mRNA will be extracted from adipose tissue with commercially  
29 available lipid tissue kits to measure the mRNA expression of biomarkers of interest. Protein expression will  
30

1  
2  
3  
4 1 be analysed using Western blots. Quantification of inflammatory cells will be performed according to  
5  
6 2 validated histological procedures. Fibrosis levels will be measured using the Sirius Red stain.  
7  
8 3

#### 9 4 **Oral Glucose Tolerance Test (OGTT)**

10  
11 5 The fasting participant will drink a solution of 75g of glucose. Blood will be drawn at time points 0, 30, 60  
12  
13 6 and 120 minutes, and measurements of plasma glucose, C-peptide and plasma insulin will be taken. Frozen  
14  
15 7 aliquots for measurement of glucagon will be kept for a later sub-study.  
16  
17 8

#### 18 9 **Questionnaires**

19  
20 10 Participants will complete the EQ-5D-5L and the Minnesota Living with Heart Failure questionnaires.  
21  
22 11

#### 23 12 **Heart rate variability (HRV)**

24  
25 13 Heart rate variability will be measured using the Vagus™ handheld device. Heart rate response will be  
26  
27 14 measured at rest, while rising from a lying position to standing upright, during deep in- and expiration and  
28  
29 15 while performing the Valsalva manoeuvre.  
30  
31 16

#### 32 17 **Pulse wave analysis (PWA)**

33  
34 18 Arterial stiffness will be measured using PWA. The procedure will be performed using a SphygmoCor device  
35  
36 19 (version 7.0, Atcor Medical, Sydney, Australia) at the right radial artery.  
37  
38 20

#### 39 21 **Body composition**

40  
41 22 Body composition will be measured by Dual-energy X-ray absorptiometry (DXA) (Hologic Discovery DXA  
42  
43 23 scanner, Hologic Inc., Bedford, USA) based on fat free, fat and bone mass. Supplementary software provides  
44  
45 24 a novel method for differentiating between visceral and subcutaneous abdominal fat.  
46  
47 25

#### 48 26 **Urine and blood samples, fasting**

1  
2  
3  
4 1 Blood will be drawn in the fasting state, and patients will provide a sample of first morning urine. Standard  
5  
6 2 blood analyses will be performed immediately after sampling. Urine samples for measurement of  
7  
8 3 albumin/creatinine ratio and blood samples for specialized biomarkers will be stored at -80°C until batch  
9  
10 4 analysis can be performed. Blood analysis will include inflammatory biomarkers such as interleukin-6 (IL-6)  
11  
12 5 and tumor necrosis factor- $\alpha$  (TNF- $\alpha$ ), cardiospecific biomarkers such as N-terminal pro-B-type natriuretic  
13  
14 6 peptide (NT-proBNP) and high-sensitivity troponin T (hs-TNT), as well as markers of adipocyte function,  
15  
16 7 including adiponectin and leptin.

## 17 8 ENDPOINTS

### 19 9 **Primary outcome measurement**

20  
21 10 The effect of empagliflozin 25 mg once daily for 13 weeks, compared with placebo on the myocardial flow reserve  
22  
23 11 MFR assessed by  $^{82}\text{Rb}$ -PET

### 24 12 **Key sub-study measurement**

25  
26 13 The effect of empagliflozin compared with placebo on PCWP at a workload of 25 watts  
27  
28 14

### 29 15 **Secondary outcome measurements**

30  
31 16 The effect of empagliflozin compared with placebo on the following:

- 32  
33 17 - Global left and right heart function
- 34 18 - Renal function by Cr51-EDTA plasma clearance
- 35 19 - Cardiac adipose tissue volume
- 36 20 - PCWP at peak exercise, corrected to body weight
- 37 21 - Plasma levels of NT-proBNP, MR-proANP, MR-proADM, GAL-3, hsTNT, GDF-15, PIGF, sFlt-1, FFA,  
38 22 adiponectin, leptin, TNF- $\alpha$ , IL-6, MCP-1, MAC-1, COLL-A1, endothelin-1 and FGF-21.
- 39  
40 23 - Daily activity levels
- 41 24 - Body fat distribution and visceral vs. subcutaneous abdominal fat using DXA
- 42 25 - Ambulatory systolic and diastolic blood pressures
- 43 26 - Quality of life assessed by the Minnesota Living with Heart Failure and the EuroQol EQ-5D-5L  
44 27 questionnaires
- 45  
46 28 - Plasma beta-hydroxy butyrate levels
- 47 29 - Urine albumin/creatinine ratio
- 48 30 - Adipose tissue fibrosis, mRNA and protein expression of TNF- $\alpha$ , adiponectin, IL-6, COL1-A1, MAC-1, FGF-  
49 31 21, and monocyte chemoattractant protein 1 (MCP1)

## 1 STATISTICAL ANALYSIS

### 2 SAMPLE SIZE

#### 3 Primary endpoint

The

4 primary endpoint is change in MFR. In a previous study on a comparable population, the SD of measurements  
5 of MFR by  $^{82}\text{Rb}$  PET was 0.8. Assuming a clinically relevant difference between the treatment and placebo  
6 groups after 6 months of 0.5 in MFR,<sup>27</sup> a sample size of 41:41 (empagliflozin: placebo) can be detected with  
7 80% power and a two-sided significance level of 5%. In all, 92 patients will be randomized to allow for a 10%  
8 drop-out rate from the intention-to-treat (ITT) population.

#### 9 Sub-study key endpoint

10 Based on recent experiments in a comparable study population,<sup>28</sup> a difference of 5 mmHg in PCWP during  
11 exercise was considered clinically significant. The SD of measurements of PCWP was 5 mmHg; thus, a sample  
12 size of 16:16 is required with a power of 80% and a two-sided significance level of 5% to detect a difference of  
13 5 mmHg between groups. In total 38 patients will be included in the sub-study to allow for a 15% drop-out  
14 rate.

15 In the ITT population, none of the randomized participants will be excluded, and the patients will be analysed  
16 according to the randomization group. The per-protocol population will consist of all the patients who completed  
17 the study with a documented valid baseline and a final-week assessment of the primary objective without any  
18 major protocol violations. Analysis of the primary outcome parameter will focus on a change in global MBF from  
19 the baseline to week 13 between the treatment and control groups. The primary analysis will be based on the  
20 ITT population. The primary outcome measure will be analysed using ANCOVA with treatment as a factor and  
21 the baseline value as a covariate. The model will include the prespecified covariates age and gender. Missing  
22 data will be estimated using the maximum likelihood method. Normally distributed variables will be presented  
23 as mean  $\pm$ SD, and non-parametric statistics or appropriate log transformation will be performed if an assumption  
24 of normality is not met. After log transformation, the variable will be further tested for normality distribution as  
25 indicated. A two-tailed *p* value of less than 0.05 will be considered statistically significant.



1  
2  
3  
4 1 Comparisons between the treatment groups will be performed by an unpaired two sample *t*-test, Mann-Whitney  
5  
6 2 test or  $\chi^2$  - test as appropriate.  
7

### 9 3 Data management

10 4 Source data will be recorded in the patient record or in case report forms (CRF). The requirements for entering  
11  
12 5 source data directly into the CRF are that the data are obtained directly from the patient either by clinical  
13  
14 6 assessment, interview or point-of-care systems with no printout function and that no more reliable forms of  
15  
16 7 data capture are available. Medical history, height and weight are examples of such data.

17 8 A CRF will be constructed for data capture. Data will be stored in coded form for 5 years according to  
18  
19 9 recommendations from the Danish Data Protection Agency; thereafter, data will be transferred to the Danish  
20  
21 10 Data Archives.  
22

### 26 12 Study medication

27  
28 13 *Name:* Jardiance® (empagliflozin) or a visually identical matching placebo

29  
30 14 *Pharmaceutical Form:* Tablet for oral use

31  
32 15 *Pharmacological Dosage:* Jardiance® or a placebo will be introduced at a dose of 25 mg/day.

33 16 Intake of the tablet can be done at any time during the day; however, it is recommended that the time of  
34  
35 17 intake be consistent from day to day.

36 18 *Side effects:* Very common side effects (> 10%): Hypoglycaemia (when taken in conjunction with insulin or  
37  
38 19 sulfonylureas); Common side effects (1–10%): Skin itching, balanitis, frequent urination, vaginal candidiasis,  
39  
40 20 vulvovaginitis

41 21 *Shipping and packing:* All trial products will be delivered, packed and labelled by Glostrup Pharmacy.

42  
43 22 *Randomization:* Electronic randomization in blocks of 10 will be provided by Glostrup Pharmacy. The  
44  
45 23 randomization list will be stored in a locked cabinet. The patients will be assigned consecutive randomization  
46  
47 24 numbers. Prior to randomization, the patients will be identified by patient numbers which will be assigned  
48  
49 25 consecutively, and patients will retain these numbers following randomization.

### 50 26 Concomitant medication

51 27 Treatment with herbal medicines is not allowed, but otherwise, there are no restrictions on concomitant  
52  
53 28 medication apart from SGLT2-inhibitors. Before enrolment, participants will confirm that they are receiving  
54

1 optimal T2D therapy, and during the trial, T2D and CV risk or disease will be managed according to the best  
2 available evidence.

### 3 ETHICS AND DISSEMINATION

4 The study, which will be conducted in accordance with the latest revision of the Helsinki Declaration, EU directive  
5 on GCP and ICH-GCP guidelines, has been approved by the Regional Scientific Ethics Committee, the Danish  
6 Medicines Agency and the Danish Data Protection Agency. The study is registered at clinicaltrials.gov and  
7 monitored by the GCP unit at Bispebjerg University Hospital. The results of the project will be submitted to  
8 international peer-reviewed journals regardless of their outcome, and the data will be made available to the  
9 public via EudraCT and www.clinicaltrials.gov. Furthermore, the results will be presented at conferences as  
10 abstracts and posters.

#### 11 **Author affiliations:**

12 <sup>1</sup>Centre of Endocrinology and Metabolism, Department of Internal Medicine, Copenhagen University Hospitals  
13 Herlev/Gentofte, Herlev, Denmark.

14 <sup>2</sup>Department of Cardiology, Copenhagen University Hospitals Herlev/Gentofte, Herlev, Denmark.

15 <sup>3</sup>Institute of Clinical Medicine, Faculty of Health and Medical Sciences, University of Copenhagen, Copenhagen,  
16 Denmark

17 <sup>4</sup>Department of Clinical Physiology, Nuclear Medicine & PET and Cluster for Molecular Imaging, Department of  
18 Biomedical Sciences, Rigshospitalet and University of Copenhagen, Copenhagen, Denmark.

19 <sup>5</sup>Department of Cardiology, The Heart Centre, Rigshospitalet Copenhagen University Hospital, Copenhagen,  
20 Denmark

21 <sup>6</sup>Department of Clinical Physiology and Nuclear Medicine, Copenhagen University Hospitals Herlev/Gentofte,  
22 Herlev, Denmark.

23 <sup>7</sup>Department of Endocrinology, Rigshospitalet Copenhagen University Hospital, Copenhagen, Denmark.

24 <sup>8</sup>Slagelse Hospital, Slagelse, Denmark; University of Southern Denmark, Odense, Denmark.

25 <sup>9</sup>Steno Diabetes Center Copenhagen, Gentofte, Denmark.

26 <sup>10</sup>Yale Section of Endocrinology, Yale University School of Medicine, New Haven, CT, USA

#### 29 **Author Contributions:**

30 CK, MS, FG, AK, PH, JF, BZ, SI and MJ conceived the study and participated in its design, planning and  
31 coordination. CK, MS, MW, PG, PR, NB and MJ are responsible for the inclusion and examination of patients at  
32 Herlev-Gentofte and Rigshospitalet University Hospital. AK and PH are responsible for the <sup>82</sup>Rb-PET  
33 measurements and FG, EW for the hemodynamics experiments at Rigshospitalet University Hospital.

#### 34 **Funding:**

1  
2  
3  
4 1 This work is supported by the department of Internal Medicine at Herlev Hospital; the Research council of  
5 2 Herlev Hospital; The Danish Heart Foundation, grant number 16-R107-A6697; The Hartmann Foundation, The  
6 3 Toyota Foundation and by a Steno Collaborative Grant 2018.

8  
9 4 ClinicalTrials.gov Identifier: NCT03151343, EudraCT number: 2016-003743-10

#### 10 5 **Competing interests:**

11 6 PR has received consultancy and/or speaking fees (to his institution) from AbbVie, Astellas, AstraZeneca, Bayer,  
12 7 Boehringer Ingelheim, Bristol-Myers Squibb, Eli Lilly, MSD, Novo Nordisk and Sanofi Aventis and has received  
13 8 institutional research grants from AbbVie, AstraZeneca and Novo Nordisk.

#### 19 10 REFERENCES

- 22 11 1. Turner R. Intensive blood-glucose control with sulphonylureas or insulin compared with conventional  
23 12 treatment and risk of complications in patients with type 2 diabetes (UKPDS 33). *Lancet*.  
24 13 1998;352(9131):837-853. doi:10.1016/S0140-6736(98)07019-6
- 26 14 2. Scirica BM, Bhatt DL, Braunwald E, et al. Saxagliptin and Cardiovascular Outcomes in Patients with Type  
27 15 2 Diabetes Mellitus. *N Engl J Med*. 2013;369(14):1317-1326. doi:10.1056/NEJMoa1307684
- 29 16 3. Green JB, Bethel MA, Armstrong PW, et al. Effect of Sitagliptin on Cardiovascular Outcomes in Type 2  
30 17 Diabetes. *N Engl J Med*. 2015;373(3):232-242. doi:10.1056/NEJMoa1501352
- 32 18 4. Pfeffer MA, Claggett B, Diaz R, et al. Lixisenatide in Patients with Type 2 Diabetes and Acute Coronary  
33 19 Syndrome. *N Engl J Med*. 2015;373(23):2247-2257. doi:10.1056/NEJMoa1509225
- 35 20 5. White WB, Cannon CP, Heller SR, et al. Alogliptin after Acute Coronary Syndrome in Patients with Type 2  
36 21 Diabetes. *N Engl J Med*. 2013;369(14):1327-1335. doi:10.1056/NEJMoa1305889
- 38 22 6. Zinman B, Wanner C, Lachin JM, et al. Empagliflozin, Cardiovascular Outcomes, and Mortality in Type 2  
39 23 Diabetes. *N Engl J Med*. 2015;373(22):2117-2128. doi:10.1056/NEJMoa1504720
- 41 24 7. Guthrie R. Canagliflozin and cardiovascular and renal events in type 2 diabetes. *Postgrad Med*.  
42 25 2018;130(2):149-153. doi:10.1080/00325481.2018.1423852
- 44 26 8. Wiviott SD, Raz I, Bonaca MP, et al. Dapagliflozin and Cardiovascular Outcomes in Type 2 Diabetes. *N*  
45 27 *Engl J Med*. 2018;NEJMoa1812389. doi:10.1056/NEJMoa1812389
- 47 28 9. Cefalu WT, Kaul S, Gerstein HC, et al. Cardiovascular outcomes trials in type 2 diabetes: Where Do We  
48 29 Go From Here? Ref lections From a Diabetes Care Editors' Expert Forum. *Diabetes Care*. 2018;41(1):14-  
49 30 31. doi:10.2337/dci17-0057
- 51 31 10. Fitchett D, the E-REGO trial investigators, Zinman B, et al. Heart failure outcomes with empagliflozin in  
52 32 patients with type 2 diabetes at high cardiovascular risk: results of the EMPA-REG OUTCOME® trial. *Eur*  
53 33 *Heart J*. 2016;37(19):1526-1534. doi:10.1093/eurheartj/ehv728

- 1  
2  
3  
4 1 11. Abdul-Ghani M, Del Prato S, Chilton R, DeFronzo RA. SGLT2 Inhibitors and Cardiovascular Risk: Lessons  
5 2 Learned From the EMPA-REG OUTCOME Study. *Diabetes Care*. 2016;39(5):717-725. doi:10.2337/dc16-  
6 3 0041  
7  
8 4 12. Avogaro A, Albiero M, Menegazzo L, De Kreutzenberg S, Fadini GP. Endothelial dysfunction in diabetes:  
9 5 The role of reparatory mechanisms. *Diabetes Care*. 2011;34(SUPPL. 2):285-290. doi:10.2337/dc11-s239  
10  
11 6 13. Srivaratharajah K, Coutinho T, Dekemp R, et al. Reduced myocardial flow in heart failure patients with  
12 7 preserved ejection fraction. *Circ Hear Fail*. 2016;9(7). doi:10.1161/CIRCHEARTFAILURE.115.002562  
13  
14 8 14. Murthy VL, Naya M, Foster CR, et al. Association between coronary vascular dysfunction and cardiac  
15 9 mortality in patients with and without diabetes mellitus. *Circulation*. 2012;126(15):1858-1868.  
16 10 doi:10.1161/CIRCULATIONAHA.112.120402  
17  
18 11 15. Cortigiani L, Rigo F, Gherardi S, et al. Additional Prognostic Value of Coronary Flow Reserve in Diabetic  
19 12 and Nondiabetic Patients With Negative Dipyridamole Stress Echocardiography by Wall Motion Criteria.  
20 13 *J Am Coll Cardiol*. 2007;50(14):1354-1361. doi:10.1016/j.jacc.2007.06.027  
21  
22 14 16. Lin B, Koibuchi N, Hasegawa Y, et al. Glycemic control with empagliflozin, a novel selective SGLT2  
23 15 inhibitor, ameliorates cardiovascular injury and cognitive dysfunction in obese and type 2 diabetic mice.  
24 16 *Cardiovasc Diabetol*. 2014;13(1). doi:10.1186/s12933-014-0148-1  
25  
26 17 17. Oelze M, Kröller-Schön S, Welschof P, et al. The sodium-glucose co-transporter 2 inhibitor empagliflozin  
27 18 improves diabetes-induced vascular dysfunction in the streptozotocin diabetes rat model by interfering  
28 19 with oxidative stress and glucotoxicity. *PLoS One*. 2014;9(11):e112394.  
29 20 doi:10.1371/journal.pone.0112394  
30  
31 21 18. Sattar N, McLaren J, Kristensen SL, Preiss D, McMurray JJ. SGLT2 Inhibition and cardiovascular events:  
32 22 why did EMPA-REG Outcomes surprise and what were the likely mechanisms? *Diabetologia*. 2016:1-7.  
33 23 doi:10.1007/s00125-016-3956-x  
34  
35 24 19. Emil W, David K, A. BB, et al. Resting and exercise haemodynamics in relation to six-minute walk test in  
36 25 patients with heart failure and preserved ejection fraction. *Eur J Heart Fail*. 2017;20(4):715-722.  
37 26 doi:10.1002/ejhf.976  
38  
39 27 20. Sharma S, Adroque J V, Golfman L, et al. Intramyocardial lipid accumulation in the failing human heart  
40 28 resembles the lipotoxic rat heart. *FASEB J*. 2004;18(14):1692-1700. doi:10.1096/fj.04-2263com  
41  
42 29 21. Ferrannini E, Muscelli E, Frascerra S, et al. Metabolic response to sodium-glucose cotransporter 2  
43 30 inhibition in type 2 diabetic patients. *J Clin Invest*. 2014;124(2):499-508. doi:10.1172/JCI72227.uptake  
44  
45 31 22. Ferrannini E. Sodium-Glucose Co-transporters and Their Inhibition: Clinical Physiology. *Cell Metab*.  
46 32 2017;26(1):27-38. doi:10.1016/j.cmet.2017.04.011  
47  
48 33 23. Ferrannini E, Mark M, Mayoux E. CV Protection in the EMPA-REG OUTCOME Trial: A “Thrifty Substrate”  
49 34 Hypothesis. *Diabetes Care*. 2016;(March):dc160330. doi:10.2337/dc16-0330  
50  
51 35 24. Verma S, Rawat S, Ho KL, et al. Empagliflozin Increases Cardiac Energy Production in Diabetes. *JACC*  
52 36 *Basic to Transl Sci*. 2018. doi:10.1016/j.jacbts.2018.07.006  
53  
54  
55  
56  
57  
58  
59

- 1  
2  
3  
4 1 25. Ridker PM. Clinician's Guide to Reducing Inflammation to Reduce Atherothrombotic Risk. *J Am Coll*  
5 2 *Cardiol.* 2018;72(25):3320-3331. doi:10.1016/j.jacc.2018.06.082  
6  
7 3 26. Heise T, Seewaldt-Becker E, Macha S, et al. Safety, tolerability, pharmacokinetics and  
8 4 pharmacodynamics following 4 weeks' treatment with empagliflozin once daily in patients with type 2  
9 5 diabetes. *Diabetes, Obes Metab.* 2013;15(7):613-621. doi:10.1111/dom.12073  
10  
11 6 27. von Scholten BJ, Hasbak P, Christensen TE, et al. Cardiac 82Rb PET/CT for fast and non-invasive  
12 7 assessment of microvascular function and structure in asymptomatic patients with type 2 diabetes.  
13 8 *Diabetologia.* 2016;59(2):371-378. doi:10.1007/s00125-015-3799-x  
14  
15 9 28. Andersen MJ, Ersbøll M, Axelsson A, et al. Sildenafil and diastolic dysfunction after acute myocardial  
16 10 infarction in patients with preserved ejection fraction: The sildenafil and diastolic dysfunction after  
17 11 acute myocardial infarction (SIDAMI) trial. *Circulation.* 2013;127(11):1200-1208.  
18 12 doi:10.1161/CIRCULATIONAHA.112.000056  
19  
20  
21 13  
22  
23 14  
24  
25  
26  
27  
28  
29  
30  
31  
32  
33  
34  
35  
36  
37  
38  
39  
40  
41  
42  
43  
44  
45  
46  
47  
48  
49  
50  
51  
52  
53  
54  
55  
56  
57  
58  
59  
60

**Inclusion criteria**

- ▶ T2D (WHO criteria), diagnosed at least 3 months before screening, and with no upper limit to duration
- ▶ For patients on background therapy: No change in anti-diabetic therapy within 30 days prior to baseline
- ▶ Hba1c of  $\geq 48$  mmol/L and  $\leq 86$  mmol/L at screening for patients on background therapy or Hba1c of  $\geq 48$  mmol/L and  $\leq 75$  mmol/L at screening for drug-naïve patients
- ▶ Age  $\geq 18$  years
- ▶ BMI  $\leq 45$  kg/m
- ▶ Negative pregnancy test (fertile women). Fertile women must use safe contraceptives (spiral, hormonal contraceptives) for the duration of the study
- ▶ Able to understand the written patient information and to give informed consent
- ▶ High cardiovascular risk, defined as at least one of the following:
  - ACR  $\geq 30$  mg/g
  - NT-proBNP  $\geq 70$  pg/mL
  - Confirmed history of myocardial infarction  $> 2$  months prior to baseline
  - Heart failure according to Framingham Heart Failure Criteria
  - Discharged from hospital with a documented diagnosis of UA  $\leq 12$  months prior to baseline
  - Evidence of coronary artery disease by CAG in one or more major coronary arteries OR at least one of the following: a positive noninvasive stress test, or a positive stress echocardiography showing regional systolic wall motion abnormalities, or a positive scintigraphic test showing stress-induced ischemia
  - History of ischemic or hemorrhagic stroke  $> 2$  months prior to informed consent
  - Presence of peripheral artery disease such as: previous limb angioplasty, stenting or bypass surgery; or previous limb or foot amputation due to circulatory insufficiency; or angiographic evidence of significant ( $> 50\%$ ) peripheral artery stenosis in at least one limb; or evidence from a non-invasive measurement of significant ( $>50\%$  or as reported as hemodynamically significant) peripheral artery stenosis in at least one limb; or ankle brachial index of  $< 0.9$

**Exclusion criteria**

- ▶ Allergic to the study medication
- ▶ Treatment with SGLT-2 inhibitor within 1 month prior to baseline
- ▶ Impaired kidney function, eGFR  $\leq 30$  ml/min
- ▶ Severe liver insufficiency (Child-Pugh class C)
- ▶ ECG showing malign ventricular arrhythmia or prolonged QT-interval ( $>500$ ms)
- ▶ Untreated clinically significant heart valve disease
- ▶ Planned cardiac surgery or angioplasty within 3 months.
- ▶ Myocardial infarction (MI)  $\leq 30$  days prior to baseline
- ▶ Percutaneous coronary intervention (PCI)  $\leq 4$  weeks prior to baseline
- ▶ History of coronary artery bypass graft (CABG)  $\leq 8$  weeks prior to enrollment
- ▶ Prior history of heart transplantation
- ▶ Unstable angina, known severe left main coronary artery stenosis, severe heart failure, uncontrolled

**Table 2 Overview of study visits**

| Visit                                    | V <sub>0</sub> | V <sub>1</sub> | T <sub>1</sub> | V <sub>2</sub> | T <sub>2</sub> | V <sub>3</sub> |
|------------------------------------------|----------------|----------------|----------------|----------------|----------------|----------------|
| Time, weeks                              | -4±1           | 0±1            | 2±1            | 4±1            | 8±1            | 12±1           |
| Inclusion/exclusion criteria             | X              | X              |                |                |                |                |
| Medical history                          | X              |                |                |                |                |                |
| Informed consent                         | X              |                |                |                |                |                |
| Blood samples, non-fasting               | X              |                |                | X              |                |                |
| Physical examination                     | X              |                |                | X              |                |                |
| Adverse events                           |                | X              | X              | X              | X              | X              |
| <b>Endpoints, Main study</b>             |                |                |                |                |                |                |
| <sup>82</sup> Rb -PET (primary endpoint) |                | X              |                |                |                | X              |
| Echocardiography                         |                | X              |                |                |                | X              |
| Ambulatory BP                            |                | X              |                |                |                | X              |
| Adipose tissue biopsy                    |                | X              |                |                |                | X              |
| Oral glucose tolerance test              |                | X              |                |                |                | X              |
| Questionnaires                           |                | X              |                |                |                | X              |
| HRV                                      |                | X              |                |                |                | X              |
| PWA                                      |                | X              |                |                |                | X              |
| <sup>51</sup> Cr EDTA clearance          |                | X              |                |                |                | X              |
| Body composition (DEXA)                  |                | X              |                |                |                | X              |
| Blood samples, fasting                   |                | X              |                |                |                | X              |
| Urine samples, fasting                   |                | X              |                |                |                | X              |
| <b>Endpoints, substudy</b>               |                |                |                |                |                |                |
| Hemodynamics (key secondary endpoint)    |                | X              |                |                |                | X              |
| Accelerometer                            |                | X              |                |                |                | X              |

1

2

1  
2  
3  
4  
5  
6  
7  
8  
9  
10  
11  
12  
13  
14  
15  
16  
17  
18  
19  
20  
21  
22  
23  
24  
25  
26  
27  
28  
29  
30  
31  
32  
33  
34  
35  
36  
37  
38  
39  
40  
41  
42  
43  
44  
45  
46  
47  
48  
49  
50  
51  
52  
53  
54  
55  
56  
57  
58  
59  
60

1

For peer review only

Figure 1  
Time-line of the study visits



Week -4±1

V<sub>0</sub>: Screening, informed consent, N = 92  
BMJ Open

1  
2  
3  
4  
5  
6  
7  
8  
9  
10  
11  
12  
13  
14  
15  
16  
17  
18  
19  
20  
21  
22  
23  
24  
25

V<sub>1</sub>: Baseline measurements

V<sub>1</sub>: Baseline measurements incl. hemodynamics

Randomization, N = 54

Randomization, N = 38

Week 0±1

T<sub>1</sub>: Telephone call

Week 2±1

V<sub>2</sub>: Clinical control

Week 4±1

T<sub>2</sub>: Telephone call

Week 8±1

V<sub>3</sub>: Outcome measurements

V<sub>3</sub>: Outcome measurements incl. hemodynamics

Week 12±1

# Reporting checklist for protocol of a clinical trial.

Based on the SPIRIT guidelines.

## Instructions to authors

Complete this checklist by entering the page numbers from your manuscript where readers will find each of the items listed below.

Your article may not currently address all the items on the checklist. Please modify your text to include the missing information. If you are certain that an item does not apply, please write "n/a" and provide a short explanation.

Upload your completed checklist as an extra file when you submit to a journal.

In your methods section, say that you used the SPIRIT reporting guidelines, and cite them as:

Chan A-W, Tetzlaff JM, Altman DG, Laupacis A, Gøtzsche PC, Krleža-Jerić K, Hróbjartsson A, Mann H, Dickersin K, Berlin J, Doré C, Parulekar W, Summerskill W, Groves T, Schulz K, Sox H, Rockhold FW, Rennie D, Moher D. SPIRIT 2013 Statement: Defining standard protocol items for clinical trials. *Ann Intern Med.* 2013;158(3):200-207

|                                             |     | Reporting Item                                                                                               | Page Number   |
|---------------------------------------------|-----|--------------------------------------------------------------------------------------------------------------|---------------|
| Title                                       | #1  | Descriptive title identifying the study design, population, interventions, and, if applicable, trial acronym | 1             |
| Trial registration                          | #2a | Trial identifier and registry name. If not yet registered, name of intended registry                         | 2             |
| Trial registration: data set                | #2b | All items from the World Health Organization Trial Registration Data Set                                     | See note<br>1 |
| Protocol version                            | #3  | Date and version identifier                                                                                  | 2             |
| Funding                                     | #4  | Sources and types of financial, material, and other support                                                  | 11            |
| Roles and responsibilities: contributorship | #5a | Names, affiliations, and roles of protocol contributors                                                      | 1,11          |
| Roles and responsibilities:                 | #5b | Name and contact information for the trial sponsor                                                           | See note<br>2 |

|    |                      |      |                                                                          |          |
|----|----------------------|------|--------------------------------------------------------------------------|----------|
| 1  | sponsor contact      |      |                                                                          |          |
| 2  | information          |      |                                                                          |          |
| 3  |                      |      |                                                                          |          |
| 4  | Roles and            | #5c  | Role of study sponsor and funders, if any, in study design;              | See note |
| 5  | responsibilities:    |      | collection, management, analysis, and interpretation of data; writing    | 3        |
| 6  | sponsor and funder   |      | of the report; and the decision to submit the report for publication,    |          |
| 7  |                      |      | including whether they will have ultimate authority over any of these    |          |
| 8  |                      |      | activities                                                               |          |
| 9  |                      |      |                                                                          |          |
| 10 |                      |      |                                                                          |          |
| 11 |                      |      |                                                                          |          |
| 12 | Roles and            | #5d  | Composition, roles, and responsibilities of the coordinating centre,     | n/a      |
| 13 | responsibilities:    |      | steering committee, endpoint adjudication committee, data                |          |
| 14 | committees           |      | management team, and other individuals or groups overseeing the          |          |
| 15 |                      |      | trial, if applicable (see Item 21a for data monitoring committee)        |          |
| 16 |                      |      |                                                                          |          |
| 17 |                      |      |                                                                          |          |
| 18 |                      |      |                                                                          |          |
| 19 | Background and       | #6a  | Description of research question and justification for undertaking the   | 2-4      |
| 20 | rationale            |      | trial, including summary of relevant studies (published and              |          |
| 21 |                      |      | unpublished) examining benefits and harms for each intervention          |          |
| 22 |                      |      |                                                                          |          |
| 23 |                      |      |                                                                          |          |
| 24 | Background and       | #6b  | Explanation for choice of comparators                                    | See note |
| 25 | rationale: choice of |      |                                                                          | 4        |
| 26 | comparators          |      |                                                                          |          |
| 27 |                      |      |                                                                          |          |
| 28 |                      |      |                                                                          |          |
| 29 | Objectives           | #7   | Specific objectives or hypotheses                                        | 4        |
| 30 |                      |      |                                                                          |          |
| 31 |                      |      |                                                                          |          |
| 32 | Trial design         | #8   | Description of trial design including type of trial (eg, parallel group, | 4        |
| 33 |                      |      | crossover, factorial, single group), allocation ratio, and framework     |          |
| 34 |                      |      | (eg, superiority, equivalence, non-inferiority, exploratory)             |          |
| 35 |                      |      |                                                                          |          |
| 36 |                      |      |                                                                          |          |
| 37 | Study setting        | #9   | Description of study settings (eg, community clinic, academic            | 4        |
| 38 |                      |      | hospital) and list of countries where data will be collected. Reference  |          |
| 39 |                      |      | to where list of study sites can be obtained                             |          |
| 40 |                      |      |                                                                          |          |
| 41 |                      |      |                                                                          |          |
| 42 | Eligibility criteria | #10  | Inclusion and exclusion criteria for participants. If applicable,        | 14       |
| 43 |                      |      | eligibility criteria for study centres and individuals who will perform  |          |
| 44 |                      |      | the interventions (eg, surgeons, psychotherapists)                       |          |
| 45 |                      |      |                                                                          |          |
| 46 |                      |      |                                                                          |          |
| 47 |                      |      |                                                                          |          |
| 48 | Interventions:       | #11a | Interventions for each group with sufficient detail to allow             | 4-5      |
| 49 | description          |      | replication, including how and when they will be administered            |          |
| 50 |                      |      |                                                                          |          |
| 51 |                      |      |                                                                          |          |
| 52 | Interventions:       | #11b | Criteria for discontinuing or modifying allocated interventions for a    | See note |
| 53 | modifications        |      | given trial participant (eg, drug dose change in response to harms,      | 5        |
| 54 |                      |      | participant request, or improving / worsening disease)                   |          |
| 55 |                      |      |                                                                          |          |
| 56 |                      |      |                                                                          |          |
| 57 | Interventions:       | #11c | Strategies to improve adherence to intervention protocols, and any       | See note |
| 58 | adherence            |      | procedures for monitoring adherence (eg, drug tablet return;             | 6        |
| 59 |                      |      |                                                                          |          |
| 60 |                      |      |                                                                          |          |

|    |                      |                   |                                                                        |
|----|----------------------|-------------------|------------------------------------------------------------------------|
|    |                      | laboratory tests) |                                                                        |
| 1  |                      |                   |                                                                        |
| 2  |                      |                   |                                                                        |
| 3  | Interventions:       | #11d              | Relevant concomitant care and interventions that are permitted or      |
| 4  | concomitant care     |                   | prohibited during the trial                                            |
| 5  |                      |                   |                                                                        |
| 6  | Outcomes             | #12               | Primary, secondary, and other outcomes, including the specific         |
| 7  |                      |                   | measurement variable (eg, systolic blood pressure), analysis metric    |
| 8  |                      |                   | (eg, change from baseline, final value, time to event), method of      |
| 9  |                      |                   | aggregation (eg, median, proportion), and time point for each          |
| 10 |                      |                   | outcome. Explanation of the clinical relevance of chosen efficacy      |
| 11 |                      |                   | and harm outcomes is strongly recommended                              |
| 12 |                      |                   |                                                                        |
| 13 |                      |                   |                                                                        |
| 14 |                      |                   |                                                                        |
| 15 |                      |                   |                                                                        |
| 16 | Participant timeline | #13               | Time schedule of enrolment, interventions (including any run-ins       |
| 17 |                      |                   | and washouts), assessments, and visits for participants. A schematic   |
| 18 |                      |                   | diagram is highly recommended (see Figure)                             |
| 19 |                      |                   |                                                                        |
| 20 |                      |                   |                                                                        |
| 21 | Sample size          | #14               | Estimated number of participants needed to achieve study objectives    |
| 22 |                      |                   | and how it was determined, including clinical and statistical          |
| 23 |                      |                   | assumptions supporting any sample size calculations                    |
| 24 |                      |                   |                                                                        |
| 25 |                      |                   |                                                                        |
| 26 | Recruitment          | #15               | Strategies for achieving adequate participant enrolment to reach       |
| 27 |                      |                   | target sample size                                                     |
| 28 |                      |                   |                                                                        |
| 29 |                      |                   |                                                                        |
| 30 | Allocation: sequence | #16a              | Method of generating the allocation sequence (eg, computer-            |
| 31 | generation           |                   | generated random numbers), and list of any factors for stratification. |
| 32 |                      |                   | To reduce predictability of a random sequence, details of any          |
| 33 |                      |                   | planned restriction (eg, blocking) should be provided in a separate    |
| 34 |                      |                   | document that is unavailable to those who enrol participants or        |
| 35 |                      |                   | assign interventions                                                   |
| 36 |                      |                   |                                                                        |
| 37 |                      |                   |                                                                        |
| 38 |                      |                   |                                                                        |
| 39 |                      |                   |                                                                        |
| 40 | Allocation           | #16b              | Mechanism of implementing the allocation sequence (eg, central         |
| 41 | concealment          |                   | telephone; sequentially numbered, opaque, sealed envelopes),           |
| 42 | mechanism            |                   | describing any steps to conceal the sequence until interventions are   |
| 43 |                      |                   | assigned                                                               |
| 44 |                      |                   |                                                                        |
| 45 |                      |                   |                                                                        |
| 46 |                      |                   |                                                                        |
| 47 | Allocation:          | #16c              | Who will generate the allocation sequence, who will enrol              |
| 48 | implementation       |                   | participants, and who will assign participants to interventions        |
| 49 |                      |                   |                                                                        |
| 50 |                      |                   |                                                                        |
| 51 | Blinding (masking)   | #17a              | Who will be blinded after assignment to interventions (eg, trial       |
| 52 |                      |                   | participants, care providers, outcome assessors, data analysts), and   |
| 53 |                      |                   | how                                                                    |
| 54 |                      |                   |                                                                        |
| 55 |                      |                   |                                                                        |
| 56 | Blinding (masking):  | #17b              | If blinded, circumstances under which unblinding is permissible, and   |
| 57 | emergency            |                   | procedure for revealing a participant's allocated intervention during  |
| 58 |                      |                   |                                                                        |
| 59 |                      |                   |                                                                        |
| 60 |                      |                   |                                                                        |

|    |                        |      |                                                                         |          |
|----|------------------------|------|-------------------------------------------------------------------------|----------|
| 1  | unblinding             |      | the trial                                                               |          |
| 2  |                        |      |                                                                         |          |
| 3  | Data collection plan   | #18a | Plans for assessment and collection of outcome, baseline, and other     | 9        |
| 4  |                        |      | trial data, including any related processes to promote data quality     |          |
| 5  |                        |      | (eg, duplicate measurements, training of assessors) and a description   |          |
| 6  |                        |      | of study instruments (eg, questionnaires, laboratory tests) along with  |          |
| 7  |                        |      | their reliability and validity, if known. Reference to where data       |          |
| 8  |                        |      | collection forms can be found, if not in the protocol                   |          |
| 9  |                        |      |                                                                         |          |
| 10 |                        |      |                                                                         |          |
| 11 |                        |      |                                                                         |          |
| 12 | Data collection plan:  | #18b | Plans to promote participant retention and complete follow-up,          | See note |
| 13 | retention              |      | including list of any outcome data to be collected for participants     | 7        |
| 14 |                        |      | who discontinue or deviate from intervention protocols                  |          |
| 15 |                        |      |                                                                         |          |
| 16 |                        |      |                                                                         |          |
| 17 | Data management        | #19  | Plans for data entry, coding, security, and storage, including any      | 9        |
| 18 |                        |      | related processes to promote data quality (eg, double data entry;       |          |
| 19 |                        |      | range checks for data values). Reference to where details of data       |          |
| 20 |                        |      | management procedures can be found, if not in the protocol              |          |
| 21 |                        |      |                                                                         |          |
| 22 |                        |      |                                                                         |          |
| 23 |                        |      |                                                                         |          |
| 24 | Statistics: outcomes   | #20a | Statistical methods for analysing primary and secondary outcomes.       | 9        |
| 25 |                        |      | Reference to where other details of the statistical analysis plan can   |          |
| 26 |                        |      | be found, if not in the protocol                                        |          |
| 27 |                        |      |                                                                         |          |
| 28 |                        |      |                                                                         |          |
| 29 |                        |      |                                                                         |          |
| 30 | Statistics: additional | #20b | Methods for any additional analyses (eg, subgroup and adjusted          | 9        |
| 31 | analyses               |      | analyses)                                                               |          |
| 32 |                        |      |                                                                         |          |
| 33 |                        |      |                                                                         |          |
| 34 | Statistics: analysis   | #20c | Definition of analysis population relating to protocol non-adherence    | 9        |
| 35 | population and         |      | (eg, as randomised analysis), and any statistical methods to handle     |          |
| 36 | missing data           |      | missing data (eg, multiple imputation)                                  |          |
| 37 |                        |      |                                                                         |          |
| 38 |                        |      |                                                                         |          |
| 39 | Data monitoring:       | #21a | Composition of data monitoring committee (DMC); summary of its          | See note |
| 40 | formal committee       |      | role and reporting structure; statement of whether it is independent    | 8        |
| 41 |                        |      | from the sponsor and competing interests; and reference to where        |          |
| 42 |                        |      | further details about its charter can be found, if not in the protocol. |          |
| 43 |                        |      | Alternatively, an explanation of why a DMC is not needed                |          |
| 44 |                        |      |                                                                         |          |
| 45 |                        |      |                                                                         |          |
| 46 |                        |      |                                                                         |          |
| 47 | Data monitoring:       | #21b | Description of any interim analyses and stopping guidelines,            | n/a      |
| 48 | interim analysis       |      | including who will have access to these interim results and make the    |          |
| 49 |                        |      | final decision to terminate the trial                                   |          |
| 50 |                        |      |                                                                         |          |
| 51 |                        |      |                                                                         |          |
| 52 | Harms                  | #22  | Plans for collecting, assessing, reporting, and managing solicited and  | 5        |
| 53 |                        |      | spontaneously reported adverse events and other unintended effects      |          |
| 54 |                        |      | of trial interventions or trial conduct                                 |          |
| 55 |                        |      |                                                                         |          |
| 56 |                        |      |                                                                         |          |
| 57 |                        |      |                                                                         |          |
| 58 | Auditing               | #23  | Frequency and procedures for auditing trial conduct, if any, and        | 10       |
| 59 |                        |      |                                                                         |          |
| 60 |                        |      |                                                                         |          |

|    |                       |      |                                                                          |          |
|----|-----------------------|------|--------------------------------------------------------------------------|----------|
| 1  |                       |      | whether the process will be independent from investigators and the       |          |
| 2  |                       |      | sponsor                                                                  |          |
| 3  |                       |      |                                                                          |          |
| 4  | Research ethics       | #24  | Plans for seeking research ethics committee / institutional review       | See note |
| 5  | approval              |      | board (REC / IRB) approval                                               | 9        |
| 6  |                       |      |                                                                          |          |
| 7  |                       |      |                                                                          |          |
| 8  | Protocol amendments   | #25  | Plans for communicating important protocol modifications (eg,            | See note |
| 9  |                       |      | changes to eligibility criteria, outcomes, analyses) to relevant parties | 10       |
| 10 |                       |      | (eg, investigators, REC / IRBs, trial participants, trial registries,    |          |
| 11 |                       |      | journals, regulators)                                                    |          |
| 12 |                       |      |                                                                          |          |
| 13 |                       |      |                                                                          |          |
| 14 | Consent or assent     | #26a | Who will obtain informed consent or assent from potential trial          | 4,5,11   |
| 15 |                       |      | participants or authorised surrogates, and how (see Item 32)             |          |
| 16 |                       |      |                                                                          |          |
| 17 |                       |      |                                                                          |          |
| 18 | Consent or assent:    | #26b | Additional consent provisions for collection and use of participant      | n/a      |
| 19 | ancillary studies     |      | data and biological specimens in ancillary studies, if applicable        |          |
| 20 |                       |      |                                                                          |          |
| 21 |                       |      |                                                                          |          |
| 22 | Confidentiality       | #27  | How personal information about potential and enrolled participants       | 9        |
| 23 |                       |      | will be collected, shared, and maintained in order to protect            |          |
| 24 |                       |      | confidentiality before, during, and after the trial                      |          |
| 25 |                       |      |                                                                          |          |
| 26 |                       |      |                                                                          |          |
| 27 | Declaration of        | #28  | Financial and other competing interests for principal investigators      | 11       |
| 28 | interests             |      | for the overall trial and each study site                                |          |
| 29 |                       |      |                                                                          |          |
| 30 |                       |      |                                                                          |          |
| 31 | Data access           | #29  | Statement of who will have access to the final trial dataset, and        | See note |
| 32 |                       |      | disclosure of contractual agreements that limit such access for          | 11       |
| 33 |                       |      | investigators                                                            |          |
| 34 |                       |      |                                                                          |          |
| 35 |                       |      |                                                                          |          |
| 36 | Ancillary and post    | #30  | Provisions, if any, for ancillary and post-trial care, and for           | n/a      |
| 37 | trial care            |      | compensation to those who suffer harm from trial participation           | (none)   |
| 38 |                       |      |                                                                          |          |
| 39 |                       |      |                                                                          |          |
| 40 | Dissemination policy: | #31a | Plans for investigators and sponsor to communicate trial results to      | 10       |
| 41 | trial results         |      | participants, healthcare professionals, the public, and other relevant   |          |
| 42 |                       |      | groups (eg, via publication, reporting in results databases, or other    |          |
| 43 |                       |      | data sharing arrangements), including any publication restrictions       |          |
| 44 |                       |      |                                                                          |          |
| 45 |                       |      |                                                                          |          |
| 46 |                       |      |                                                                          |          |
| 47 | Dissemination policy: | #31b | Authorship eligibility guidelines and any intended use of                | See note |
| 48 | authorship            |      | professional writers                                                     | 12       |
| 49 |                       |      |                                                                          |          |
| 50 |                       |      |                                                                          |          |
| 51 | Dissemination policy: | #31c | Plans, if any, for granting public access to the full protocol,          | 10       |
| 52 | reproducible research |      | participant-level dataset, and statistical code                          |          |
| 53 |                       |      |                                                                          |          |
| 54 |                       |      |                                                                          |          |
| 55 | Informed consent      | #32  | Model consent form and other related documentation given to              | See note |
| 56 | materials             |      | participants and authorised surrogates                                   | 13       |
| 57 |                       |      |                                                                          |          |
| 58 |                       |      |                                                                          |          |
| 59 |                       |      |                                                                          |          |
| 60 |                       |      |                                                                          |          |

1 Biological specimens #33 Plans for collection, laboratory evaluation, and storage of biological n/a  
2 specimens for genetic or molecular analysis in the current trial and  
3 for future use in ancillary studies, if applicable  
4  
5  
6

## 7 Author notes

- 9 1. n/a (not used)
- 11 2. 1 (The corresponding author is Sponsor-Investigator)
- 13 3. 1,11 (see above)
- 15 4. n/a (short, low risk trial)
- 17 5. n/a (no specific criteria)
- 19 6. n/a (no strategies)
- 21 7. n/a (no plans)
- 23 8. n/a (short, low risk study)
- 25 9. 2 (already approved)
- 27 10. n/a (no further modifications are expected)
- 29 11. 10 (public access)
- 31 12. n/a (standard guideline (Vancouver), no professional writers)
- 33 13. n/a (attached in seperate file)

35 The SPIRIT checklist is distributed under the terms of the Creative Commons Attribution License CC-BY-ND  
37 3.0. This checklist was completed on 11. January 2019 using <https://www.goodreports.org/>, a tool made by the  
39 [EQUATOR Network](#) in collaboration with [Penelope.ai](#)  
41  
42  
43  
44  
45  
46  
47  
48  
49  
50  
51  
52  
53  
54  
55  
56  
57  
58  
59
